# Supplementary material for: Denticity governs the formation of β-thioketiminato tri-copper(i) and mono-copper(i) complexes
Source: Royal Society of Chemistry journal article supplement (doi:10.1039/d3dt00474k), 2023-01-01
Supplement: d3dt00474k1.pdf [file d3dt00474k1.pdf]

Supporting information for

## Denticity Governs on the Formation of $\beta$ -Thioketiminato Tri-Copper(I) and Mono-Copper(I) Complexes

Venkata Sai Sashankh Penki<sup>a</sup>, Yu-Lun Chang<sup>a</sup>, Hsing-Yin Chen<sup>a</sup>, Yu-Ting Chu<sup>a,b</sup>, Yu-Ting Kuo<sup>a,b</sup>, Dorothy Priyanka Dorairaj<sup>a,c</sup>, Sri Sudewi<sup>a,d</sup>, Shang-Wu Ding<sup>b</sup>, and Sodio C.N. Hsu<sup>a,b,e\*</sup>

<sup>a</sup> Department of Medicinal and Applied Chemistry, Kaohsiung Medical University, Kaohsiung 80708, Taiwan.

<sup>b</sup> Department of Chemistry, National Sun Yat-Sen University, Kaohsiung 80424, Taiwan.

<sup>c</sup> Department of Chemistry, National Institute of Technology, Tiruchirappalli 620015, India

<sup>d</sup> Department of pharmacy, Faculty of Mathematic and Natural science, Universitas Sam Ratulangi, Manado 95115, Indonesia.

<sup>e</sup> Department of Medical Research, Kaohsiung Medical University Hospital, Kaohsiung 80708, Taiwan.

Table of contents

|                                                                                                                                                                                   |     |
|-----------------------------------------------------------------------------------------------------------------------------------------------------------------------------------|-----|
| <b>Ligand Synthesis</b> .....                                                                                                                                                     | S6  |
| <b>Figure S1.</b> <sup>1</sup> H NMR spectrum of HL <sub>1</sub> in C <sub>6</sub> D <sub>6</sub> (400 MHz, 298 K).....                                                           | S8  |
| <b>Figure S2.</b> <sup>13</sup> C NMR spectrum of HL <sub>1</sub> in C <sub>6</sub> D <sub>6</sub> (100 MHz, 298 K). Solvent residual peaks are marked with an asterisk (*) ..... | S9  |
| <b>Figure S3.</b> <sup>1</sup> H NMR spectrum of HL <sub>2</sub> in C <sub>6</sub> D <sub>6</sub> (400 MHz, 298 K). Solvent residual peaks are marked with an asterisk (*) .....  | S10 |
| <b>Figure S4.</b> <sup>13</sup> C NMR spectrum of HL <sub>2</sub> in C <sub>6</sub> D <sub>6</sub> (100 MHz, 298 K). Solvent residual peaks are marked with an asterisk (*) ..... | S11 |
| <b>Figure S5.</b> <sup>1</sup> H NMR spectrum of HL <sub>3</sub> in C <sub>6</sub> D <sub>6</sub> (400 MHz, 298 K). Solvent residual peaks are marked with an asterisk (*) .....  | S12 |
| <b>Figure S6.</b> <sup>13</sup> C NMR spectrum of HL <sub>1</sub> in C <sub>6</sub> D <sub>6</sub> (100 MHz, 298 K). Solvent residual peaks are marked with an asterisk (*).....  | S13 |
| <b>Figure S7.</b> <sup>1</sup> H NMR spectrum of HL <sub>4</sub> in C <sub>6</sub> D <sub>6</sub> (400 MHz, 298 K). Solvent residual peaks are marked with an asterisk (*).....   | S14 |
| <b>Figure S8.</b> <sup>13</sup> C NMR spectrum of HL <sub>4</sub> in C <sub>6</sub> D <sub>6</sub> (100 MHz, 298 K). Solvent residual peaks are marked with an asterisk (*).....  | S15 |

|                                                                                                                                                                                                                       |     |
|-----------------------------------------------------------------------------------------------------------------------------------------------------------------------------------------------------------------------|-----|
| <b>Figure S9.</b> $^1\text{H}$ NMR spectrum of $[\text{L}_1\text{Cu}]_3$ in $\text{CDCl}_3$ (400 MHz, 298 K). Solvent residual peaks are marked with an asterisk (*).                                                 | S16 |
| <b>Figure S10.</b> $^{13}\text{C}$ NMR spectrum of $[\text{L}_1\text{Cu}]_3$ in $\text{CDCl}_3$ (100 MHz, 298 K). Solvent residual peaks are marked with an asterisk (*).                                             | S17 |
| <b>Figure S11.</b> $^1\text{H}$ NMR spectrum of $[\text{L}_2\text{Cu}]_3$ in $\text{CDCl}_3$ (400 MHz, 298 K). Solvent residual peaks are marked with an asterisk (*).                                                | S18 |
| <b>Figure S12.</b> $^{13}\text{C}$ NMR spectrum of $[\text{L}_2\text{Cu}]_3$ in $\text{CDCl}_3$ (100 MHz, 298 K). Solvent residual peaks are marked with an asterisk (*).                                             | S19 |
| <b>Figure S13.</b> $^1\text{H}$ NMR spectrum of $\text{L}_3\text{Cu}$ in $\text{DMSO-D}_6$ (400 MHz, 298 K). Solvent residual peaks are marked with an asterisk (*).                                                  | S20 |
| <b>Figure S14.</b> $^{13}\text{C}$ NMR spectrum of $\text{L}_3\text{Cu}$ in $\text{DMSO-D}_6$ (100 MHz, 298 K). Solvent residual peaks are marked with an asterisk (*).                                               | S21 |
| <b>Figure S15.</b> $^1\text{H}$ NMR spectrum of $\text{L}_4\text{Cu}$ in $\text{C}_6\text{D}_6$ (400 MHz, 298 K). Solvent residual peaks are marked with an asterisk (*).                                             | S22 |
| <b>Figure S16.</b> $^{13}\text{C}$ NMR spectrum of $\text{L}_4\text{Cu}$ in $\text{C}_6\text{D}_6$ (100 MHz, 298 K). Solvent residual peaks are marked with an asterisk (*).                                          | S23 |
| <b>Figure S17.</b> $^1\text{H}$ NMR spectrum of $\text{L}_1\text{Cu}(2,4,6\text{-CNC}_6\text{H}_2\text{Me}_3)$ in $\text{C}_6\text{D}_6$ (400 MHz, 298 K). Solvent residual peaks are marked with an asterisk (*).    | S24 |
| <b>Figure S18.</b> $^{13}\text{C}$ NMR spectrum of $\text{L}_1\text{Cu}(2,4,6\text{-CNC}_6\text{H}_2\text{Me}_3)$ in $\text{C}_6\text{D}_6$ (100 MHz, 298 K). Solvent residual peaks are marked with an asterisk (*). | S25 |
| <b>Figure S19.</b> $^1\text{H}$ NMR spectrum of $\text{L}_2\text{Cu}(2,4,6\text{-CNC}_6\text{H}_2\text{Me}_3)$ in $\text{C}_6\text{D}_6$ (400 MHz, 298 K). Solvent residual peaks are marked with an asterisk (*).    | S26 |
| <b>Figure S20.</b> $^{13}\text{C}$ NMR spectrum of $\text{L}_2\text{Cu}(2,4,6\text{-CNC}_6\text{H}_2\text{Me}_3)$ in $\text{C}_6\text{D}_6$ (100 MHz, 298 K). Solvent residual peaks are marked with an asterisk (*). | S27 |
| <b>Figure S21.</b> $^1\text{H}$ NMR spectrum of $\text{L}_3\text{Cu}(2,4,6\text{-CNC}_6\text{H}_2\text{Me}_3)$ in $\text{C}_6\text{D}_6$ (400 MHz, 298 K). Solvent residual peaks are marked with an asterisk (*).    | S28 |
| <b>Figure S22.</b> $^{13}\text{C}$ NMR spectrum of $\text{L}_3\text{Cu}(2,4,6\text{-CNC}_6\text{H}_2\text{Me}_3)$ in $\text{C}_6\text{D}_6$ (100 MHz, 298 K). Solvent residual peaks are marked with an asterisk (*). | S29 |
| <b>Figure S23.</b> $^1\text{H}$ NMR spectrum of $\text{L}_4\text{Cu}(2,4,6\text{-CNC}_6\text{H}_2\text{Me}_3)$ in $\text{C}_6\text{D}_6$ (400 MHz, 298 K). Solvent residual peaks are marked with an asterisk (*).    | S30 |
| <b>Figure S24.</b> $^{13}\text{C}$ NMR spectrum of $\text{L}_4\text{Cu}(2,4,6\text{-CNC}_6\text{H}_2\text{Me}_3)$ in $\text{C}_6\text{D}_6$ (100 MHz, 298 K). Solvent residual peaks are marked with an asterisk (*). | S31 |
| <b>Figure S25.</b> $^1\text{H}$ NMR spectrum of $\text{L}_1\text{Cu}(\text{PPh}_3)$ in $\text{C}_6\text{D}_6$ (400 MHz, 298 K). Solvent residual peaks are marked with an asterisk (*).                               | S32 |

|                                                                                                                                                                                            |     |
|--------------------------------------------------------------------------------------------------------------------------------------------------------------------------------------------|-----|
| <b>Figure S26.</b> $^{13}\text{C}$ NMR spectrum of $\text{L}_1\text{Cu}(\text{PPh}_3)$ in $\text{C}_6\text{D}_6$ (100 MHz, 298 K). Solvent residual peaks are marked with an asterisk (*). | S33 |
| <b>Figure S27.</b> $^{31}\text{P}$ NMR spectrum of $\text{L}_1\text{Cu}(\text{PPh}_3)$ in $\text{C}_6\text{D}_6$ (162 MHz, 298 K). Solvent residual peaks are marked with an asterisk (*). | S34 |
| <b>Figure S28.</b> $^1\text{H}$ NMR spectrum of $\text{L}_2\text{Cu}(\text{PPh}_3)$ in $\text{C}_6\text{D}_6$ (400 MHz, 298 K). Solvent residual peaks are marked with an asterisk (*).    | S35 |
| <b>Figure S29.</b> $^{13}\text{C}$ NMR spectrum of $\text{L}_2\text{Cu}(\text{PPh}_3)$ in $\text{C}_6\text{D}_6$ (100 MHz, 298 K). Solvent residual peaks are marked with an asterisk (*). | S36 |
| <b>Figure S30.</b> $^{31}\text{P}$ NMR spectrum of $\text{L}_2\text{Cu}(\text{PPh}_3)$ in $\text{C}_6\text{D}_6$ (162 MHz, 298 K). Solvent residual peaks are marked with an asterisk (*). | S37 |
| <b>Figure S31.</b> $^1\text{H}$ NMR spectrum of $\text{L}_3\text{Cu}(\text{PPh}_3)$ in $\text{C}_6\text{D}_6$ (400 MHz, 298 K). Solvent residual peaks are marked with an asterisk (*).    | S38 |
| <b>Figure S32.</b> $^{13}\text{C}$ NMR spectrum of $\text{L}_3\text{Cu}(\text{PPh}_3)$ in $\text{C}_6\text{D}_6$ (100 MHz, 298 K). Solvent residual peaks are marked with an asterisk (*). | S39 |
| <b>Figure S33.</b> $^{31}\text{P}$ NMR spectrum of $\text{L}_3\text{Cu}(\text{PPh}_3)$ in $\text{C}_6\text{D}_6$ (162 MHz, 298 K). Solvent residual peaks are marked with an asterisk (*). | S40 |
| <b>Figure S34.</b> $^1\text{H}$ NMR spectrum of $\text{L}_4\text{Cu}(\text{PPh}_3)$ in $\text{C}_6\text{D}_6$ (400 MHz, 298 K). Solvent residual peaks are marked with an asterisk (*).    | S41 |
| <b>Figure S35.</b> $^{13}\text{C}$ NMR spectrum of $\text{L}_4\text{Cu}(\text{PPh}_3)$ in $\text{C}_6\text{D}_6$ (100 MHz, 298 K). Solvent residual peaks are marked with an asterisk (*). | S42 |
| <b>Figure S36.</b> $^{31}\text{P}$ NMR spectrum of $\text{L}_4\text{Cu}(\text{PPh}_3)$ in $\text{C}_6\text{D}_6$ (162 MHz, 298 K). Solvent residual peaks are marked with an asterisk (*). | S43 |
| <b>Figure S37.</b> $^1\text{H}$ NMR spectrum of $\text{L}_1\text{Cu-CO}$ in $\text{CDCl}_3$ (400 MHz, 298 K). Solvent residual peaks are marked with an asterisk (*).                      | S44 |
| <b>Figure S38.</b> $^{13}\text{C}$ NMR spectrum of $\text{L}_1\text{Cu-CO}$ in $\text{CDCl}_3$ (100 MHz, 298 K). Solvent residual peaks are marked with an asterisk (*).                   | S45 |
| <b>Figure S39.</b> $^1\text{H}$ NMR spectrum of $\text{L}_2\text{Cu-CO}$ in $\text{CDCl}_3$ (400 MHz, 298 K). Solvent residual peaks are marked with an asterisk (*).                      | S46 |
| <b>Figure S40.</b> $^{13}\text{C}$ NMR spectrum of $\text{L}_2\text{Cu-CO}$ in $\text{CDCl}_3$ (400 MHz, 298 K). Solvent residual peaks are marked with an asterisk (*).                   | S47 |
| <b>Figure S41.</b> $^1\text{H}$ NMR spectrum of $\text{L}_3\text{Cu-CO}$ in Acetone- $\text{D}_6$ (400 MHz, 298 K). Solvent residual peaks are marked with an asterisk (*).                | S48 |
| <b>Figure S42.</b> $^{13}\text{C}$ NMR spectrum of $\text{L}_3\text{Cu-CO}$ in Acetone- $\text{D}_6$ (100 MHz, 298 K). Solvent residual peaks are marked with an asterisk (*).             | S49 |

|                                                                                                                                                                                                                                                                                                                                                                                                                                                                                                                         |     |
|-------------------------------------------------------------------------------------------------------------------------------------------------------------------------------------------------------------------------------------------------------------------------------------------------------------------------------------------------------------------------------------------------------------------------------------------------------------------------------------------------------------------------|-----|
| <b>Figure S43.</b> $^1\text{H}$ NMR spectrum of $\text{L}_4\text{Cu-CO}$ in Acetone- $\text{D}_6$ (400 MHz, 298 K). Solvent residual peaks are marked with an asterisk (*).....                                                                                                                                                                                                                                                                                                                                         | S50 |
| <b>Figure S44.</b> $^{13}\text{C}$ NMR spectrum of $\text{L}_4\text{Cu-CO}$ in Acetone- $\text{D}_6$ (100 MHz, 298 K). Solvent residual peaks are marked with an asterisk (*).....                                                                                                                                                                                                                                                                                                                                      | S51 |
| <b>Figure S45.</b> Cyclic voltammetry diagrams of A. $[\text{L}_1\text{Cu}]_3$ , B. $[\text{L}_2\text{Cu}]_3$ , C. $\text{L}_3\text{Cu}$ , and D. $\text{L}_4\text{Cu}$ in $10^{-4}$ M MeCN solutions using 0.1 M $(\text{Bu}_4\text{N})(\text{PF}_6)$ as supporting electrolyte, referenced to $\text{Fc}^{+/0}$ . ....                                                                                                                                                                                                | S52 |
| <b>Figure S46.</b> Cyclic voltammetry diagrams correspond to two SN chelator copper complexes with $10^{-4}$ M solutions of $[\text{L}_1\text{Cu}]_3$ in (a) $\text{CH}_3\text{CN}$ , (b) $\text{CH}_2\text{Cl}_2$ , (c) $\text{CH}_3\text{NO}_2$ respectively and $[\text{L}_2\text{Cu}]_3$ in (d) $\text{CH}_3\text{CN}$ , (e) $\text{CH}_2\text{Cl}_2$ , (f) $\text{CH}_3\text{NO}_2$ respectively using 0.1 M $(\text{Bu}_4\text{N})(\text{PF}_6)$ as supporting electrolyte, referenced to $\text{Fc}^{+/0}$ ..... | S53 |
| <b>Figure S47.</b> (1) ORTEP X-ray structure of $\text{L}_1\text{Cu}(\text{PPh}_3)$ (2) ORTEP X-ray structures of two independent molecules of $\text{L}_2\text{CuPPh}_3$ (a) and (b) similar to each other present in same unit cell (3) ORTEP X-ray structures of three independent molecules of $\text{L}_2\text{Cu}(2,4,6\text{-CNC}_6\text{H}_2\text{Me}_3)$ a, b, and c similar to each other present in same unit cell at the 50% probability level. Hydrogen atoms are not shown for clarity.....               | S54 |
| <b>Figure S48.</b> Solution state FTIR of copper(I) carbonyl adducts(THF). A. $\text{L}_1\text{CuCO}$ , B. $\text{L}_2\text{CuCO}$ , C. $\text{L}_3\text{CuCO}$ , D. $\text{L}_4\text{CuCO}$ .....                                                                                                                                                                                                                                                                                                                      | S55 |
| <b>Figure S49.</b> Solid state FTIR (KBr) of copper(I) isocyanide adducts. A. $\text{L}_1\text{CuCNR}$ , B. $\text{L}_2\text{CuCNR}$ , C. $\text{L}_3\text{CuCNR}$ , D. $\text{L}_4\text{CuCNR}$ .....                                                                                                                                                                                                                                                                                                                  | S55 |
| <b>Figure S50.</b> Solution state FTIR of copper(I) isocyanide adducts(THF). A. $\text{L}_1\text{CuCNR}$ , B. $\text{L}_2\text{CuCNR}$ , C. $\text{L}_3\text{CuCNR}$ , D. $\text{L}_4\text{CuCNR}$ .....                                                                                                                                                                                                                                                                                                                | S56 |
| <b>Figure S51.</b> ORTEP X-ray structure of $\text{HL}_3$ at the 50% probability level. Hydrogen atoms are not shown for clarity except $\text{H}_1$ and $\text{H}_{3a}$ group.....                                                                                                                                                                                                                                                                                                                                     | S56 |
| <b>Figure S52.</b> Stiochiometric titration $^1\text{H}$ NMR for (a) $\text{HL}_1 + \text{CuO}^t\text{Bu}$ expanded regions 7.45 to 5.8 ppm, (b) $\text{HL}_2 + \text{CuO}^t\text{Bu}$ expanded region 7.65 to 5.65 ppm and (c) $\text{HL}_4 + \text{CuO}^t\text{Bu}$ expanded region 1.00 to 4.00 and 5.00 to 9.00 ppm.....                                                                                                                                                                                            | S58 |
| <b>Figure S53.</b> (A) Elucidation of Variable Temperature $^1\text{H}$ NMR for $\text{L}_4\text{CuCO}$ in Toluene- $\text{d}_8$ at $-93^\circ\text{C}$ and $25^\circ\text{C}$ . Expanded region 0.5 to 4.2 ppm and 5.2 to 8.6 ppm (B) Variable Temperature $^1\text{H}$ NMR for $\text{L}_4\text{CuCO}$ expanded region 5.2-8.6 ppm.....                                                                                                                                                                               | S59 |
| <b>Figure S54.</b> UV absorbance change for 0.1 mM (A) $[\text{L}_1\text{Cu}]_3$ and (B) $\text{L}_3\text{Cu}$ complexes before and after treatment with $\text{Ag}^+$ in acetonitrile at room temperature.....                                                                                                                                                                                                                                                                                                         | S60 |
| <b>Table S1.</b> Selected bond distances ( $\text{\AA}$ ) and bond angles (deg) for $\text{L}_1\text{Cu}(2,4,6\text{-CNC}_6\text{H}_2\text{Me}_3)$ , $\text{L}_2\text{Cu}(2,4,6\text{-CNC}_6\text{H}_2\text{Me}_3)$ , and $\text{L}_4\text{Cu}(2,4,6\text{-CNC}_6\text{H}_2\text{Me}_3)$ .....                                                                                                                                                                                                                          | S61 |

|                                                                                                                                                                                                                                                             |     |
|-------------------------------------------------------------------------------------------------------------------------------------------------------------------------------------------------------------------------------------------------------------|-----|
| <b>Table S2.</b> Selected Bond distances (Å) and Bond Angles (deg) for <b>L<sub>1</sub>Cu(PPh<sub>3</sub>)</b> , <b>L<sub>2</sub>Cu(PPh<sub>3</sub>)</b> , and <b>L<sub>4</sub>Cu(PPh<sub>3</sub>)</b> .....                                                | S62 |
| <b>Table S3.</b> Selected bond lengths (Å) and bond angles (°) for copper(I) adducts, <b>L<sub>2</sub>Cu(2,4,6-CNC<sub>6</sub>H<sub>2</sub>Me<sub>3</sub>)</b> and <b>L<sub>2</sub>CuPPh<sub>3</sub></b> .....                                              | S63 |
| <b>Table S4.</b> Crystallographic data for synthesized ligands <b>HL<sub>1</sub></b> , <b>HL<sub>2</sub></b> , <b>HL<sub>3</sub></b> , <b>HL<sub>4</sub></b> and copper(I) complexes [ <b>L<sub>1</sub>Cu</b> ] <sub>3</sub> , <b>L<sub>3</sub>Cu</b> ..... | S64 |
| <b>Table S5.</b> Crystallographic data for synthesized copper(I) phosphine and isocyanide adducts..                                                                                                                                                         | S65 |
| <b>Table S6.</b> Selected bond lengths (Å) and bond angles (°) for <b>HL<sub>3</sub></b> .....                                                                                                                                                              | S66 |
| <b>Table S7.</b> CV data for [ <b>L<sub>1</sub>Cu</b> ] <sub>3</sub> , [ <b>L<sub>2</sub>Cu</b> ] <sub>3</sub> , <b>L<sub>3</sub>Cu</b> , and <b>L<sub>4</sub>Cu</b> complexes in MeCN solutions.....                                                       | S66 |
| <b>Table S8.</b> Kinetic data and equilibrium constants of carbonylation and decarbonylation for β-thioketiminato copper(I) complexes.....                                                                                                                  | S66 |

## Ligand Synthesis:

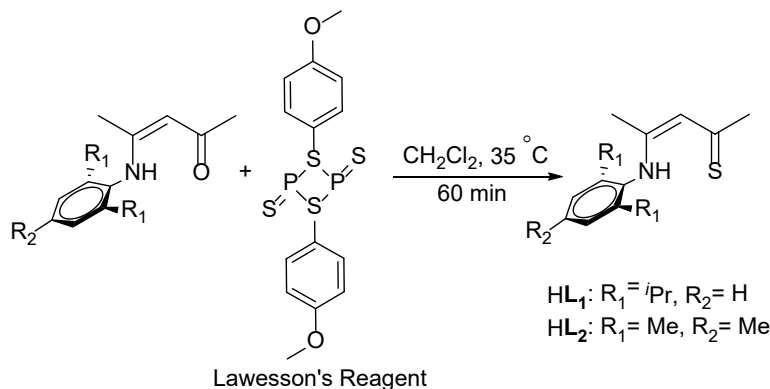

**HL<sub>1</sub>.** The reaction of (*Z*)-4-((2,6-diisopropylphenyl)amino)pent-3-en-2-one (5.00 g, 19.27 mmol), and Lawesson's reagent (3.89 g, 9.637 mmol) were dissolved in dichloromethane (50ml) and heated at 35 °C for 1h. The volatiles were removed under vacuum to give a reddish orange oil that was purified by column chromatography ethyl acetate/hexane 1:10 ratio. Solvent is removed by vacuum to give reddish-orange oil. Recrystallization of the crude product from hexane gave pure HL<sub>1</sub> as reddish-orange crystals (4.45 g, 85 % yield). (<sup>1</sup>H NMR (C<sub>6</sub>D<sub>6</sub>, 400 MHz, 298K, δ): 15.85 (bs, 1H, NH), 7.12 (m, 1H, Ar-H), 7.00 (d, 2H, Ar-H), 6.10 (s, 1H, backbone-CH), 2.95 (septet, *J* = 6.8 Hz, 2H, CH(CH<sub>3</sub>)<sub>2</sub>), 2.67 (s, 3H, backbone-CH<sub>3</sub>), 1.38(s, 3H, backbone-CH<sub>3</sub>), 1.03 (dd, *J* = 4.0 Hz, 12H, CH(CH<sub>3</sub>)<sub>2</sub>). <sup>13</sup>C {<sup>1</sup>H} NMR (C<sub>6</sub>D<sub>6</sub>, 100 MHz, 298K, δ): 209.10, 165.28, 145.62, 133.13, 128.98, 124.00, 112.45, 39.15, 29.02, 25.09, 22.48, 20.39. Anal. Calcd for C<sub>17</sub>H<sub>25</sub>NS: C, 74.13; H, 9.15; N, 5.09. Found: C, 74.15; H, 9.11; N, 5.08.

**HL<sub>2</sub>.** The reaction of (*Z*)-4-(mesitylamino)pent-3-en-2-one (5 g, 23.0 mmol) and Lawesson's reagent (4.64 g, 11.50 mmol) in dichloromethane gave purified by column chromatography ethyl acetate/hexane 1:10 ratio. Solvent is removed by vacuum to give reddish-orange oil. Recrystallization of the crude product from hexane gave pure HL<sub>2</sub> as reddish-orange crystals (4.66 g, 87 % yield). <sup>1</sup>H NMR (C<sub>6</sub>D<sub>6</sub>, 400 MHz, 298K, δ): 15.57 (bs, 1H, NH), 6.02 (s, 2H, Ar-H), 6.09 (s, 1H, backbone-CH), 2.67 (s, 3H, backbone-CH<sub>3</sub>), 2.06 (s, 3H, *para* ArCH<sub>3</sub>), 1.93 (s, 6H, *ortho* ArCH<sub>3</sub>), 1.34 (s, 3H, backbone-CH<sub>3</sub>). <sup>13</sup>C {<sup>1</sup>H} NMR (C<sub>6</sub>D<sub>6</sub>, 100 MHz, 298K, δ): 208.70, 165.72, 137.44, 134.71, 133.51, 129.38, 112.64, 39.16, 20.95, 20.03, 18.13. Anal. % Calcd for C<sub>14</sub>H<sub>19</sub>NS: C, 72.05; H, 8.21; N, 6.00. Found: C, 72.10; H, 8.11; N, 5.96.

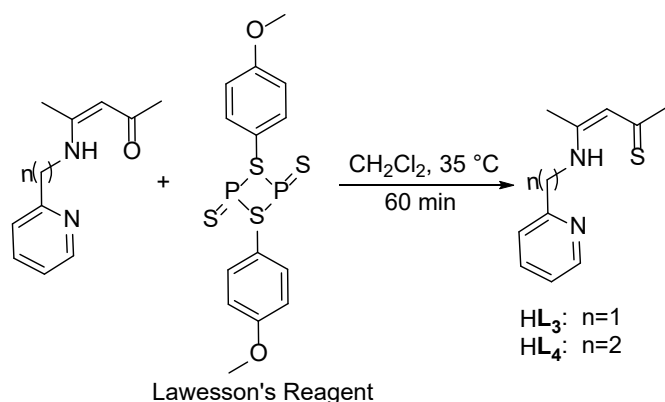

**HL<sub>3</sub>**: The reaction of (Z)-4-((pyridin-2-ylmethyl)amino)pent-3-en-2-one (5.00 g, 26.28 mmol), and Lawesson's reagent (5.30 g, 13.14 mmol) were dissolved in dichloromethane (50ml) and heated at 35 °C for 1h. The volatiles were removed under vacuum to give a reddish-brown oil was purified by column chromatography ethyl acetate/ dichloromethane 1:10 ratio. Solvent is removed by vacuum to give reddish orange oil. Recrystallization of the crude product from dichloromethane gave pure **HL<sub>3</sub>** as reddish-brown crystals (3.48 g, 73.4 % yield). <sup>1</sup>H NMR (C<sub>6</sub>D<sub>6</sub>, 400 MHz, 298K, δ): 14.65 (bs, 1H, NH), 8.32 (d, 1H, *J*=4 Hz, Py1), 7.03 (ddd, 1H, *J*=7.6 Hz, Py2), 6.95 (d, *J*=8 Hz, 1H, Py4), 6.62 (m, 1H, Py3), 5.92 (s, 1H, backbone CH), 4.16 (s, 2H, CH<sub>2</sub>Py), 2.61 (s, 3H, backbone-CH<sub>3</sub>), 1.46 (s, 3H, backbone-CH<sub>3</sub>). <sup>13</sup>C{<sup>1</sup>H} NMR (C<sub>6</sub>D<sub>6</sub>, 100 MHz, 298K, δ): 207.06, 165.66, 156.79, 149.70, 136.81, 122.50, 121.22, 113.24, 48.97, 39.16, 20.22. Anal. % Calcd for C<sub>11</sub>H<sub>14</sub>N<sub>2</sub>S: C, 64.04; H, 6.84; N, 13.58. Found: C, 64.05; H, 6.82; N, 13.55.

**HL<sub>4</sub>**. The reaction of (Z)-4-((2-(pyridin-2-yl)ethyl)amino)pent-3-en-2-one (5 g, 24.50 mmol) and Lawesson's reagent (4.95 g, 11.50 mmol) in dichloromethane gave purified by column chromatography ethyl acetate/ dichloromethane 1:10 ratio. Solvent is removed by vacuum to give reddish-orange oil. Recrystallization of the crude product from hexane gave pure **HL<sub>4</sub>** as reddish-brown crystals (4.20 g, 77.80 % yield). <sup>1</sup>H NMR (C<sub>6</sub>D<sub>6</sub>, 400 MHz, 298K, δ): 14.32 (bs, 1H, NH), 8.39 (d, 1H, *J*=4 Hz, Py1), 7.05 (ddd, 1H, *J*=7.6 Hz, Py2), 6.79 (d, *J*=8 Hz, 1H, Py4), 6.63 (dd, 1H, Py3), 5.80 (s, 1H, backbone CH), 3.32 (q, 2H, CH<sub>2</sub>CH<sub>2</sub>Py), 2.72 (t, 2H, CH<sub>2</sub>CH<sub>2</sub>Py), 2.58 (s, 3H, backbone-CH<sub>3</sub>), 1.33 (s, 3H, backbone-CH<sub>3</sub>). <sup>13</sup>C{<sup>1</sup>H} NMR (C<sub>6</sub>D<sub>6</sub>, 100 MHz, 298K, δ): 205.01, 165.20, 158.12, 149.72, 136.28, 123.95, 121.82, 112.72, 43.08, 38.95, 37.85, 19.84. Anal. % Calcd for C<sub>12</sub>H<sub>16</sub>N<sub>2</sub>S: C, 65.42; H, 7.32; N, 12.71. Found: C, 65.39; H, 7.32; N, 12.74.

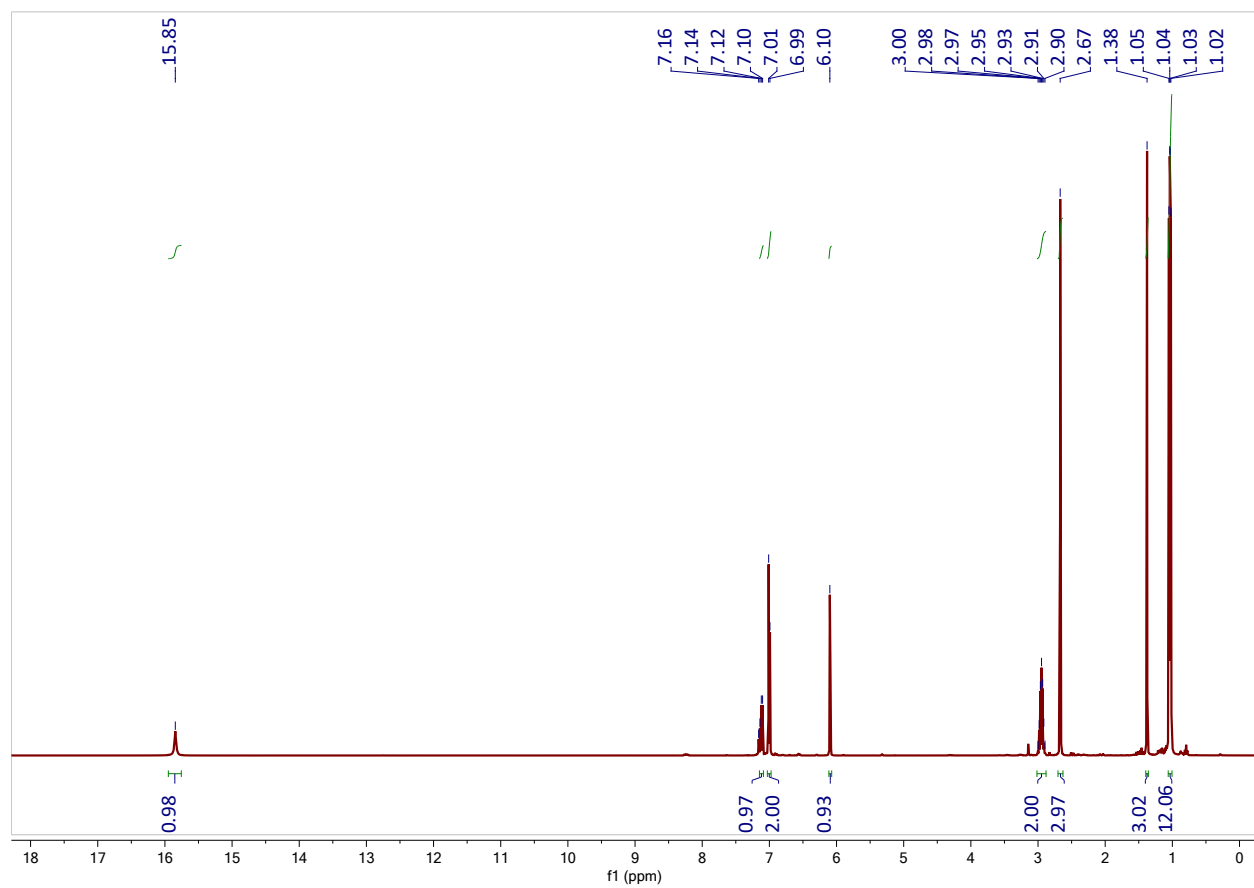

**Figure S1.**  $^1\text{H}$  NMR spectrum of HL1 in  $\text{C}_6\text{D}_6$  (400 MHz, 298 K).



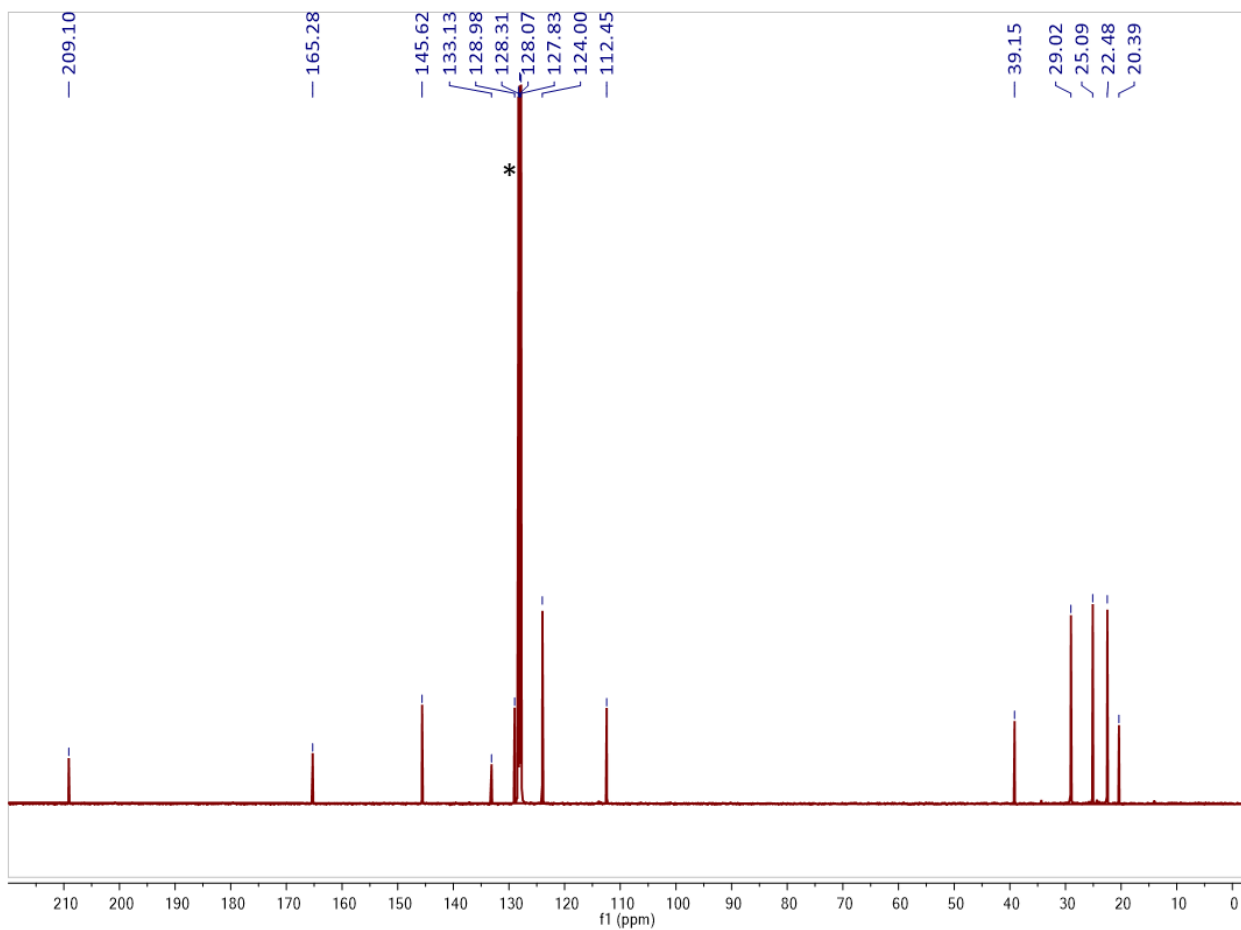

**Figure S2.**  $^{13}\text{C}$  NMR spectrum of  $\text{HL}_1$  in  $\text{C}_6\text{D}_6$  (100 MHz, 298 K). Solvent residual peaks are marked with an asterisk (\*).

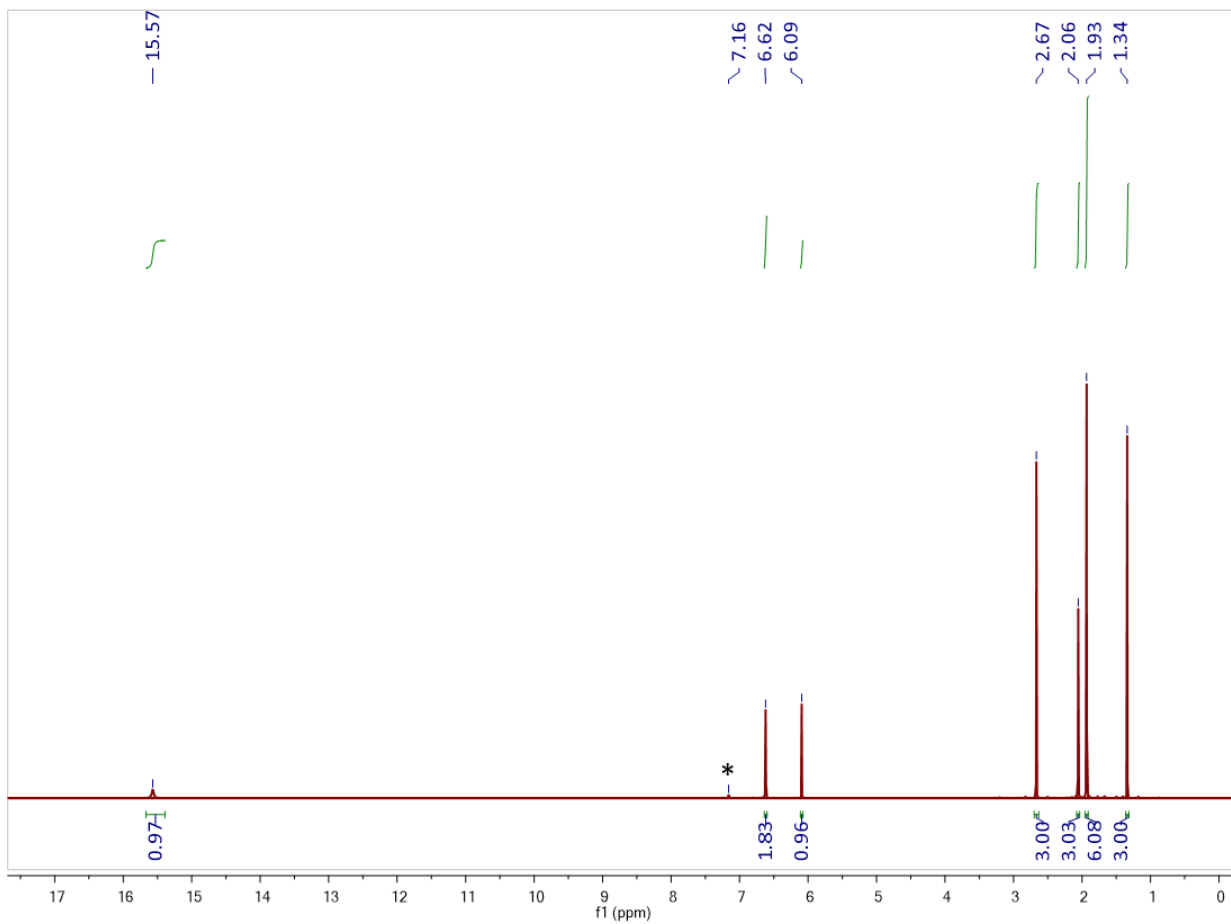

**Figure S3.**  $^1\text{H}$  NMR spectrum of  $\text{HL}_2$  in  $\text{C}_6\text{D}_6$  (400 MHz, 298 K). Solvent residual peaks are marked with an asterisk (\*).

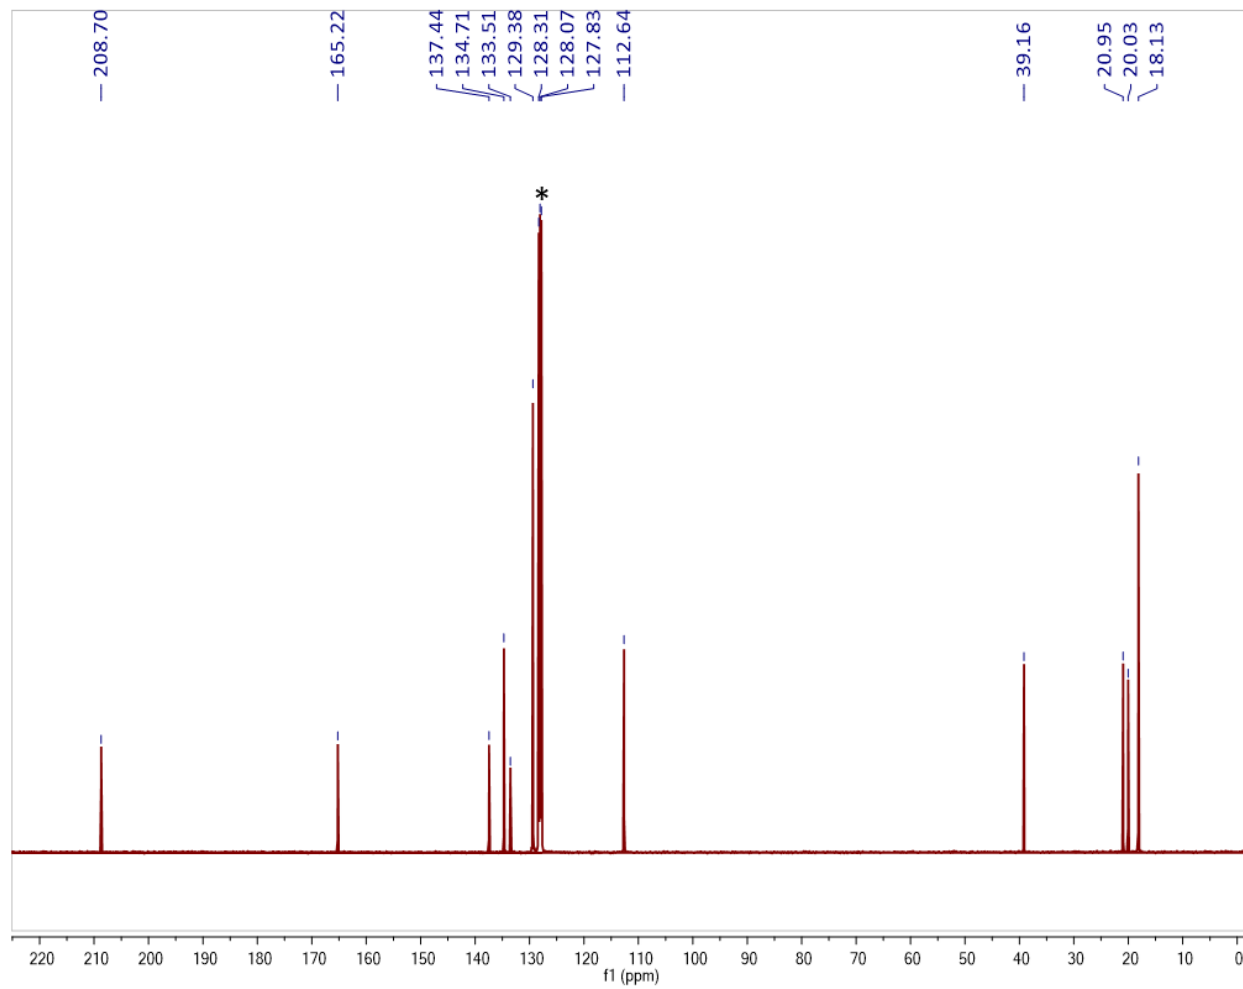

**Figure S4.**  $^{13}\text{C}$  NMR spectrum of HL2 in  $\text{C}_6\text{D}_6$  (100 MHz, 298 K). Solvent residual peaks are marked with an asterisk (\*).

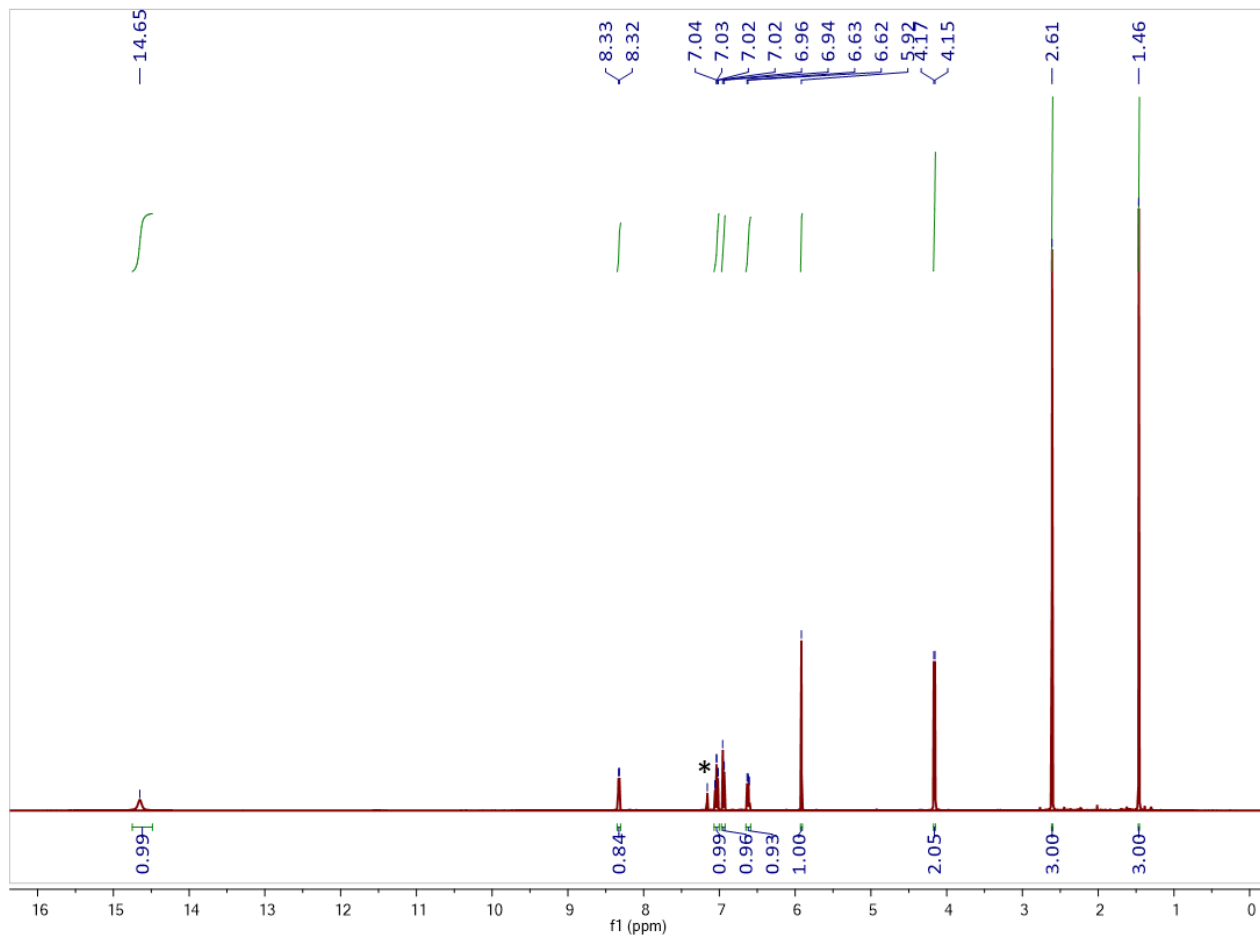

**Figure S5.**  $^1\text{H}$  NMR spectrum of  $\text{HL}_3$  in  $\text{C}_6\text{D}_6$  (400 MHz, 298 K). Solvent residual peaks are marked with an asterisk (\*).

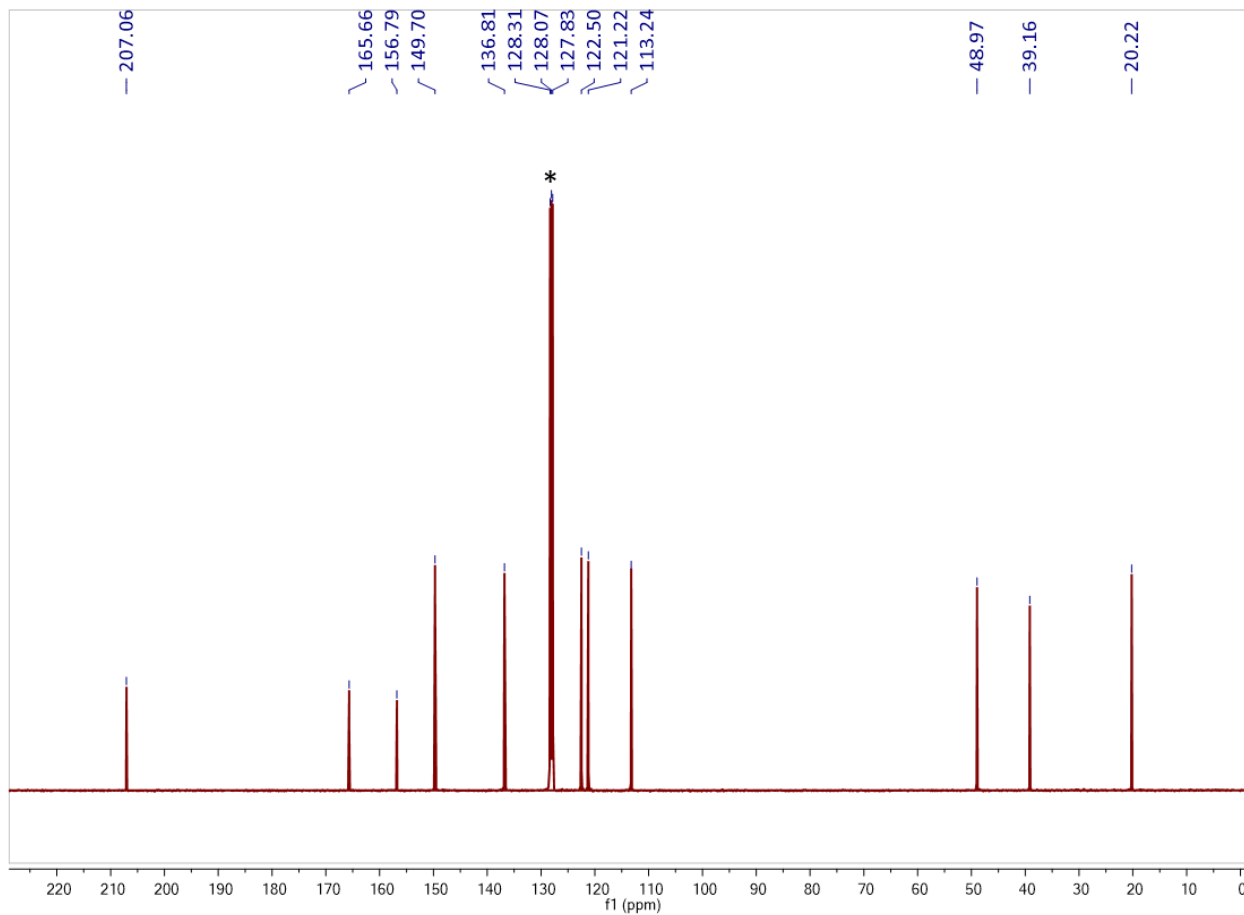

**Figure S6.**  $^{13}\text{C}$  NMR spectrum of HL3 in  $\text{C}_6\text{D}_6$  (100 MHz, 298 K). Solvent residual peaks are marked with an asterisk (\*).

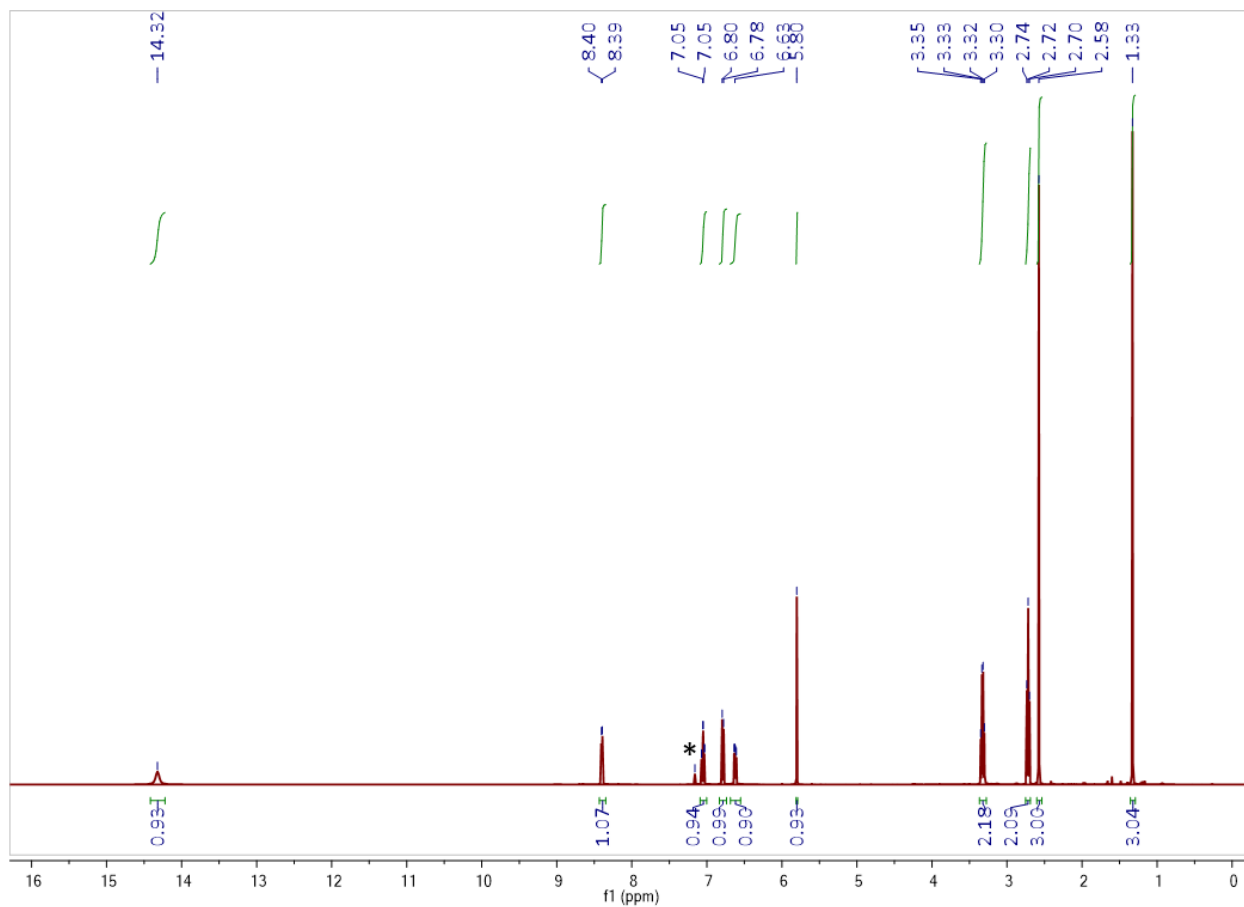

**Figure S7.**  $^1\text{H}$  NMR spectrum of HL4 in  $\text{C}_6\text{D}_6$  (400 MHz, 298 K). Solvent residual peaks are marked with an asterisk (\*).

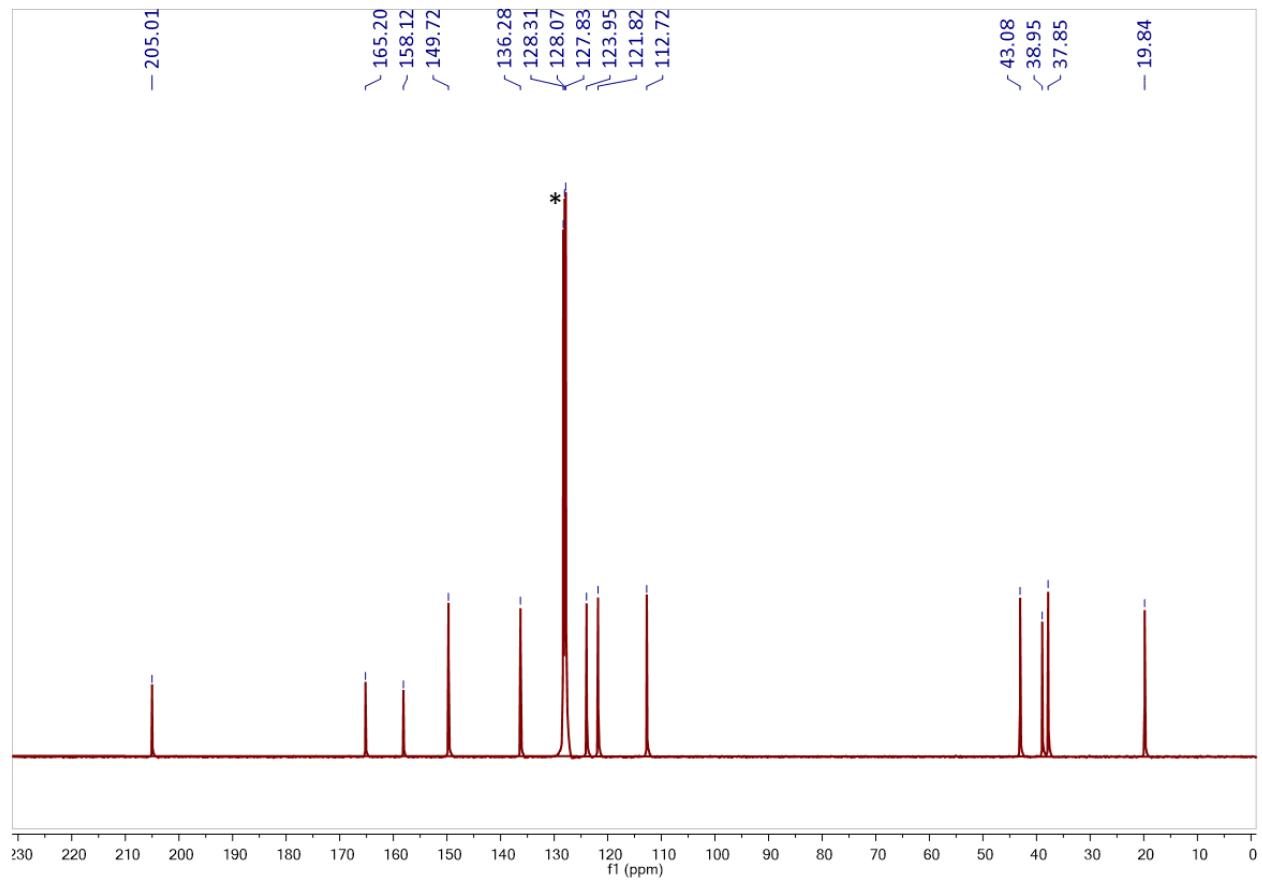

**Figure S8.** <sup>13</sup>C NMR spectrum of HL4 in C<sub>6</sub>D<sub>6</sub> (100 MHz, 298 K). Solvent residual peaks are marked with an asterisk (\*).

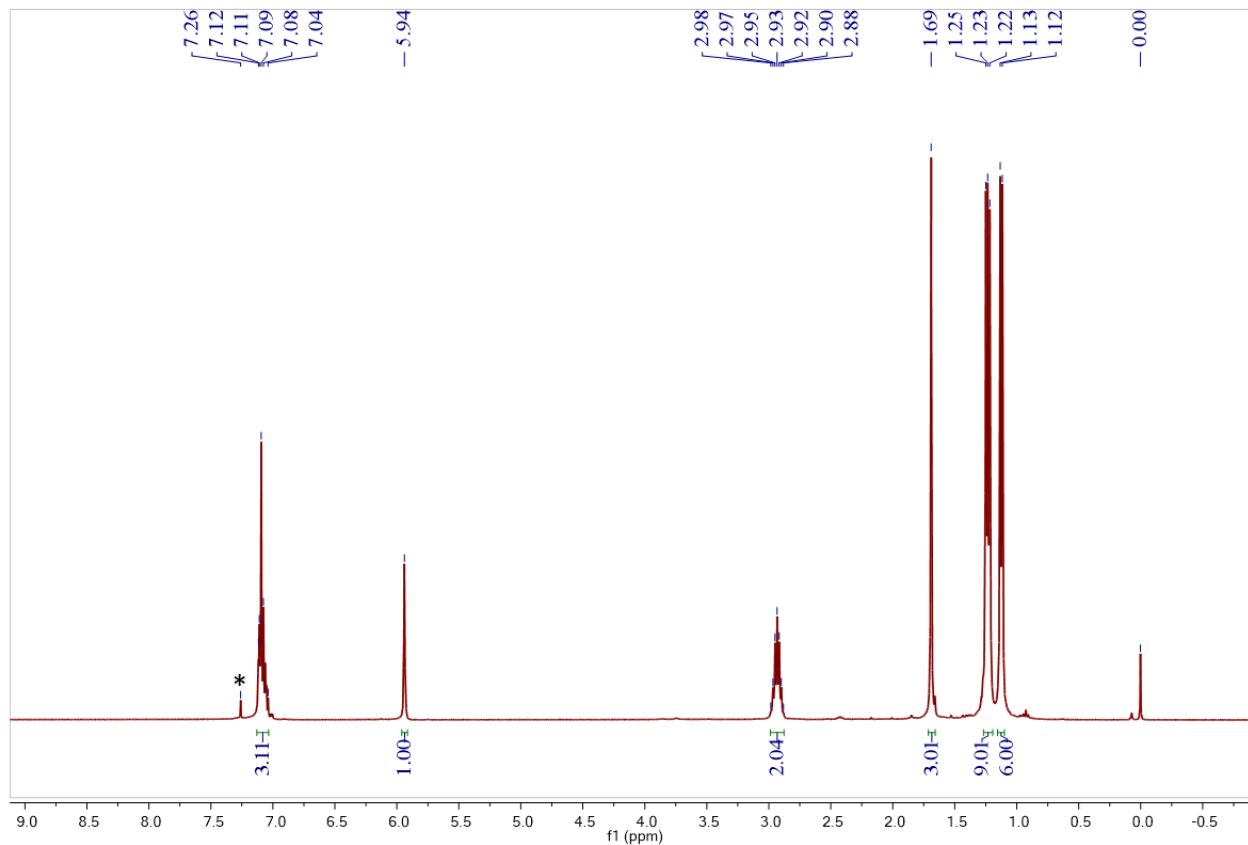

**Figure S9.**  $^1\text{H}$  NMR spectrum of  $[\text{L}_1\text{Cu}]_3$  in  $\text{CDCl}_3$  (400 MHz, 298 K). Solvent residual peaks are marked with an asterisk (\*).



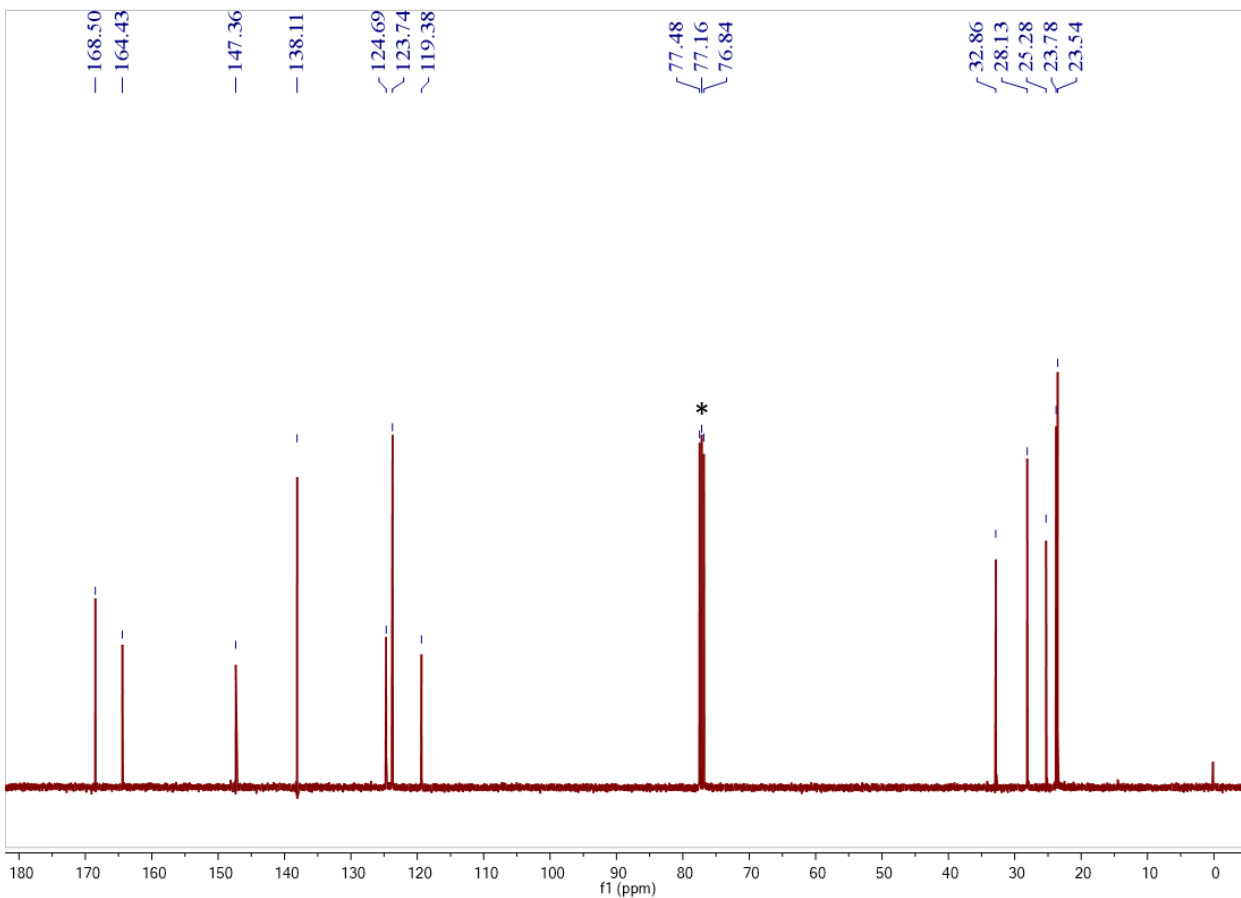

**Figure S10.**  $^{13}\text{C}$  NMR spectrum of  $[\text{L}_1\text{Cu}]_3$  in  $\text{CDCl}_3$  (100 MHz, 298 K). Solvent residual peaks are marked with an asterisk (\*).

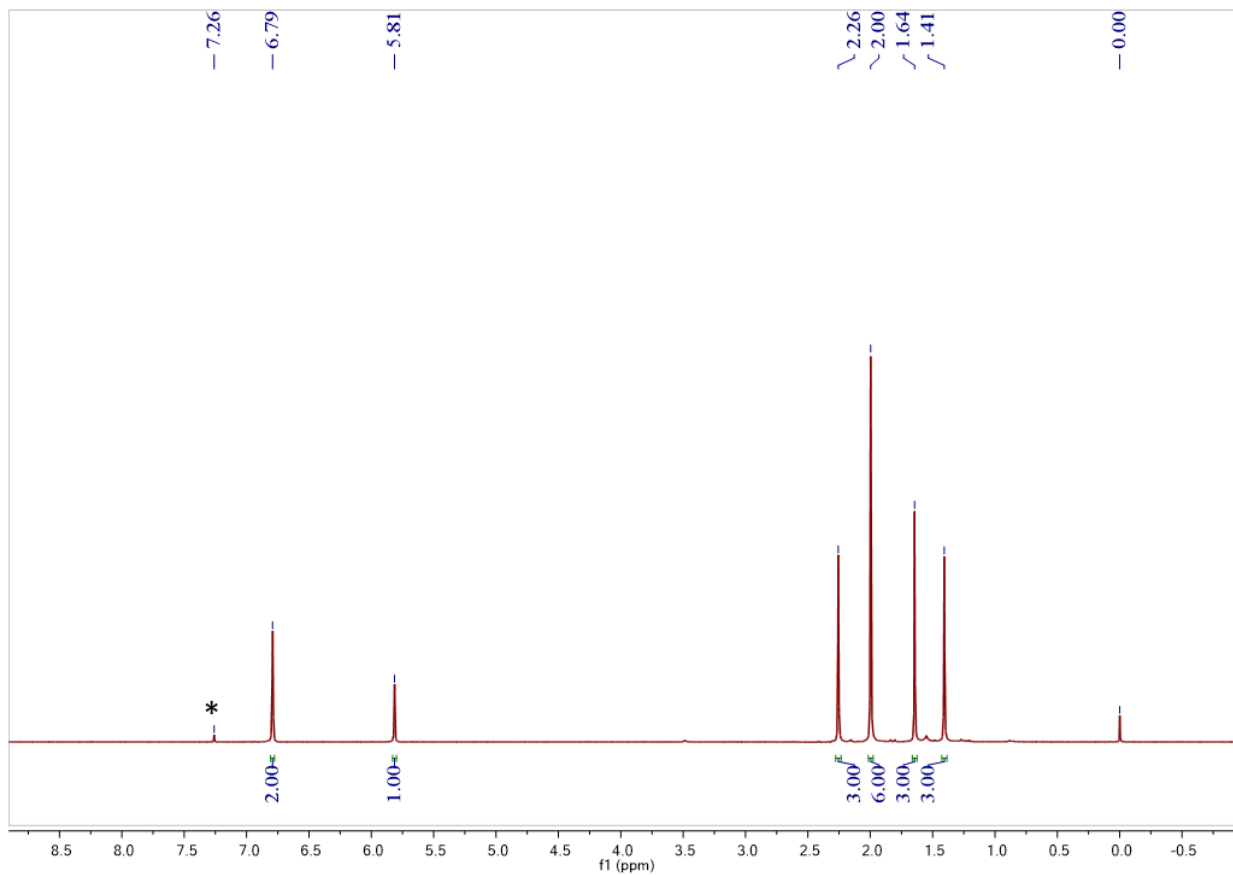

**Figure S11.** <sup>1</sup>H NMR spectrum of [L<sub>2</sub>Cu]<sub>3</sub> in CDCl<sub>3</sub> (400 MHz, 298 K). Solvent residual peaks are marked with an asterisk (\*).

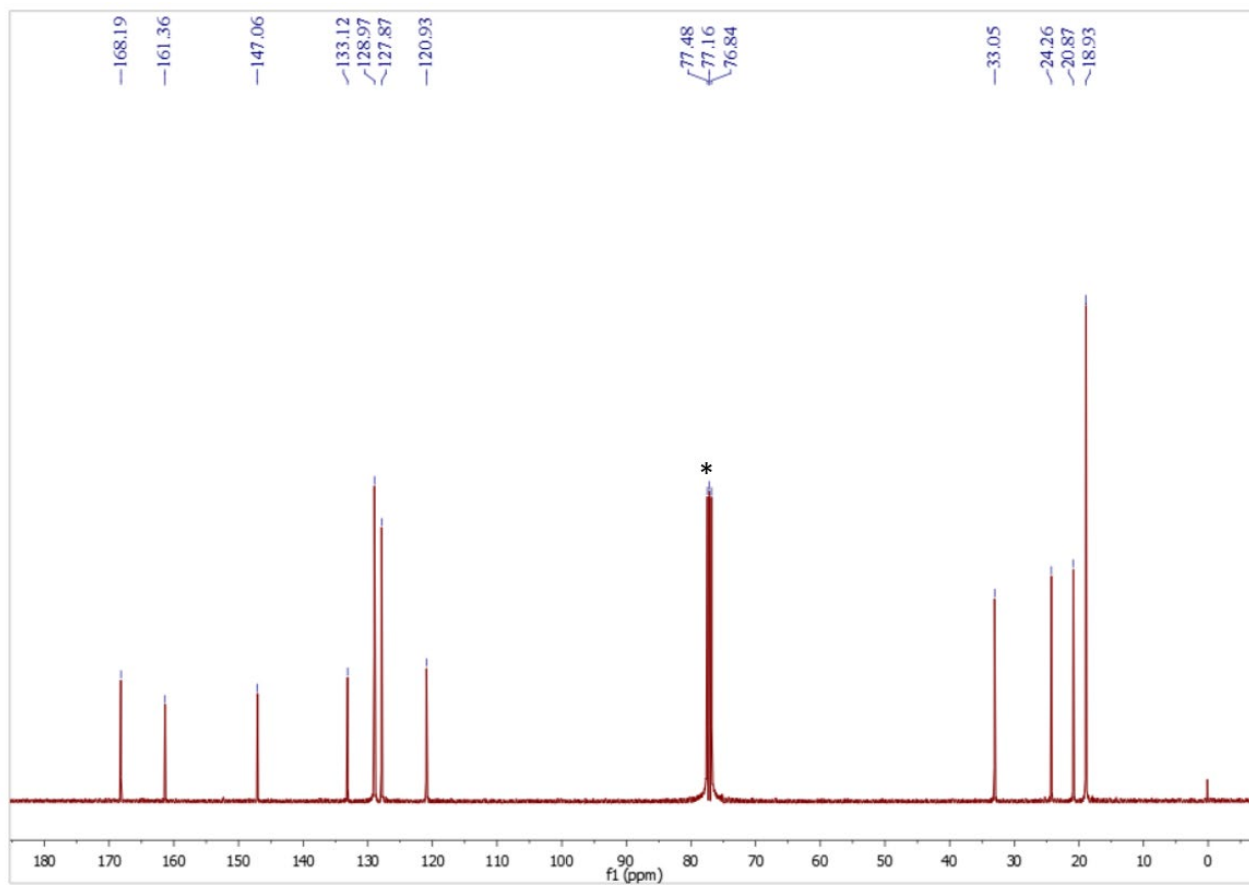

**Figure S12.**  $^{13}\text{C}$  NMR spectrum of  $[\text{L}_2\text{Cu}]_3$  in  $\text{CDCl}_3$  (100 MHz, 298 K). Solvent residual peaks are marked with an asterisk (\*).

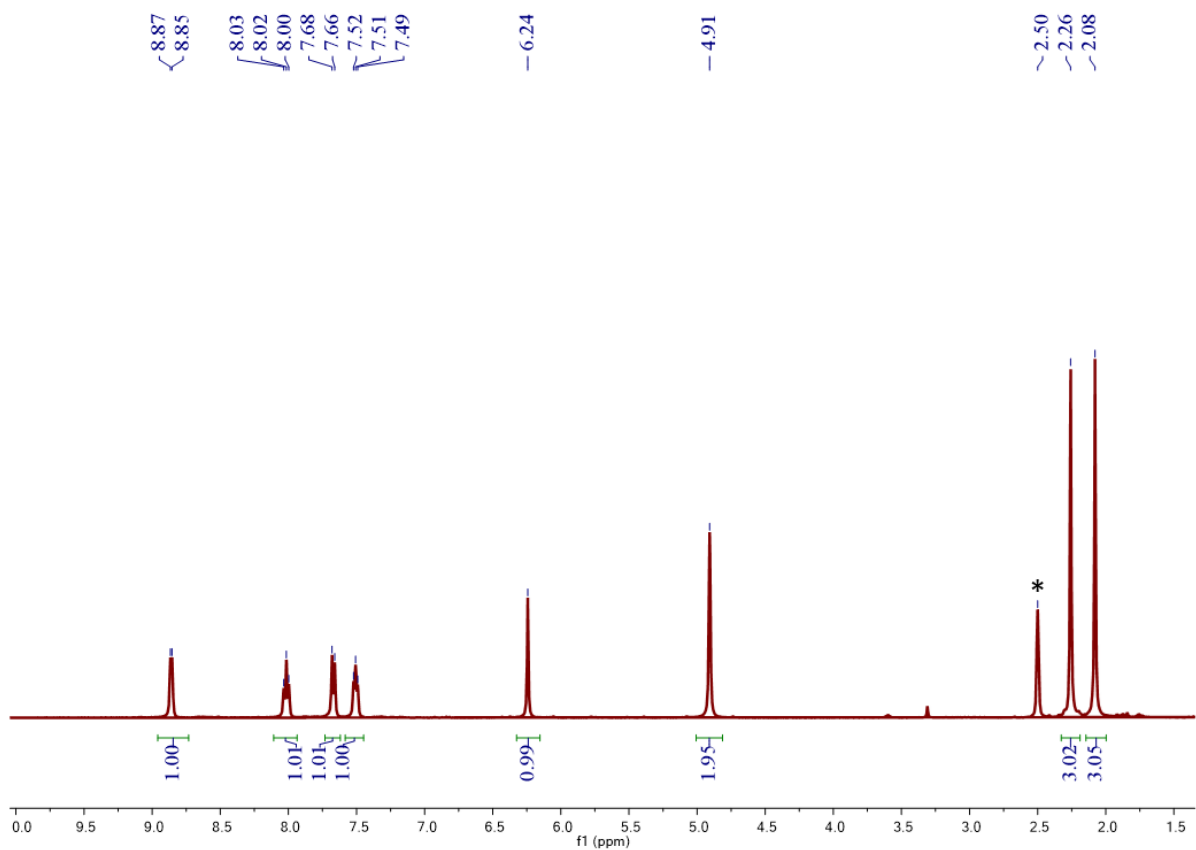

**Figure S13.**  $^1\text{H}$  NMR spectrum of  $\text{L}_3\text{Cu}$  in  $\text{DMSO-D}_6$  (400 MHz, 298 K). Solvent residual peaks are marked with an asterisk (\*).

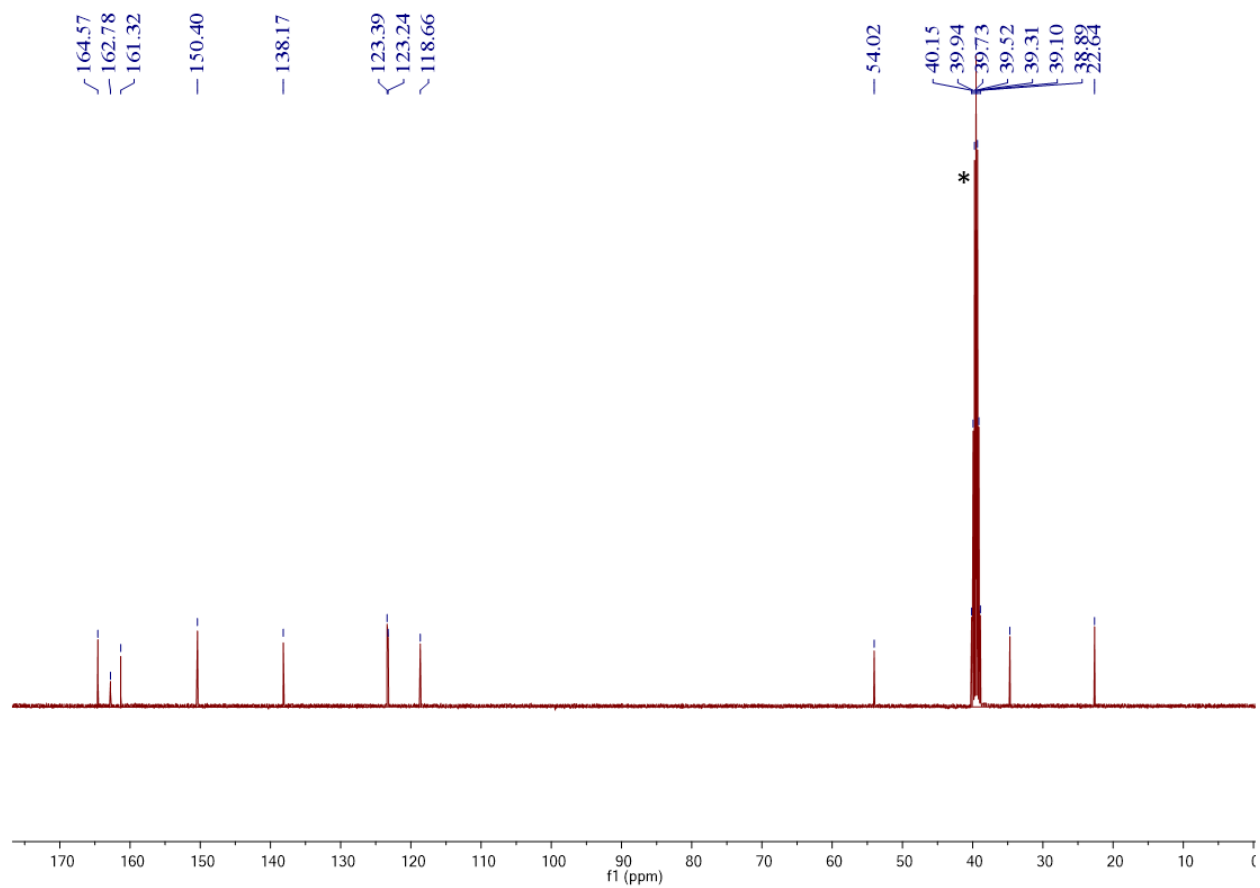

**Figure S14.**  $^{13}\text{C}$  NMR spectrum of  $\text{L}_3\text{Cu}$  in  $\text{DMSO-D}_6$  (100 MHz, 298 K). Solvent residual peaks are marked with an asterisk (\*).

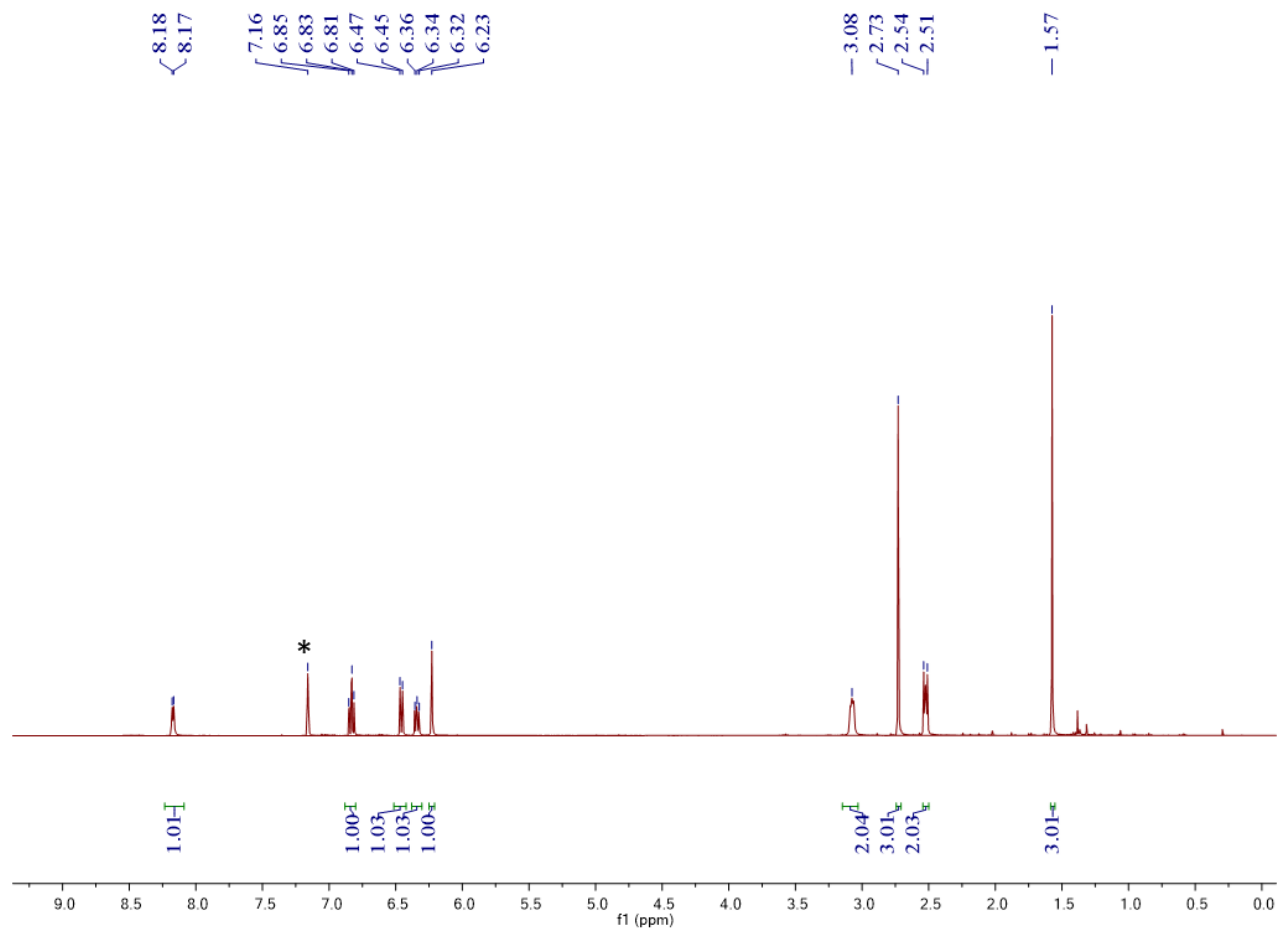

**Figure S15.**  $^1\text{H}$  NMR spectrum of  $\text{L}_4\text{Cu}$  in  $\text{C}_6\text{D}_6$  (400 MHz, 298 K). Solvent residual peaks are marked with an asterisk (\*).

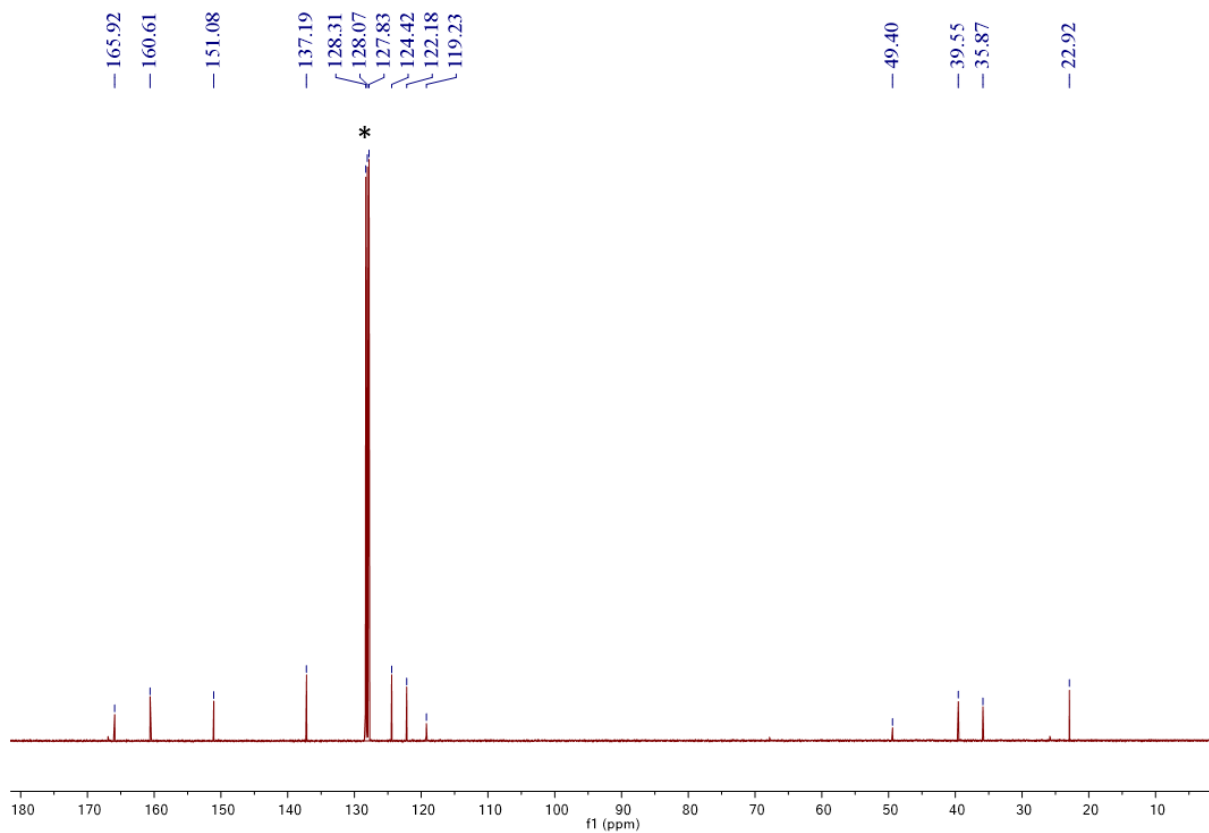

**Figure S16.**  $^{13}\text{C}$  NMR spectrum of  $\text{L}_4\text{Cu}$  in  $\text{C}_6\text{D}_6$  (100 MHz, 298 K). Solvent residual peaks are marked with an asterisk (\*).

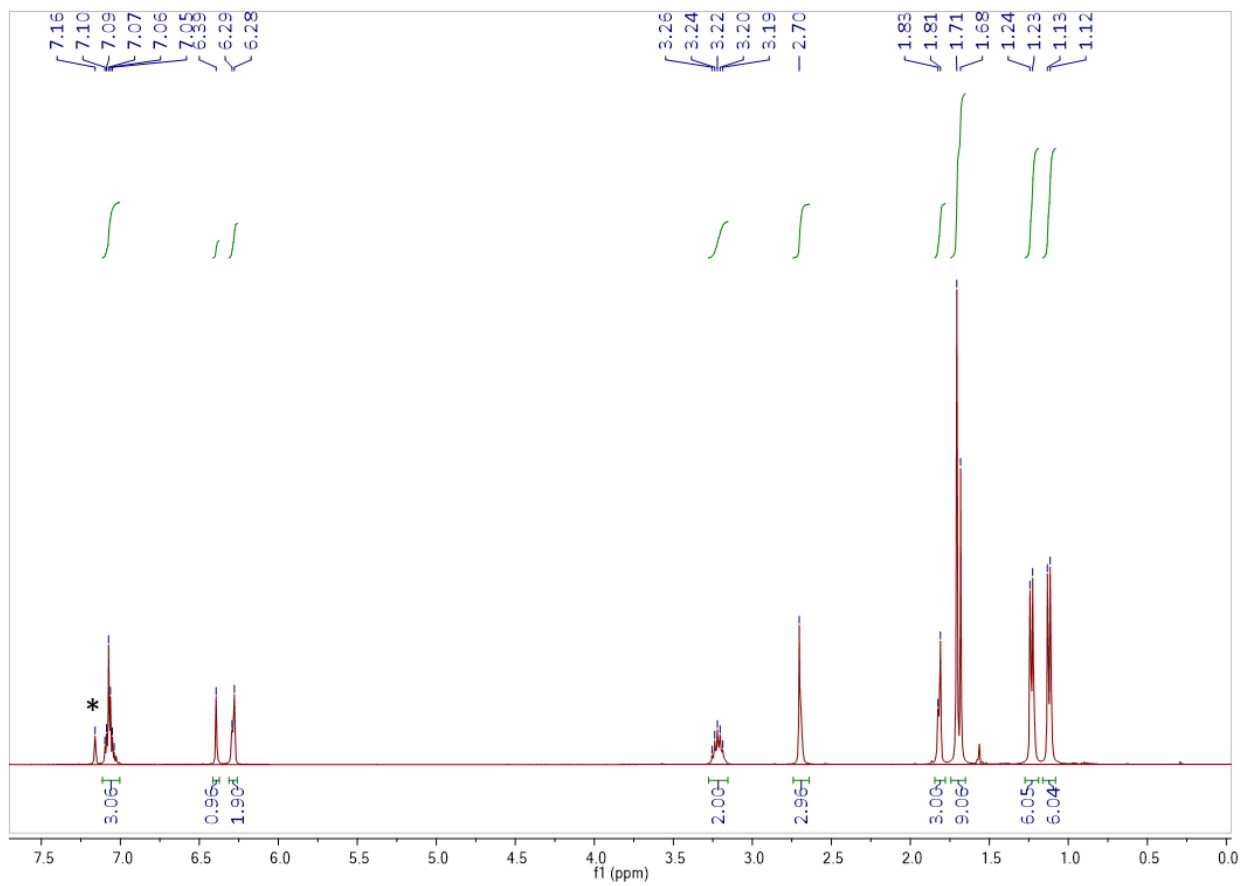

**Figure S17.**  $^1\text{H}$  NMR spectrum of  $\text{L}_1\text{Cu}(2,4,6\text{-CNC}_6\text{H}_2\text{Me}_3)$  in  $\text{C}_6\text{D}_6$  (400 MHz, 298 K). Solvent residual peaks are marked with an asterisk (\*).



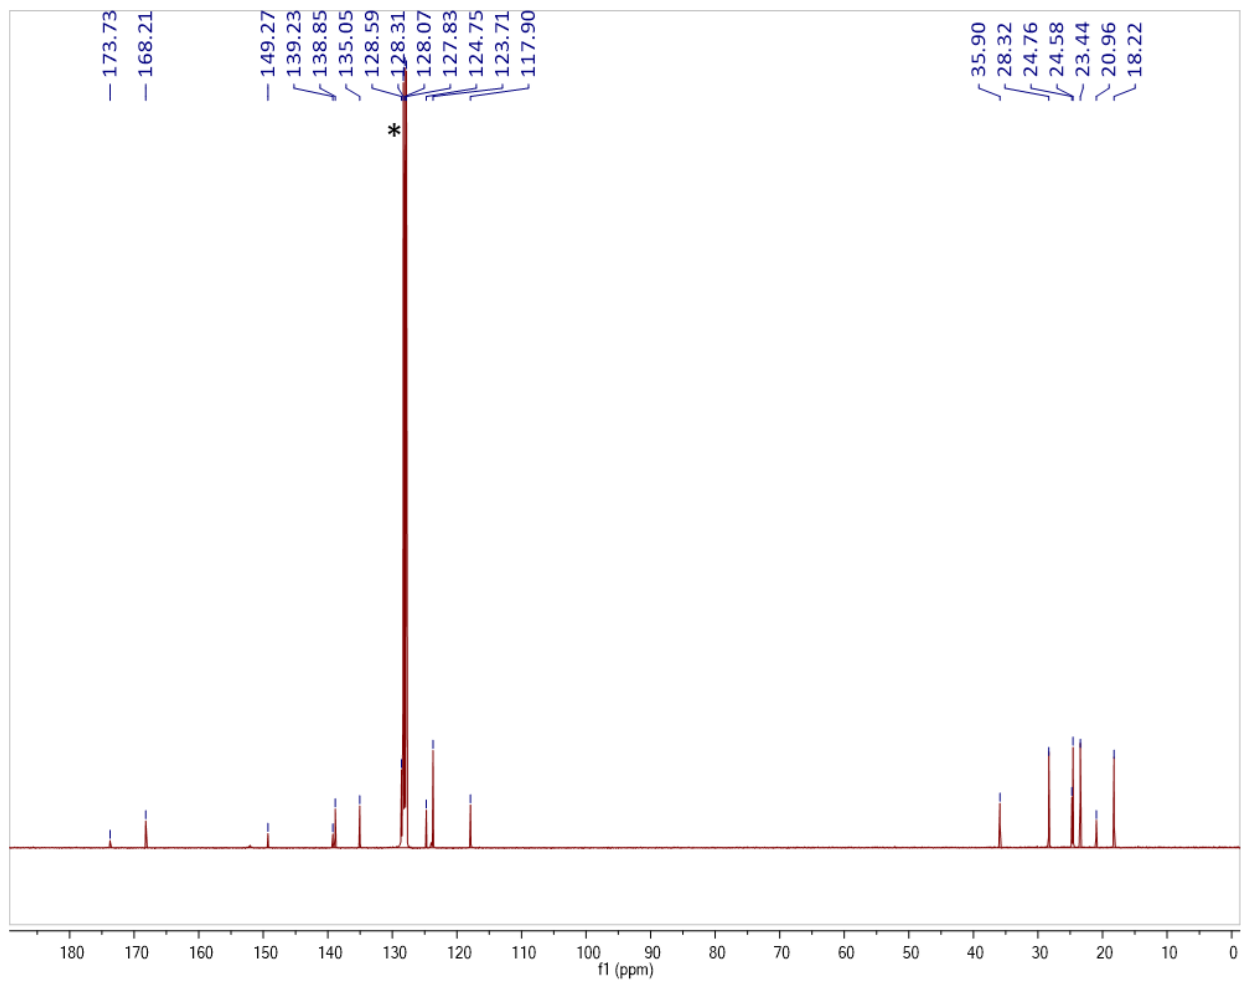

**Figure S18.**  $^{13}\text{C}$  NMR spectrum of  $\text{LiCu}(2,4,6\text{-CNC}_6\text{H}_2\text{Me}_3)$  in  $\text{C}_6\text{D}_6$  (100 MHz, 298 K). Solvent residual peaks are marked with an asterisk (\*).

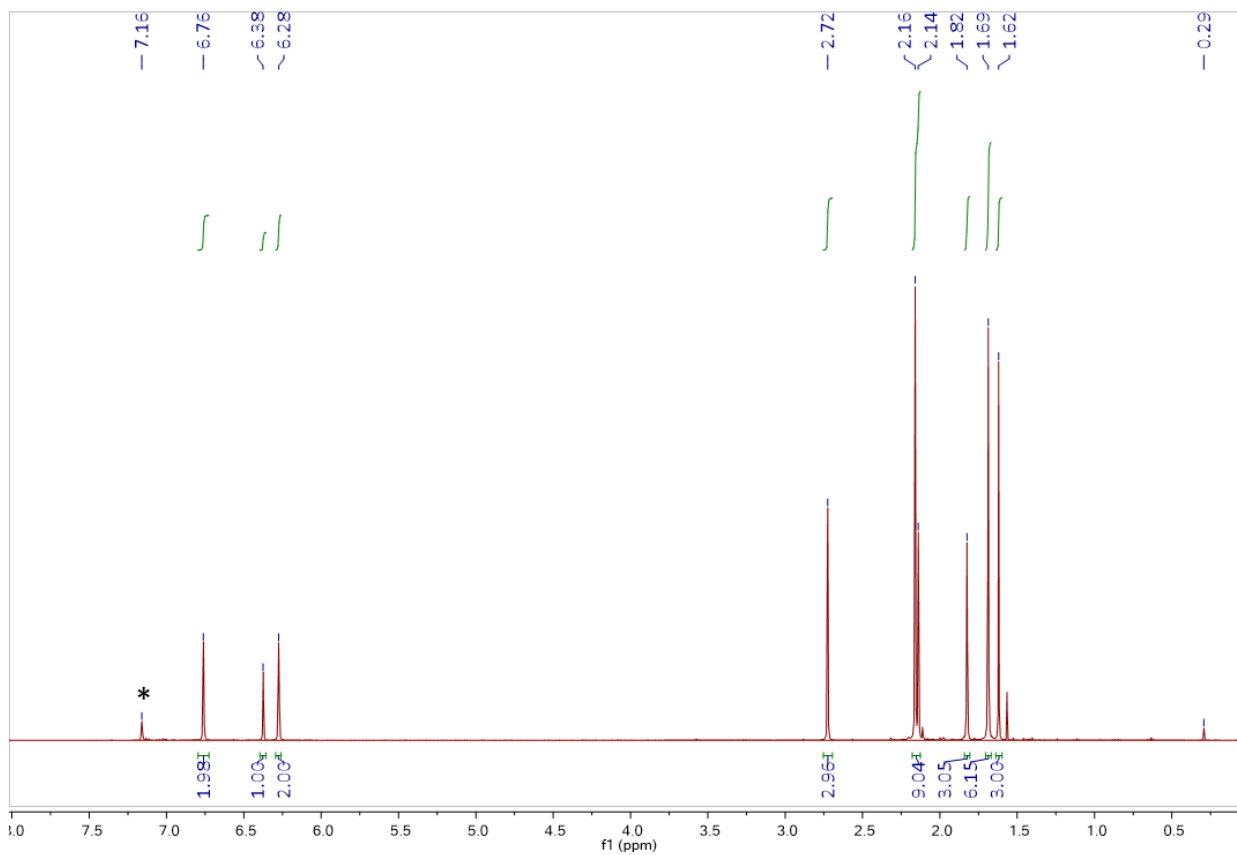

**Figure S19.**  $^1\text{H}$  NMR spectrum of  $\text{L}_2\text{Cu}(2,4,6\text{-CNC}_6\text{H}_2\text{Me}_3)$  in  $\text{C}_6\text{D}_6$  (400 MHz, 298 K). Solvent residual peaks are marked with an asterisk (\*).

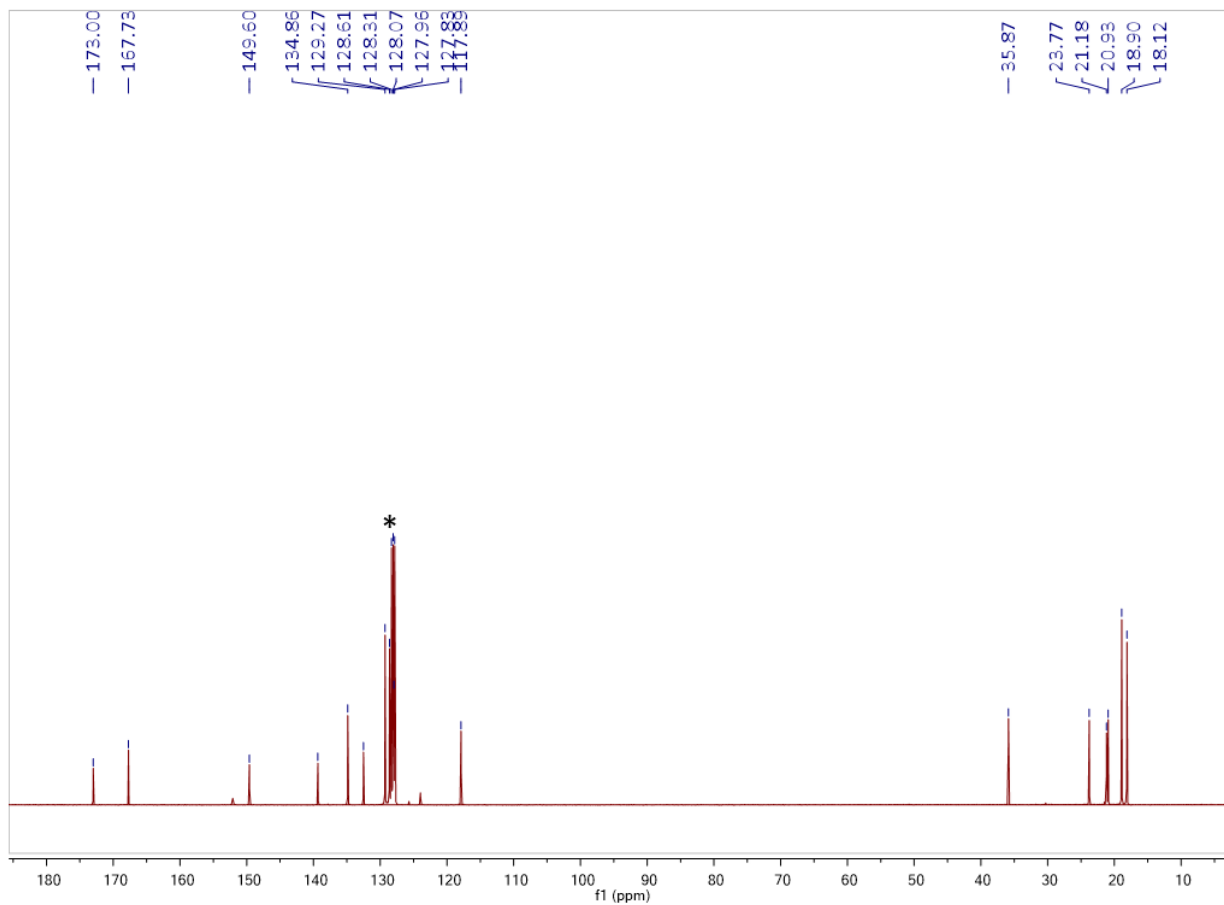

**Figure S20.** <sup>13</sup>C NMR spectrum of  $L_2Cu(2,4,6-CNC_6H_2Me_3)$  in  $C_6D_6$  (100 MHz, 298 K). Solvent residual peaks are marked with an asterisk (\*).

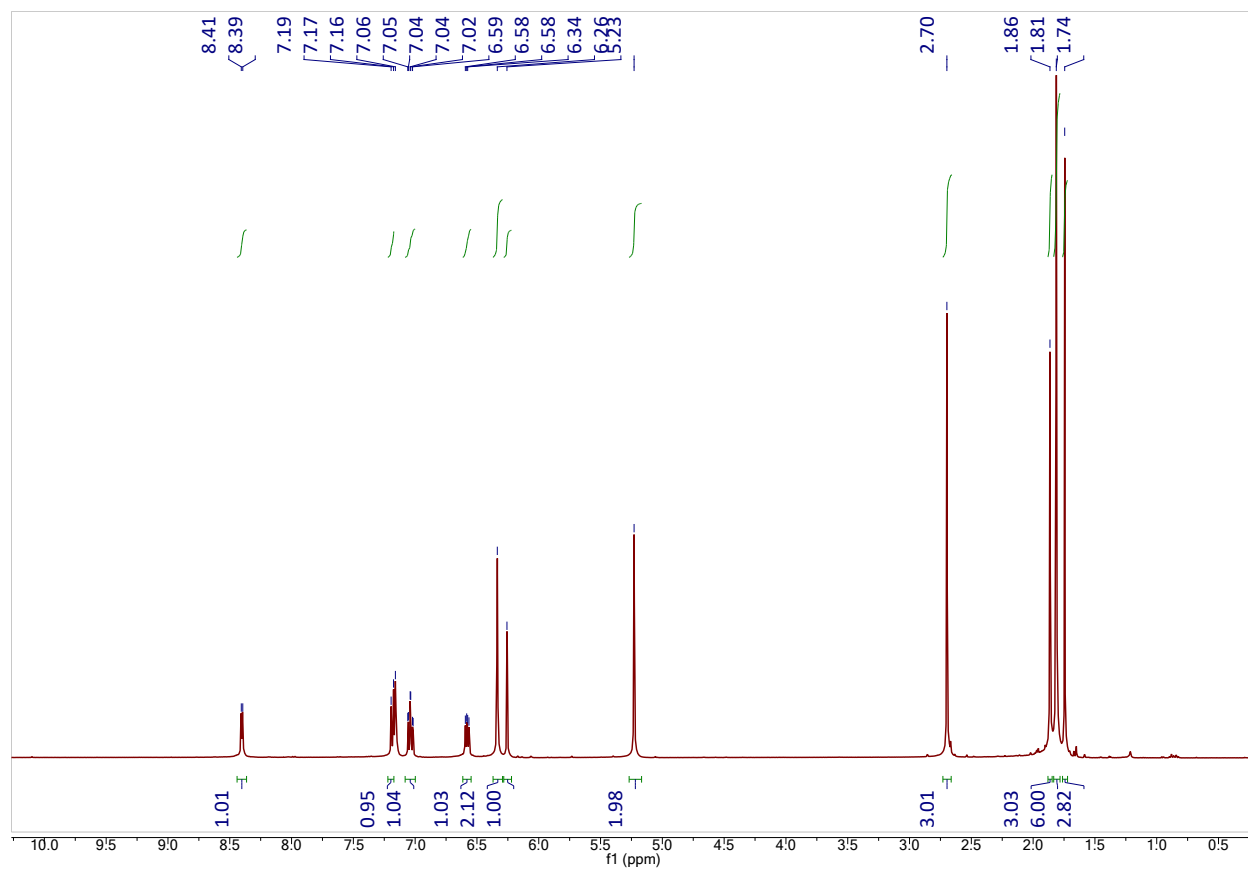

**Figure S21.**  $^1\text{H}$  NMR spectrum of  $\text{L}_3\text{Cu}(2,4,6\text{-CNC}_6\text{H}_2\text{Me}_3)$  in  $\text{C}_6\text{D}_6$  (400 MHz, 298 K).

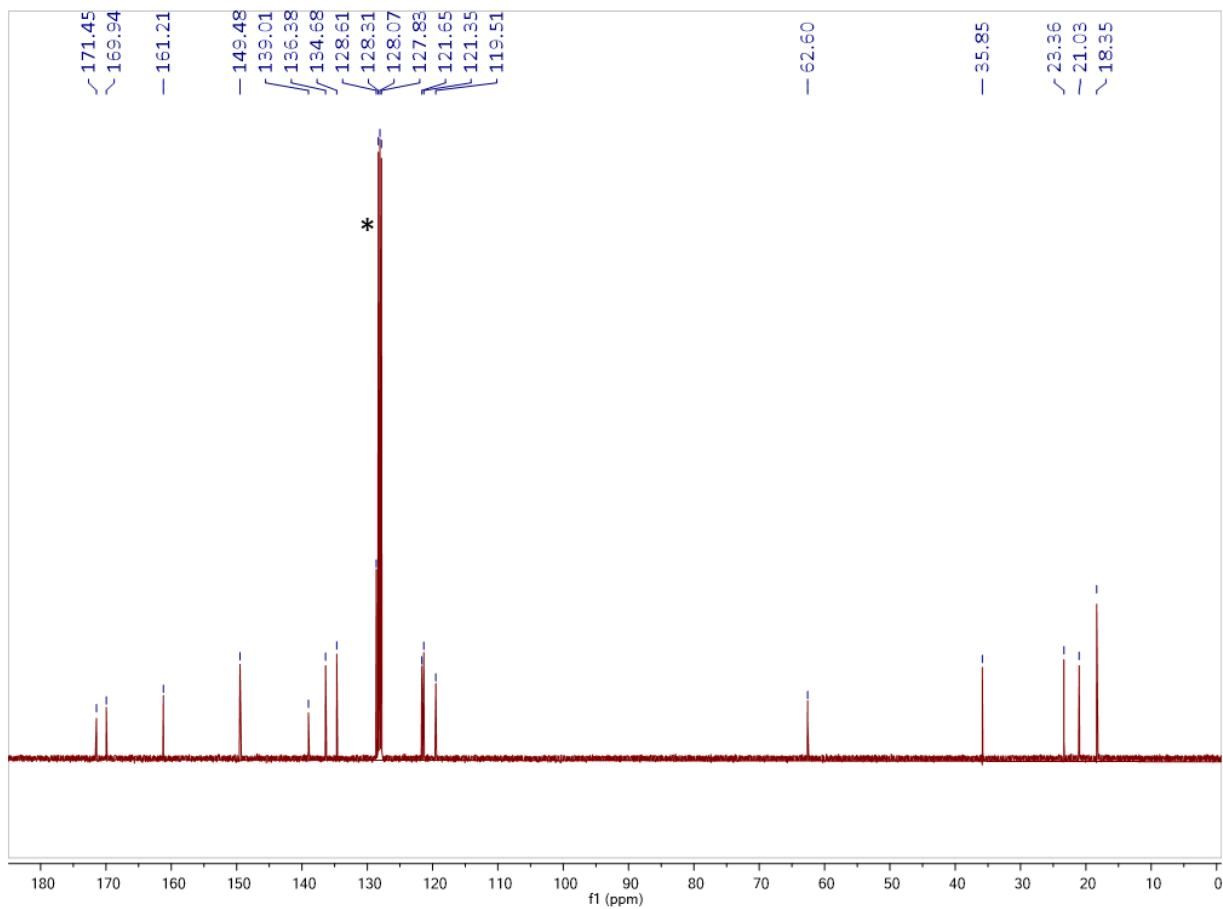

**Figure S22.**  $^{13}\text{C}$  NMR spectrum of  $\text{L}_3\text{Cu}(2,4,6\text{-CNC}_6\text{H}_2\text{Me}_3)$  in  $\text{C}_6\text{D}_6$  (100 MHz, 298 K). Solvent residual peaks are marked with an asterisk (\*).

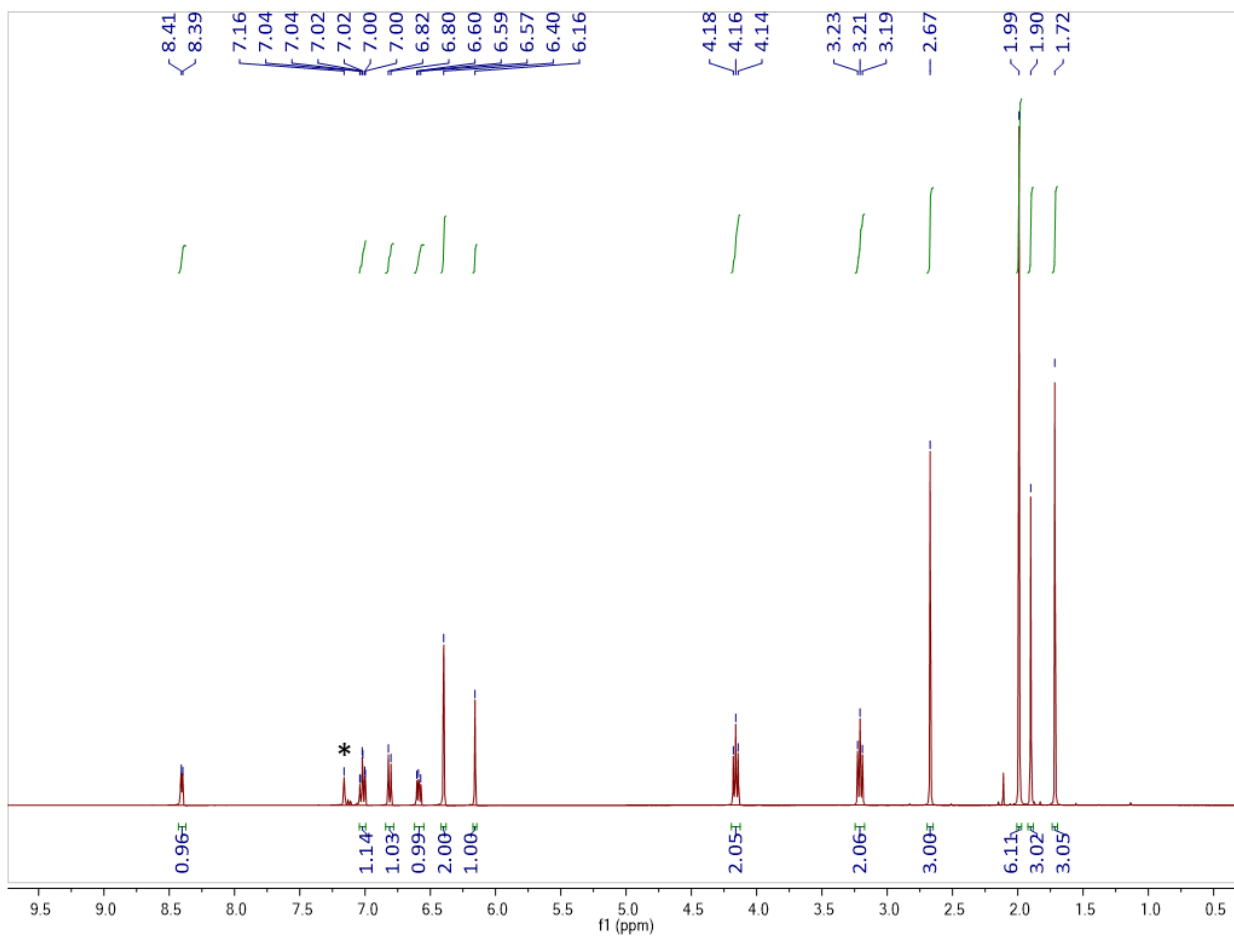

**Figure S23.**  $^1\text{H}$  NMR spectrum of  $\text{L}_4\text{Cu}(2,4,6\text{-CNC}_6\text{H}_2\text{Me}_3)$  in  $\text{C}_6\text{D}_6$  (400 MHz, 298 K). Solvent residual peaks are marked with an asterisk (\*).

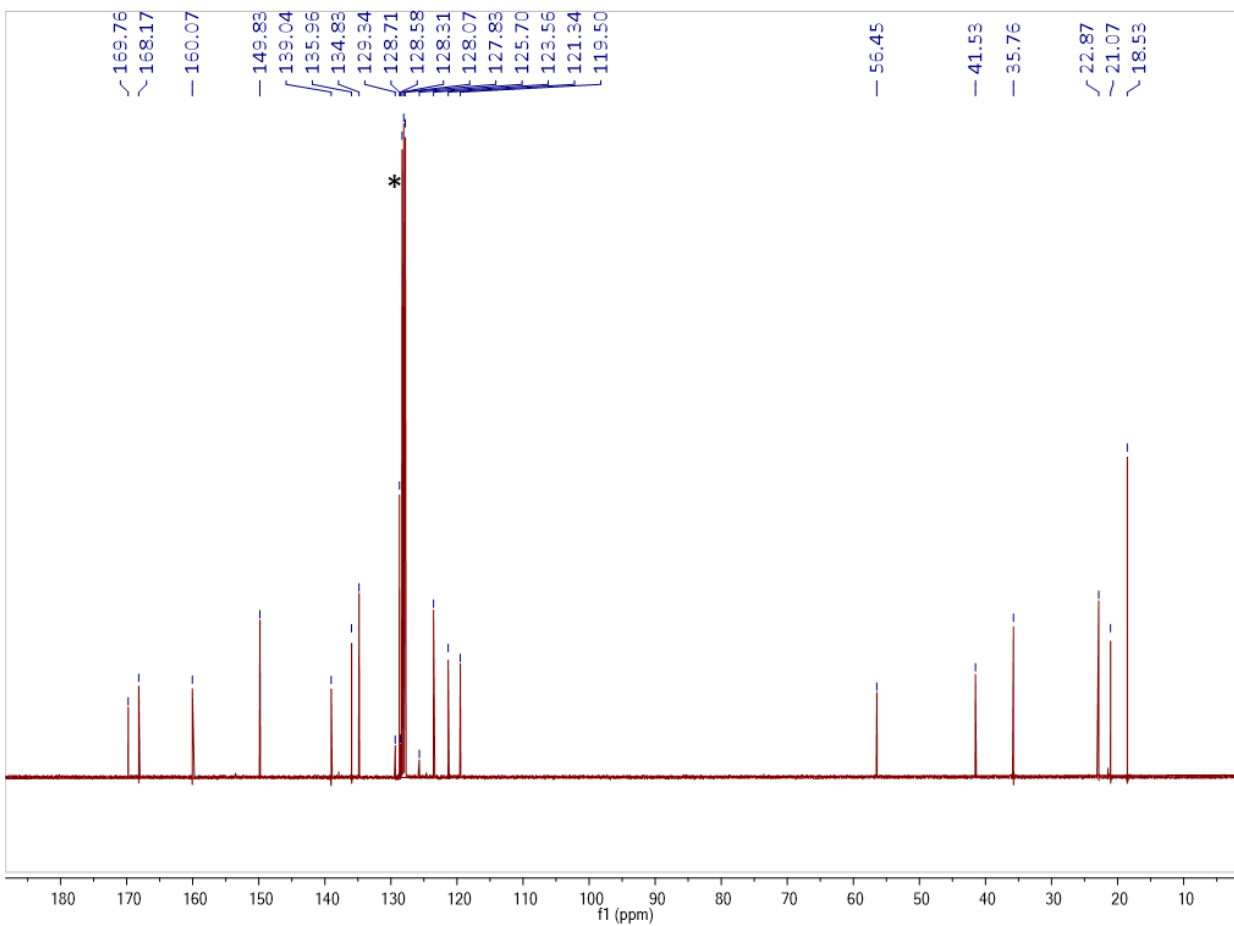

**Figure S24.**  $^{13}\text{C}$  NMR spectrum of  $\text{L}_4\text{Cu}(2,4,6\text{-CNC}_6\text{H}_2\text{Me}_3)$  in  $\text{C}_6\text{D}_6$  (100 MHz, 298 K). Solvent residual peaks are marked with an asterisk (\*).

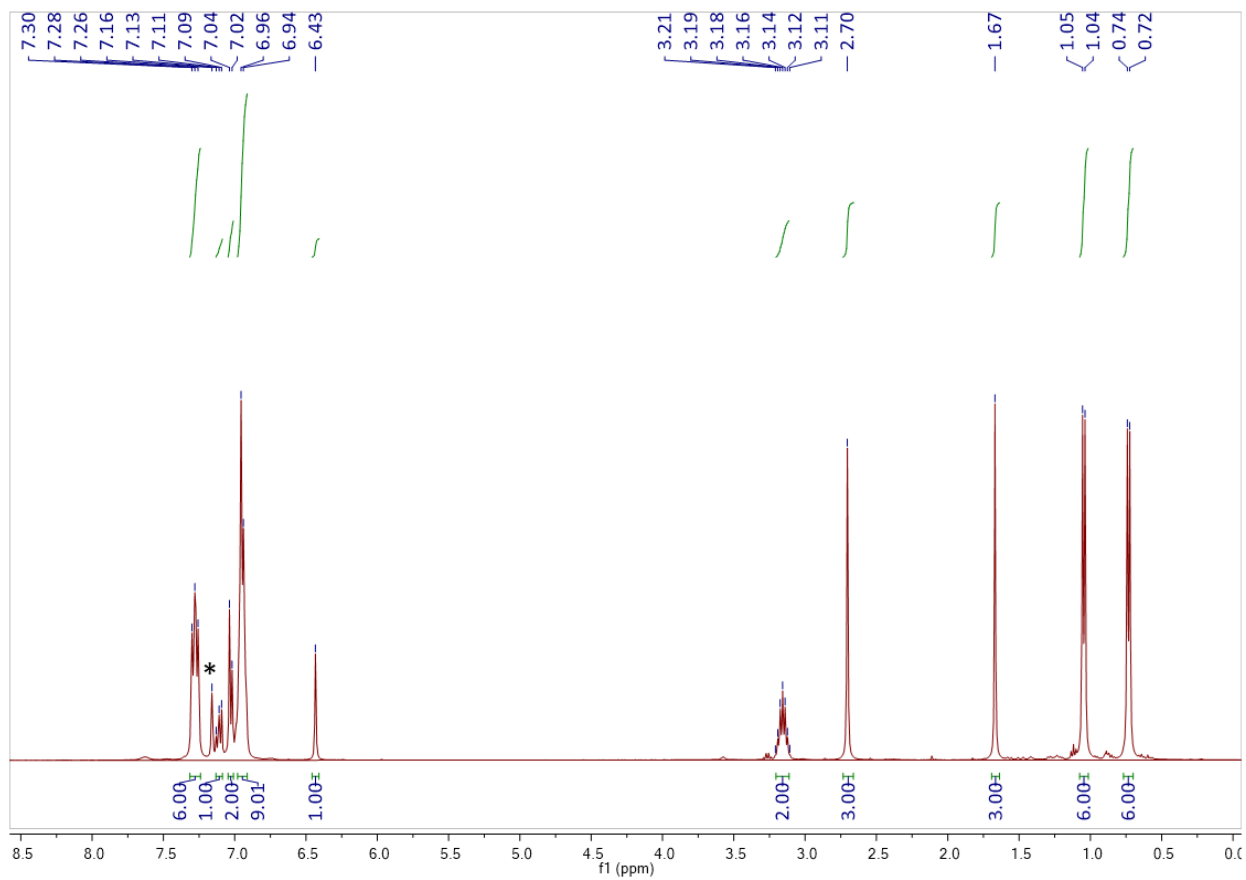

**Figure S25.**  $^1\text{H}$  NMR spectrum of  $\text{L}_1\text{Cu}(\text{PPh}_3)$  in  $\text{C}_6\text{D}_6$  (400 MHz, 298 K). Solvent residual peaks are marked with an asterisk (\*).



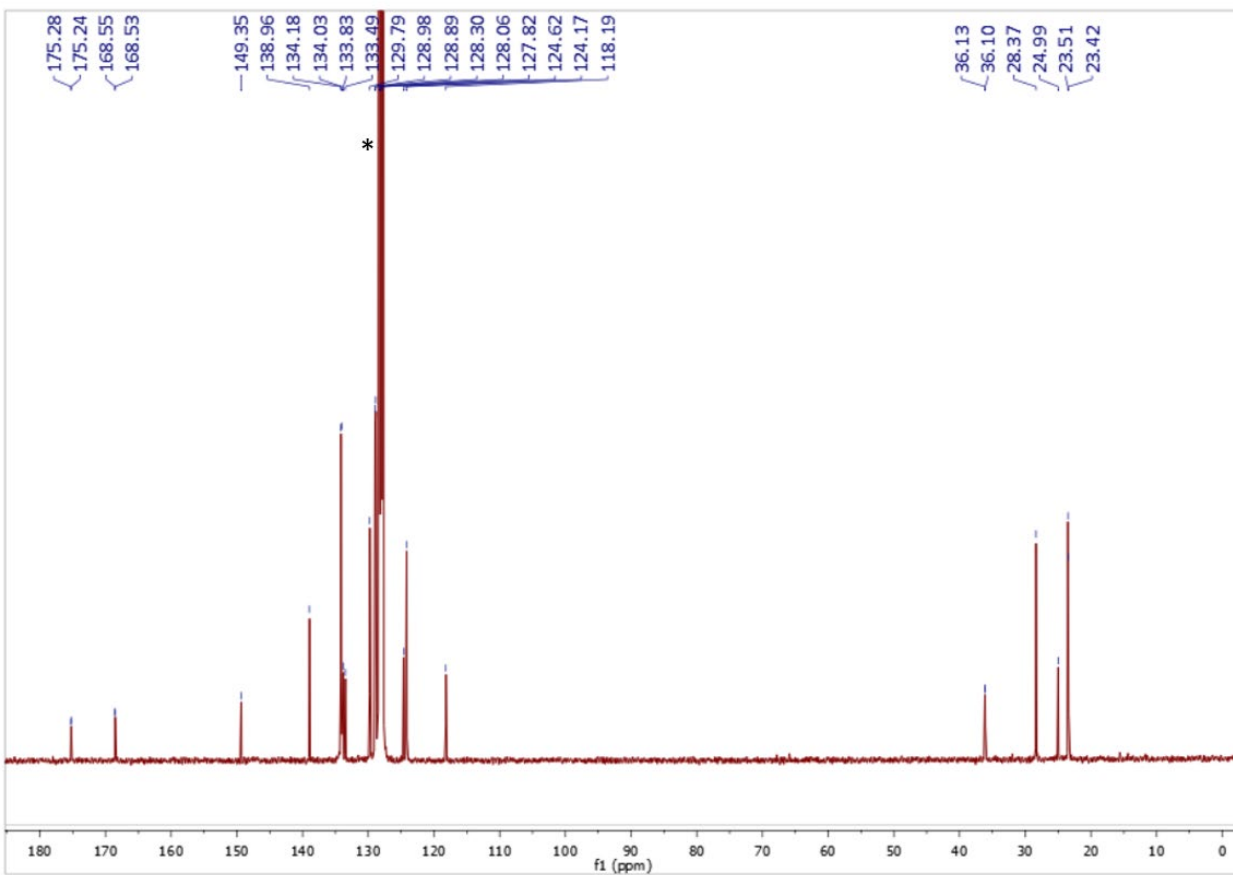

**Figure S26.**  $^{13}\text{C}$  NMR spectrum of  $\text{L}_1\text{Cu}(\text{PPh}_3)$  in  $\text{C}_6\text{D}_6$  (100 MHz, 298 K). Solvent residual peaks are marked with an asterisk (\*).

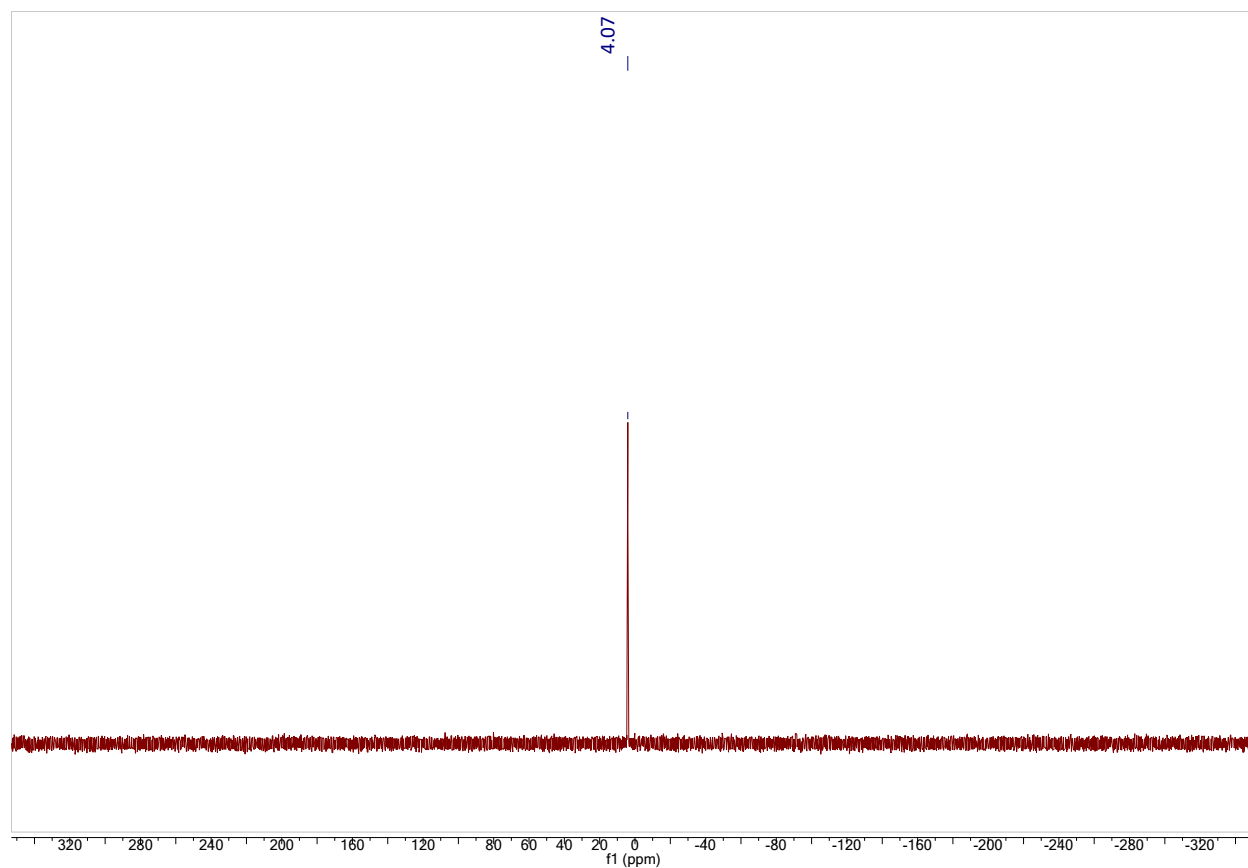

**Figure S27.**  $^{31}\text{P}$  NMR spectrum of  $\text{L}_1\text{Cu}(\text{PPh}_3)$  in  $\text{C}_6\text{D}_6$  (162 MHz, 298 K). Solvent residual peaks are marked with an asterisk (\*).

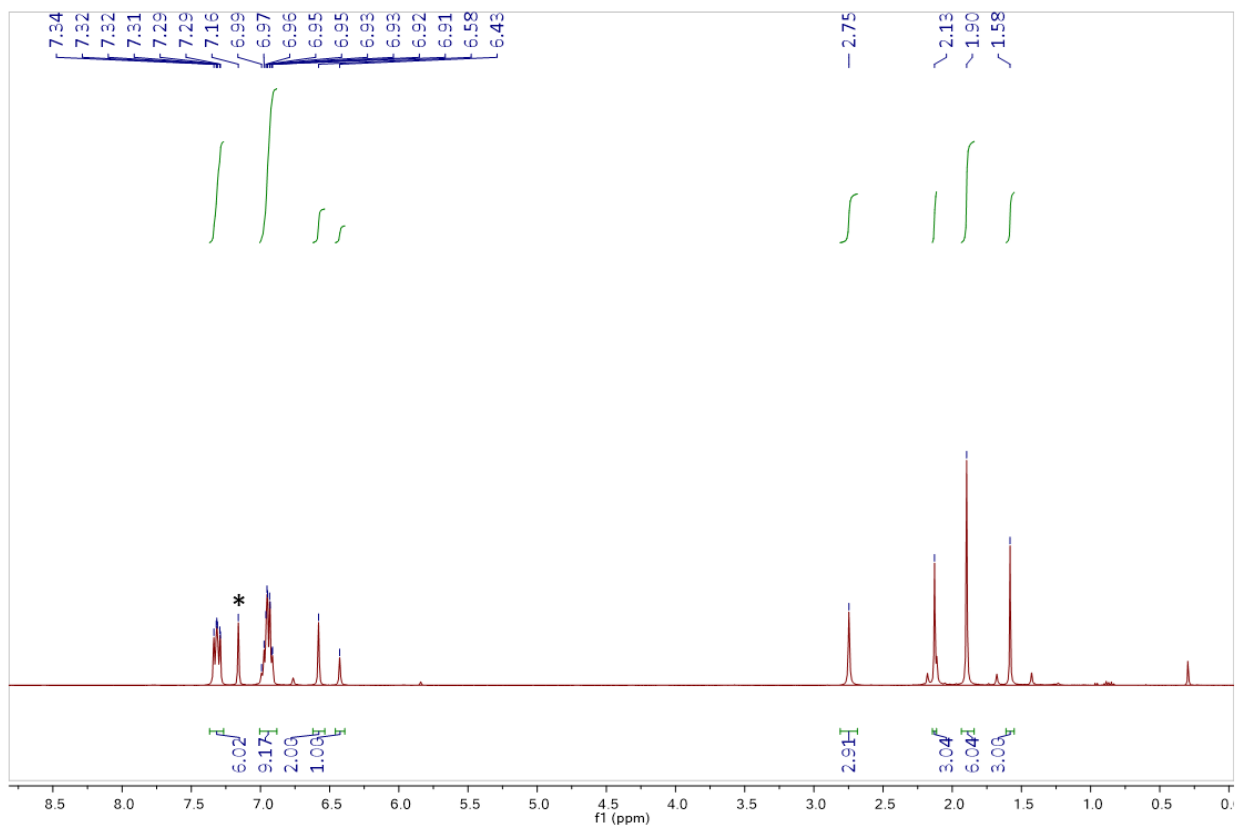

**Figure S28.**  $^1\text{H}$  NMR spectrum of  $\text{L}_2\text{Cu}(\text{PPh}_3)$  in  $\text{C}_6\text{D}_6$  (400 MHz, 298 K). Solvent residual peaks are marked with an asterisk (\*).

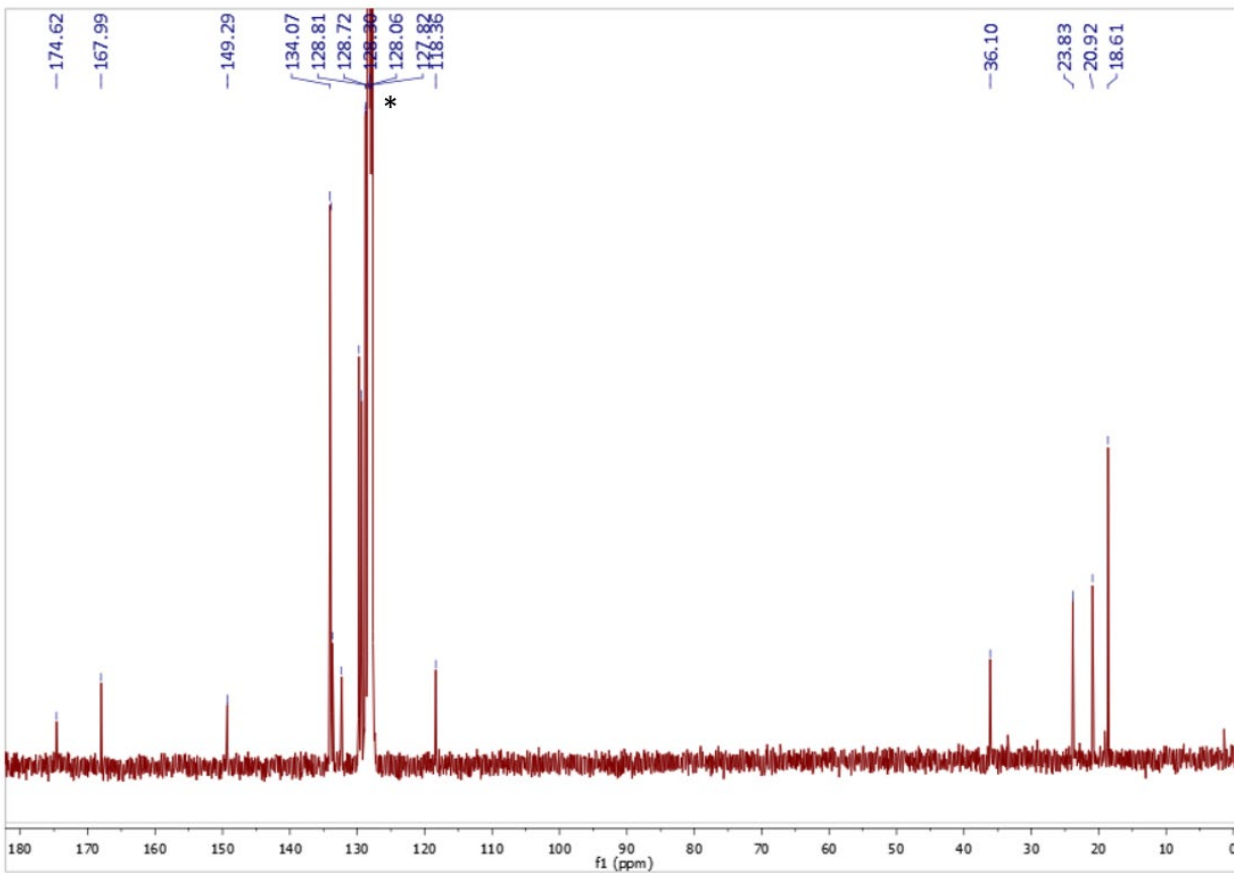

**Figure S29.**  $^{13}\text{C}$  NMR spectrum of  $\text{L}_2\text{Cu}(\text{PPh}_3)$  in  $\text{C}_6\text{D}_6$  (100 MHz, 298 K). Solvent residual peaks are marked with an asterisk (\*).

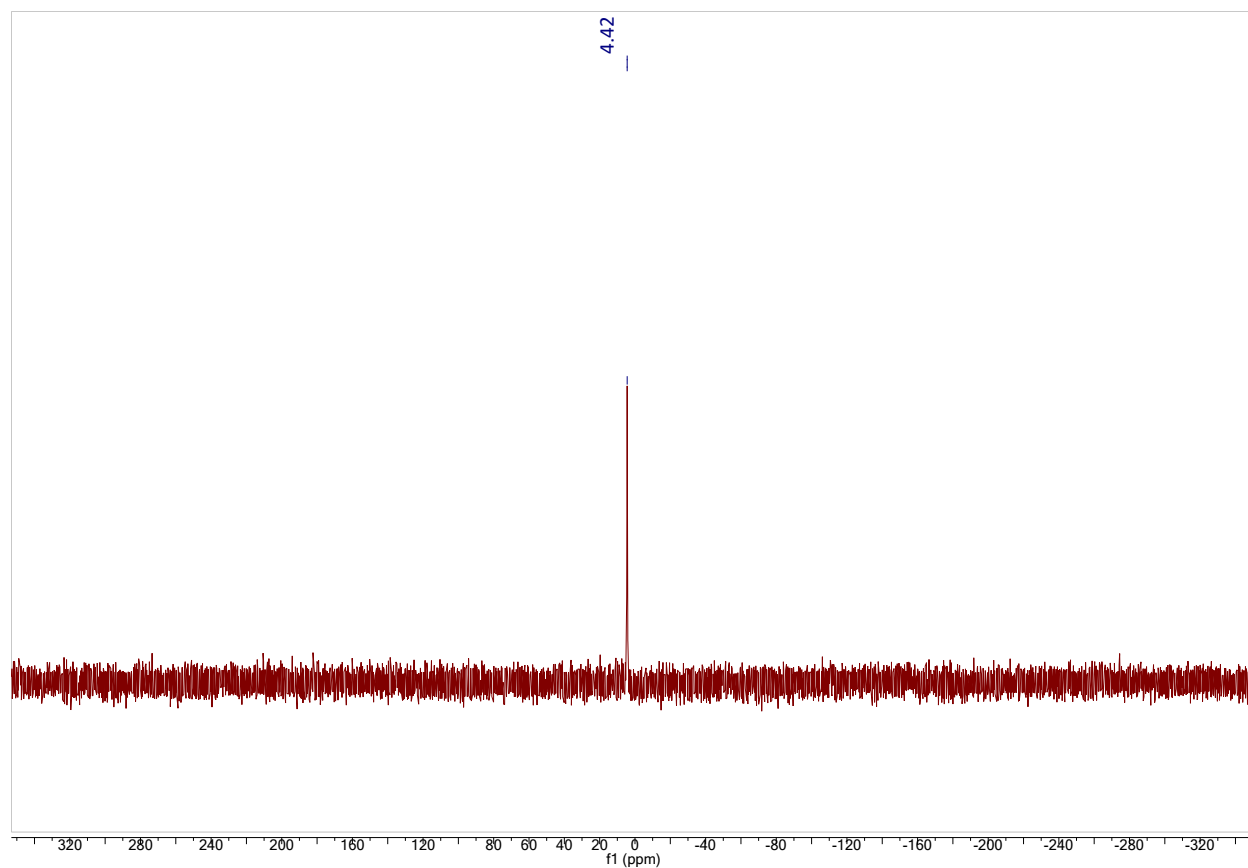

**Figure S30.**  $^{31}\text{P}$  NMR spectrum of  $\text{L}_2\text{Cu}(\text{PPh}_3)$  in  $\text{C}_6\text{D}_6$  (162 MHz, 298 K). Solvent residual peaks are marked with an asterisk (\*).

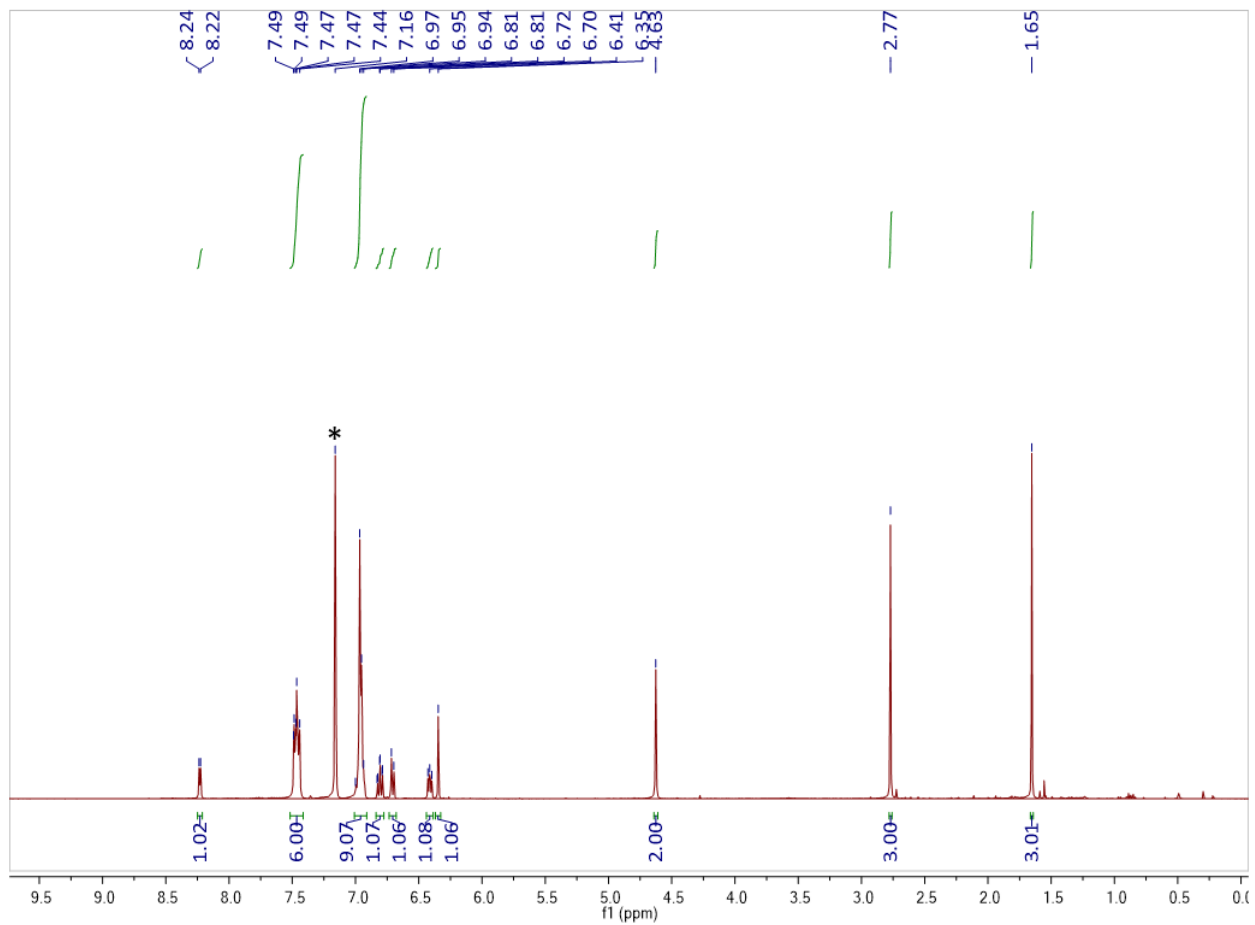

**Figure S31.**  $^1\text{H}$  NMR spectrum of  $\text{L}_3\text{Cu}(\text{PPh}_3)$  in  $\text{C}_6\text{D}_6$  (400 MHz, 298 K). Solvent residual peaks are marked with an asterisk (\*).

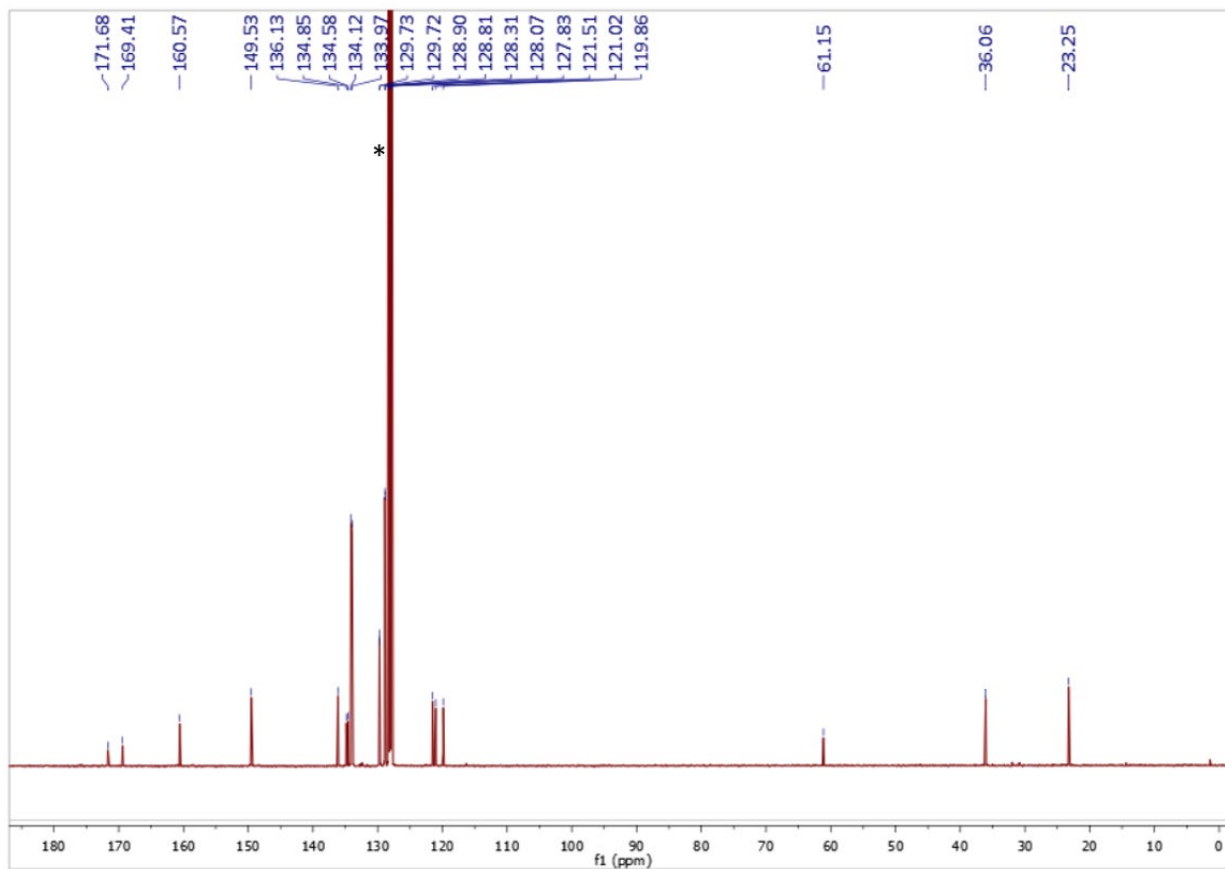

**Figure S32.**  $^{13}\text{C}$  NMR spectrum of  $\text{L}_3\text{Cu}(\text{PPh}_3)$  in  $\text{C}_6\text{D}_6$  (100 MHz, 298 K). Solvent residual peaks are marked with an asterisk (\*).

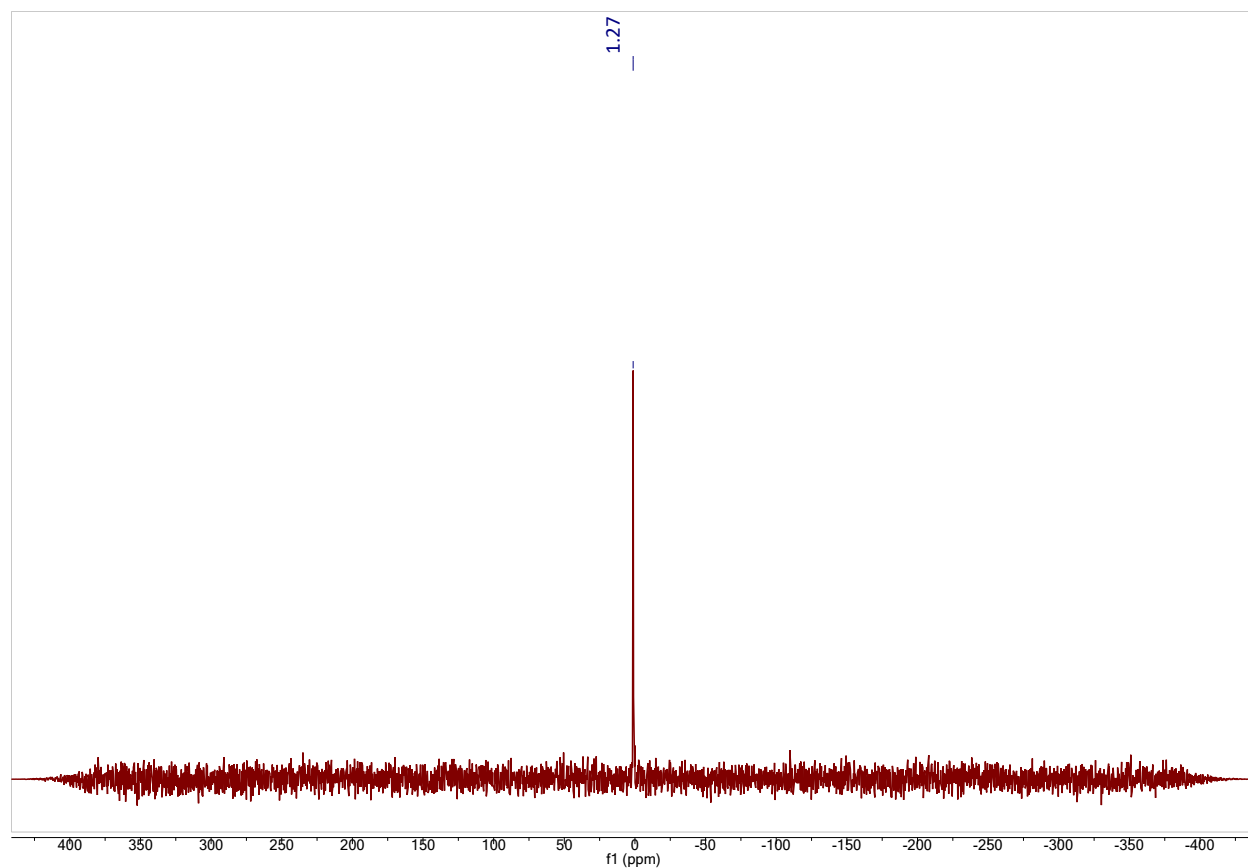

**Figure S33.**  $^{31}\text{P}$  NMR spectrum of  $\text{L}_3\text{Cu}(\text{PPh}_3)$  in  $\text{C}_6\text{D}_6$  (162 MHz, 298 K). Solvent residual peaks are marked with an asterisk (\*).



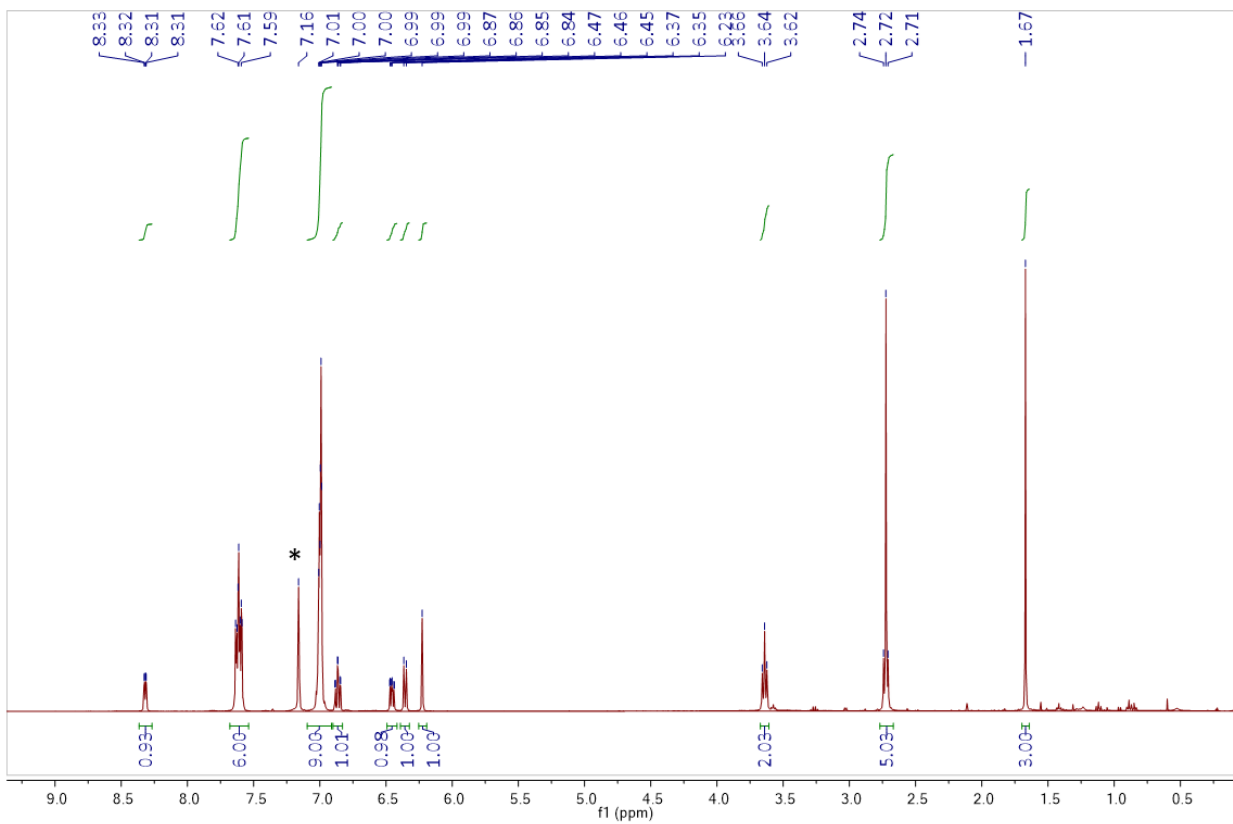

**Figure S34.**  $^1\text{H}$  NMR spectrum of  $\text{L}_4\text{Cu}(\text{PPh}_3)$  in  $\text{C}_6\text{D}_6$  (400 MHz, 298 K). Solvent residual peaks are marked with an asterisk (\*).

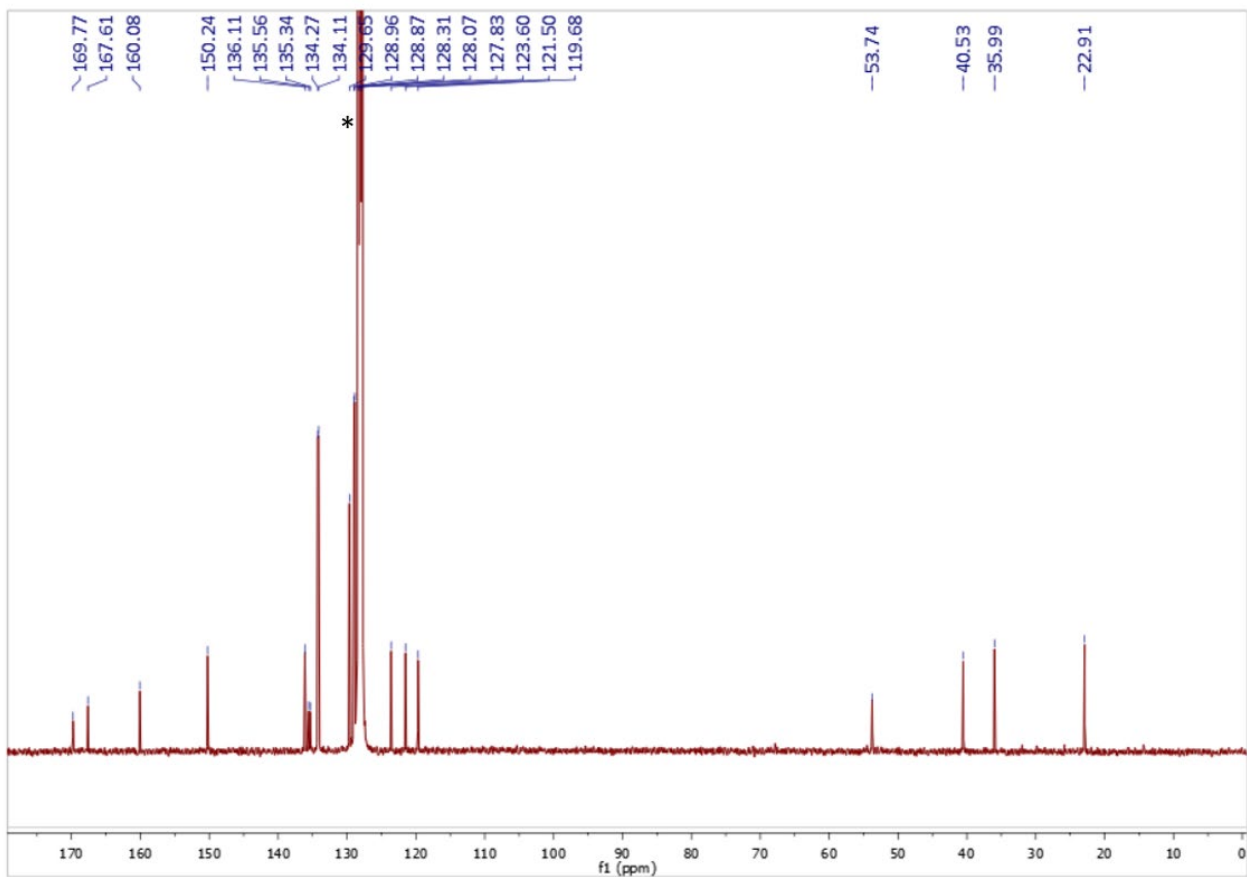

**Figure S35.**  $^{13}\text{C}$  NMR spectrum of  $\text{L}_4\text{Cu}(\text{PPh}_3)$  in  $\text{C}_6\text{D}_6$  (100 MHz, 298 K). Solvent residual peaks are marked with an asterisk (\*).

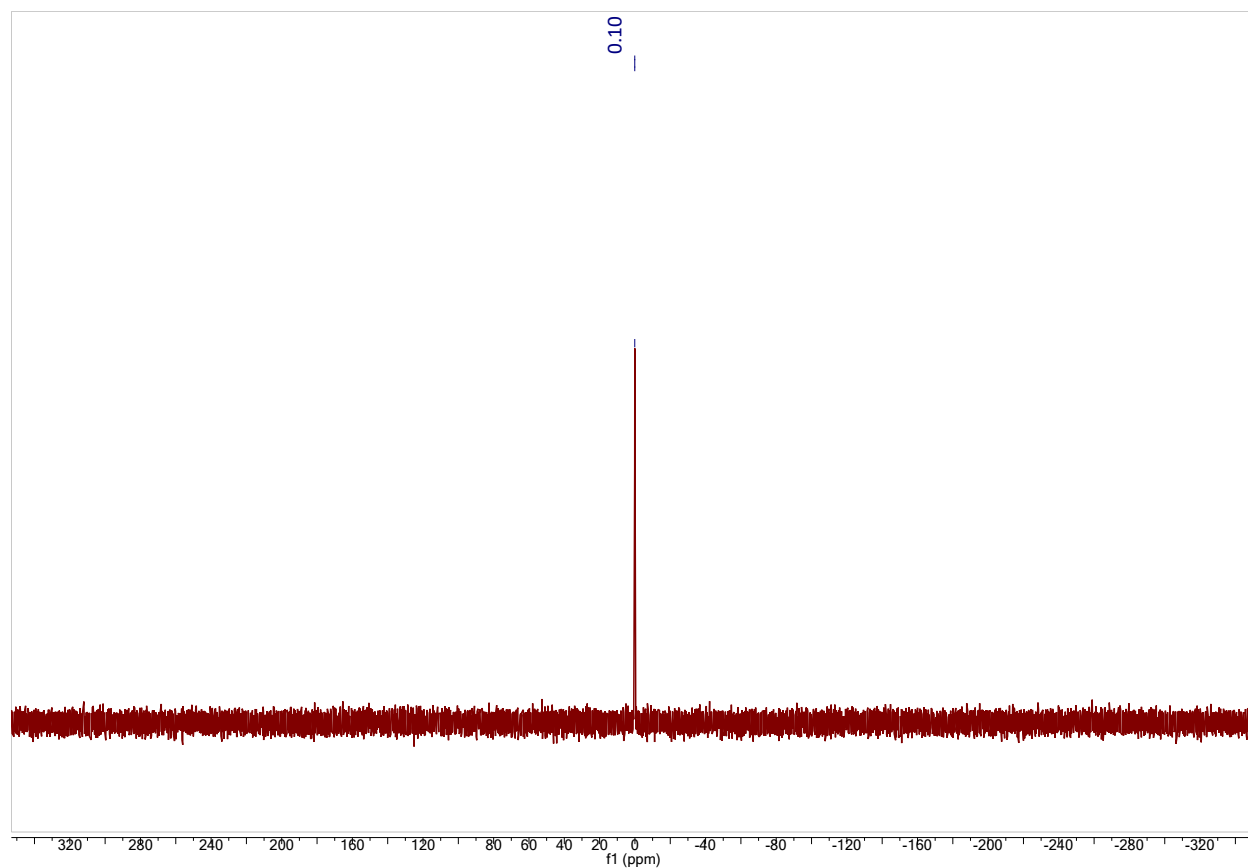

**Figure S36.**  $^{31}\text{P}$  NMR spectrum of  $\text{L}_4\text{Cu}(\text{PPh}_3)$  in  $\text{C}_6\text{D}_6$  (162 MHz, 298 K). Solvent residual peaks are marked with an asterisk (\*).

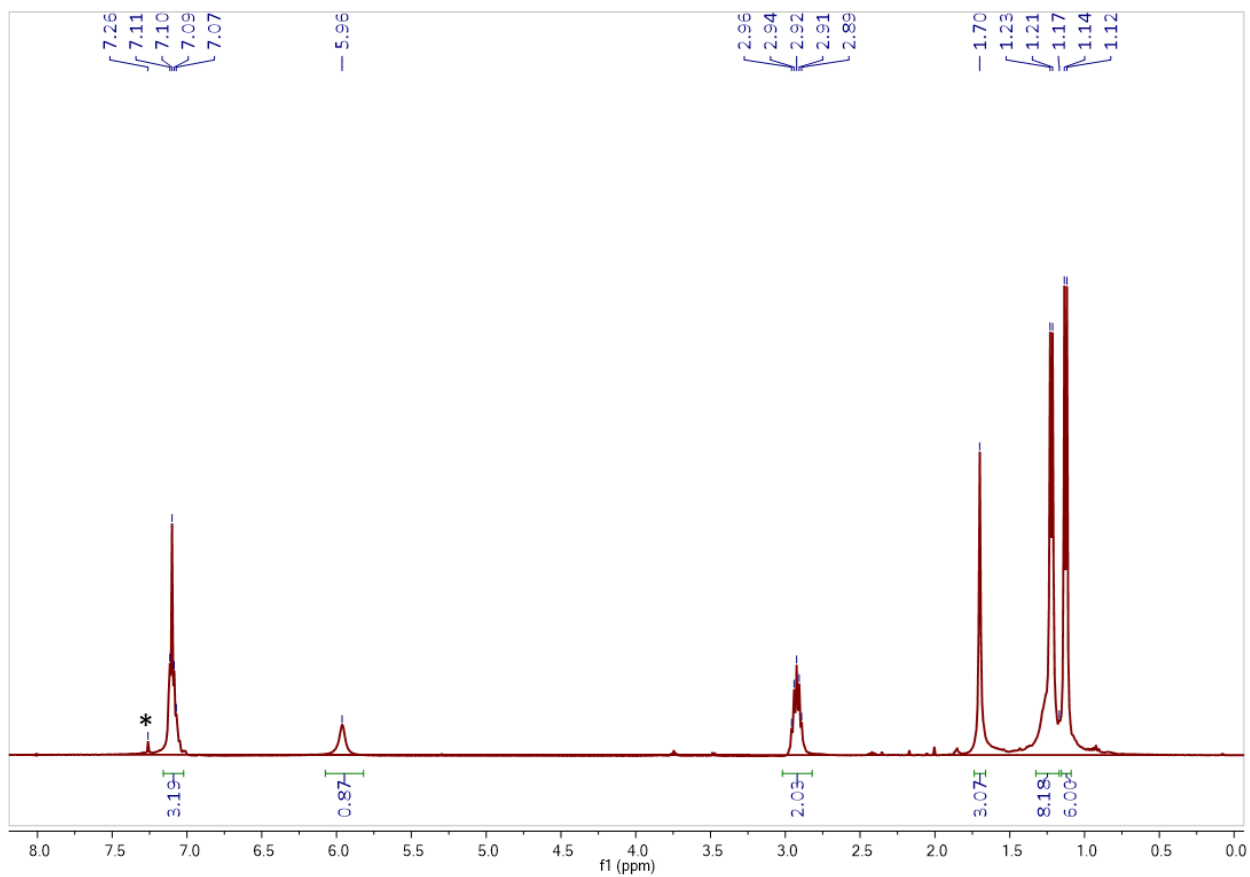

**Figure S37.**  $^1\text{H}$  NMR spectrum of  $\text{L}_1\text{Cu-CO}$  in  $\text{CDCl}_3$  (400 MHz, 298 K). Solvent residual peaks are marked with an asterisk (\*).

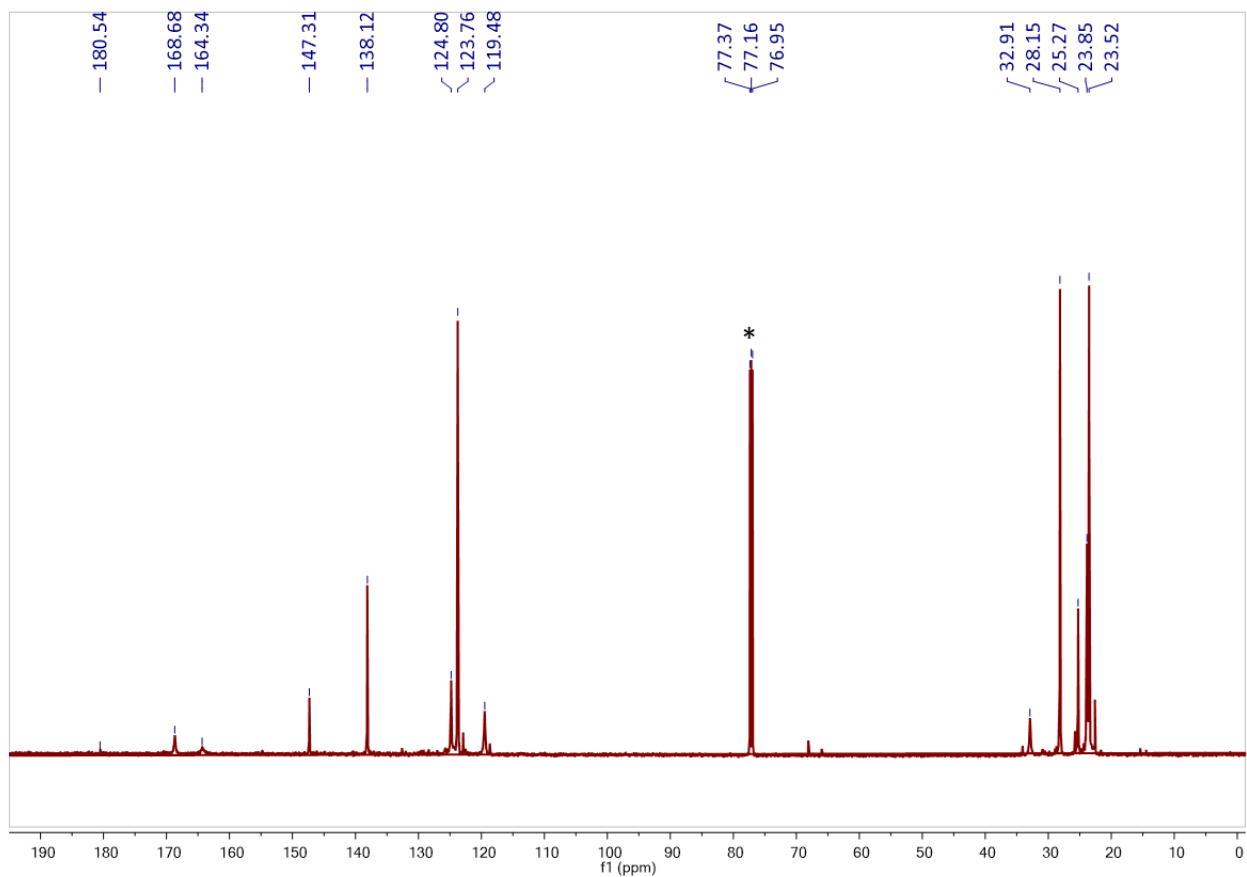

**Figure S38.**  $^{13}\text{C}$  NMR spectrum of  $\text{L}_1\text{Cu-CO}$  in  $\text{CDCl}_3$  (100 MHz, 298 K). Solvent residual peaks are marked with an asterisk (\*).

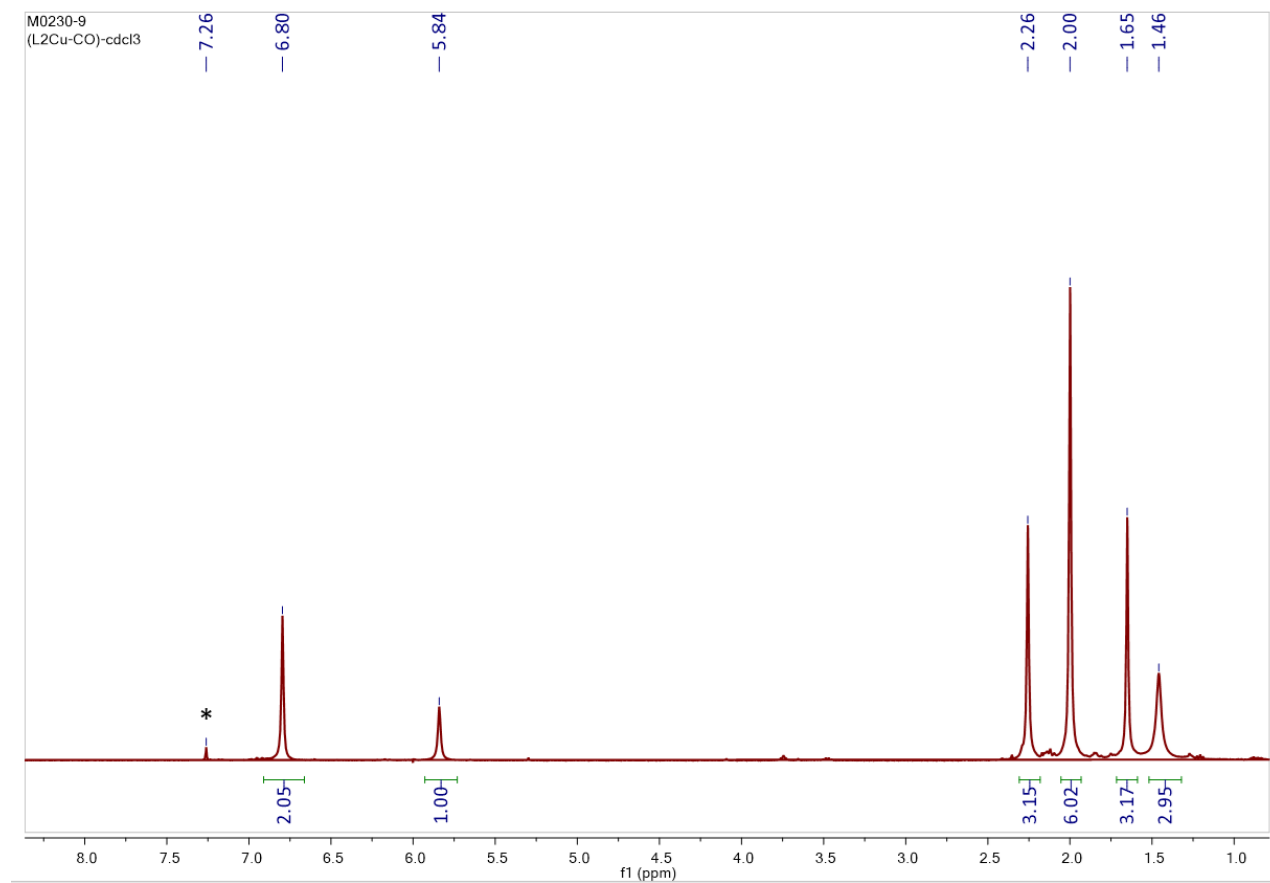

**Figure S39.**  $^1\text{H}$  NMR spectrum of  $\text{L}_2\text{Cu-CO}$  in  $\text{CDCl}_3$  (400 MHz, 298 K). Solvent residual peaks are marked with an asterisk (\*).

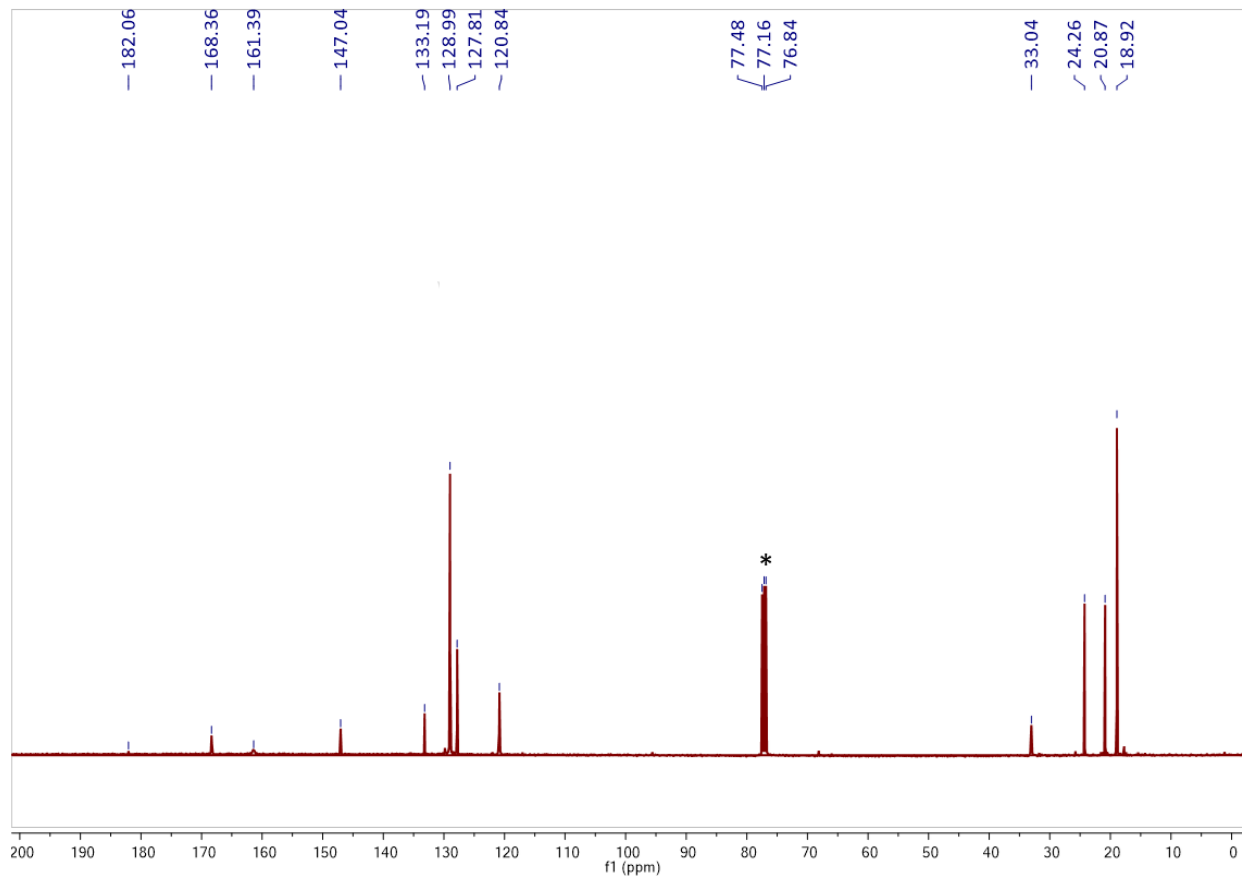

**Figure S40.**  $^{13}\text{C}$  NMR spectrum of  $\text{L}_2\text{Cu-CO}$  in  $\text{CDCl}_3$  (400 MHz, 298 K). Solvent residual peaks are marked with an asterisk (\*).

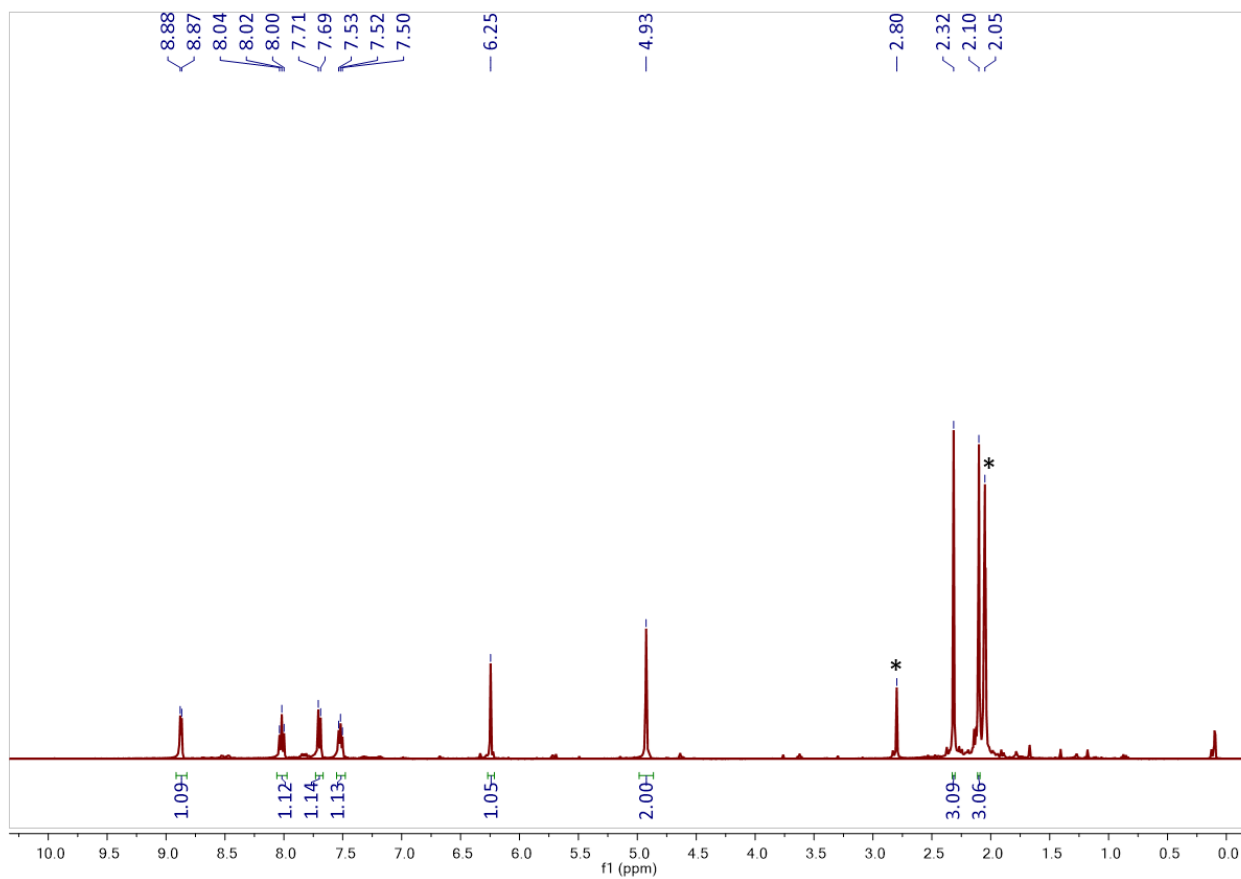

**Figure S41.**  $^1\text{H}$  NMR spectrum of  $\text{L}_3\text{Cu-CO}$  in  $\text{Acetone-D}_6$  (400 MHz, 298 K). Solvent residual peaks are marked with an asterisk (\*).



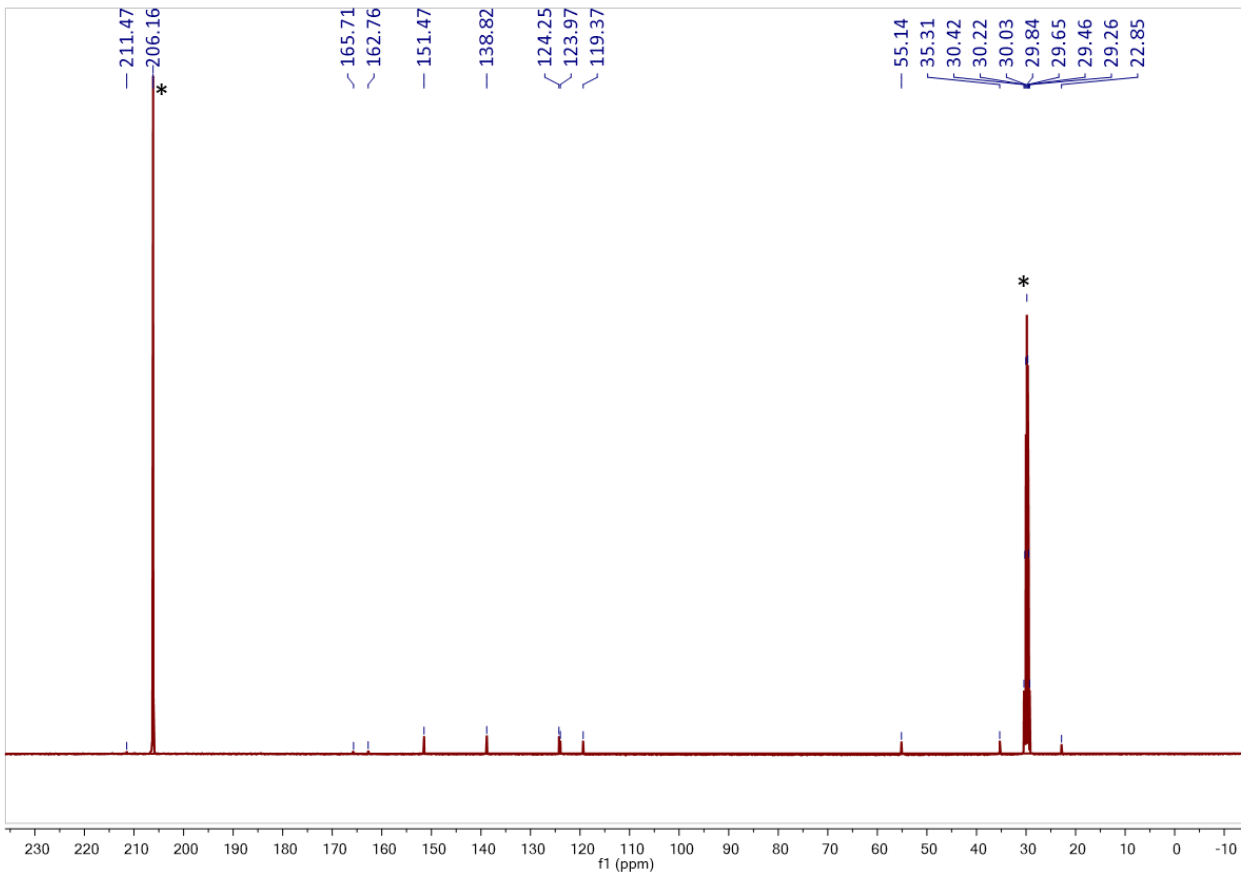

**Figure S42.**  $^{13}\text{C}$  NMR spectrum of  $\text{L}_3\text{Cu-CO}$  in Acetone- $\text{D}_6$  (100 MHz, 298 K). Solvent residual peaks are marked with an asterisk (\*).

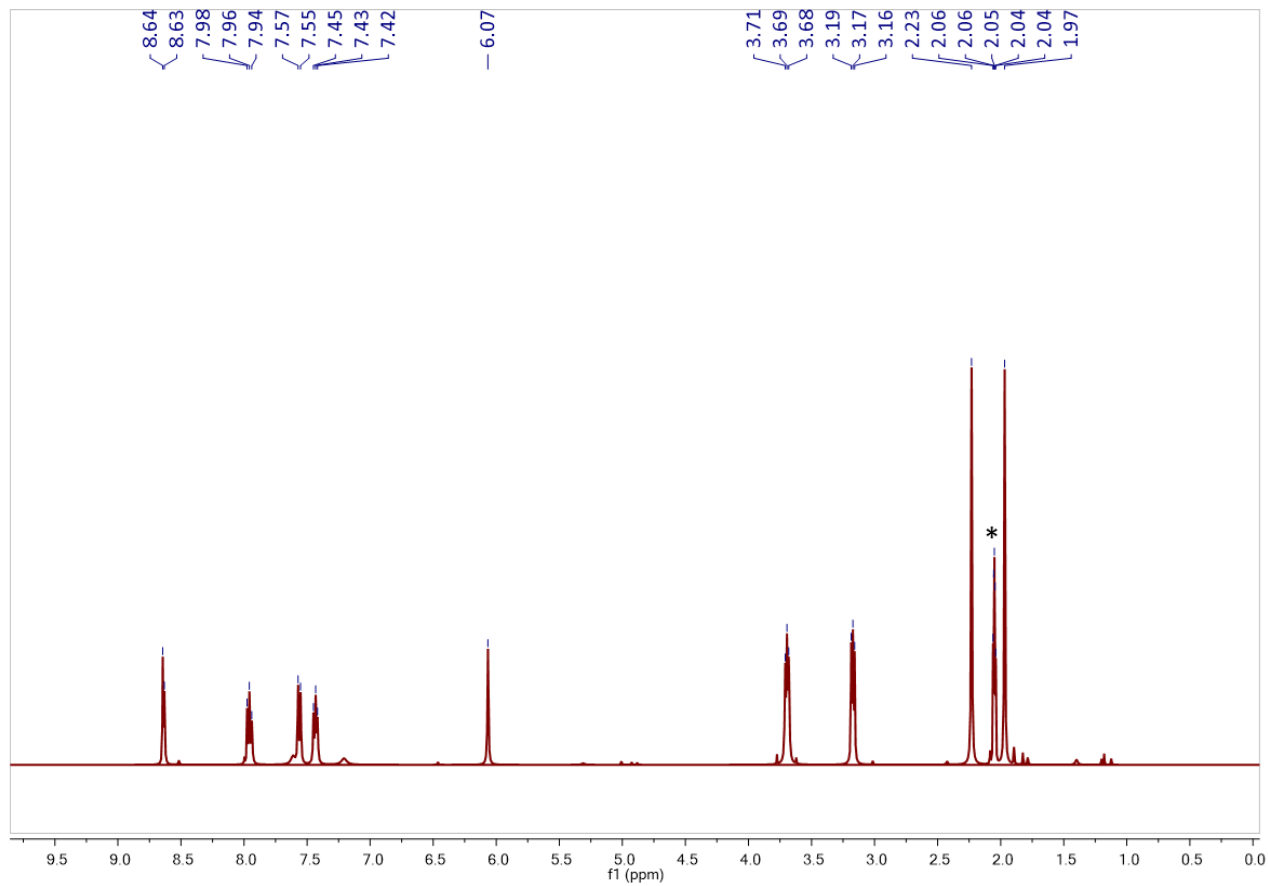

**Figure S43.**  $^1\text{H}$  NMR spectrum of  $\text{L}_4\text{Cu-CO}$  in  $\text{Acetone-D}_6$  (400 MHz, 298 K). Solvent residual peaks are marked with an asterisk (\*).

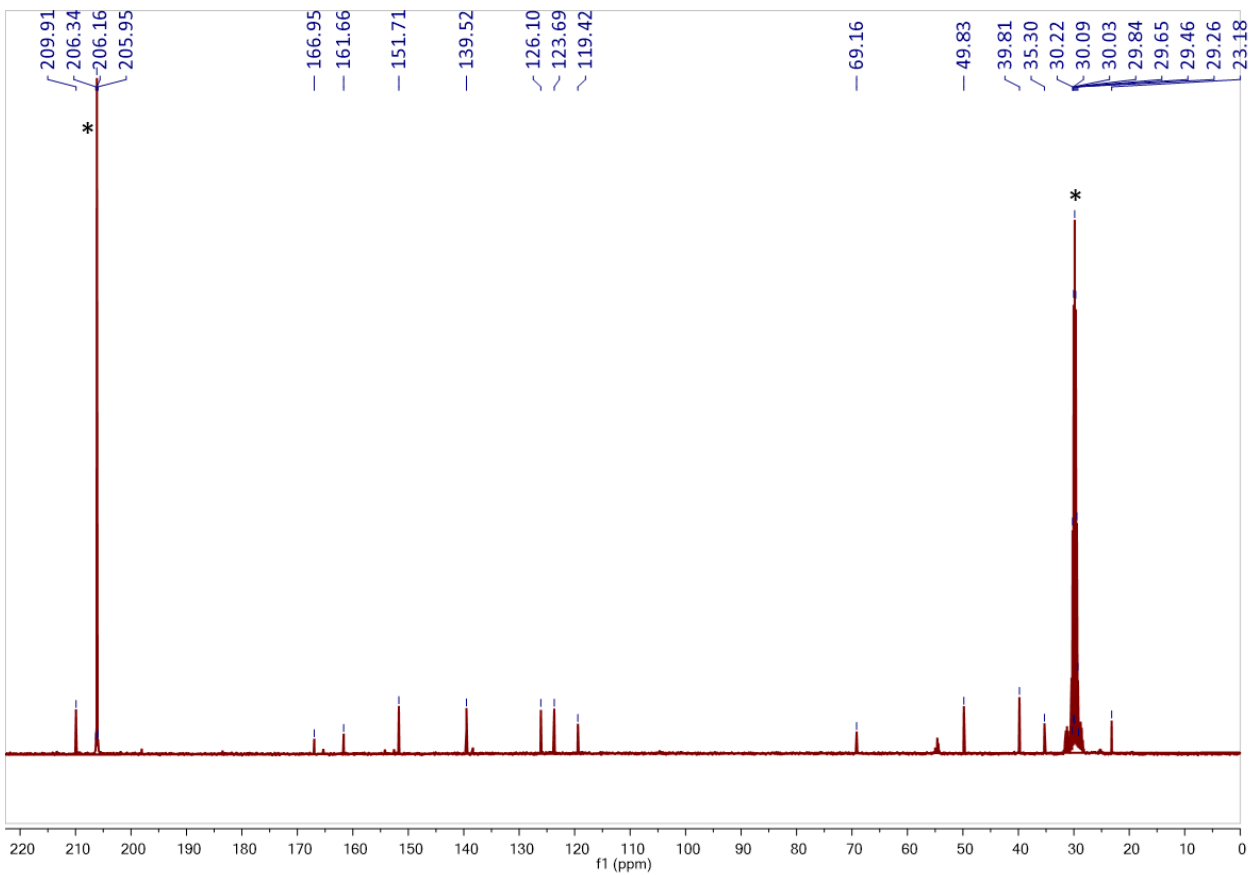

**Figure S44.**  $^{13}\text{C}$  NMR spectrum of  $\text{L}_4\text{Cu-CO}$  in Acetone- $\text{D}_6$  (100 MHz, 298 K). Solvent residual peaks are marked with an asterisk (\*).

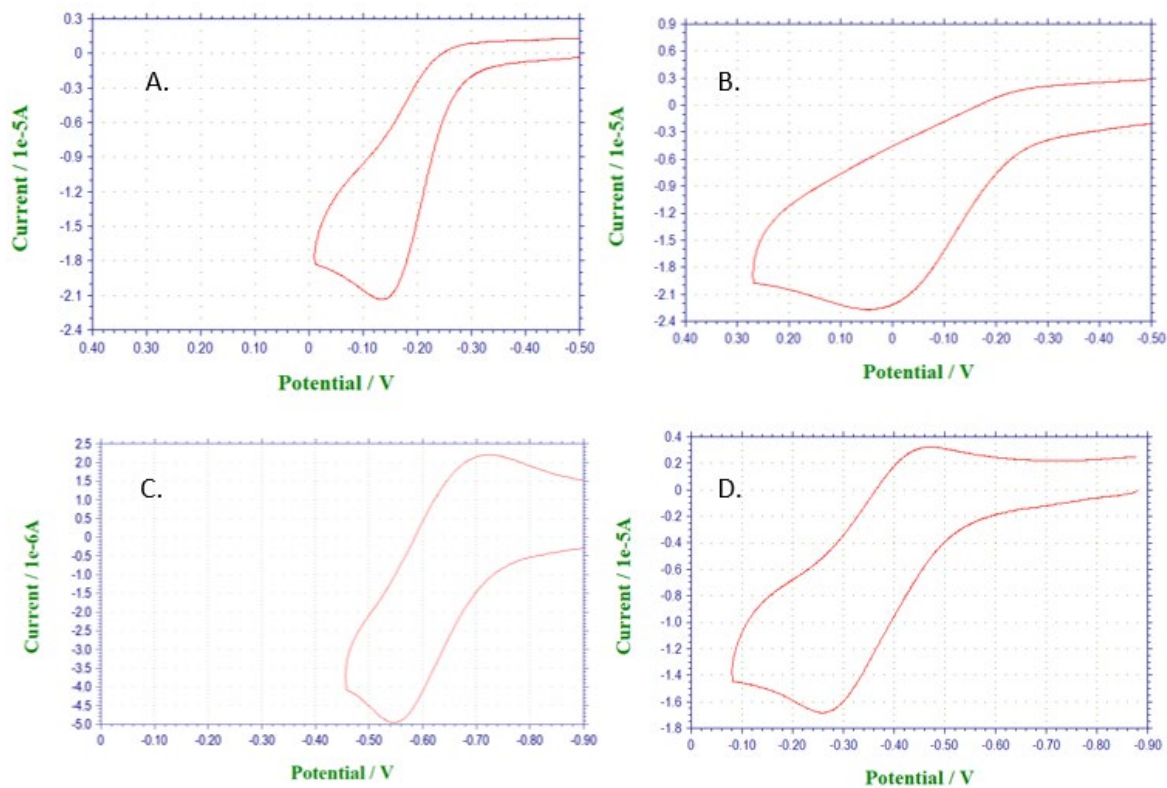

**Figure S45.** Cyclic voltammety diagrams of (A) [L<sub>1</sub>Cu]<sub>3</sub>, (B) [L<sub>2</sub>Cu]<sub>3</sub>, (C) L<sub>3</sub>Cu, and (D) L<sub>4</sub>Cu in 10<sup>-4</sup> M MeCN solutions using 0.1 M (Bu<sub>4</sub>N)(PF<sub>6</sub>) as supporting electrolyte, referenced to Fc<sup>+0</sup>.

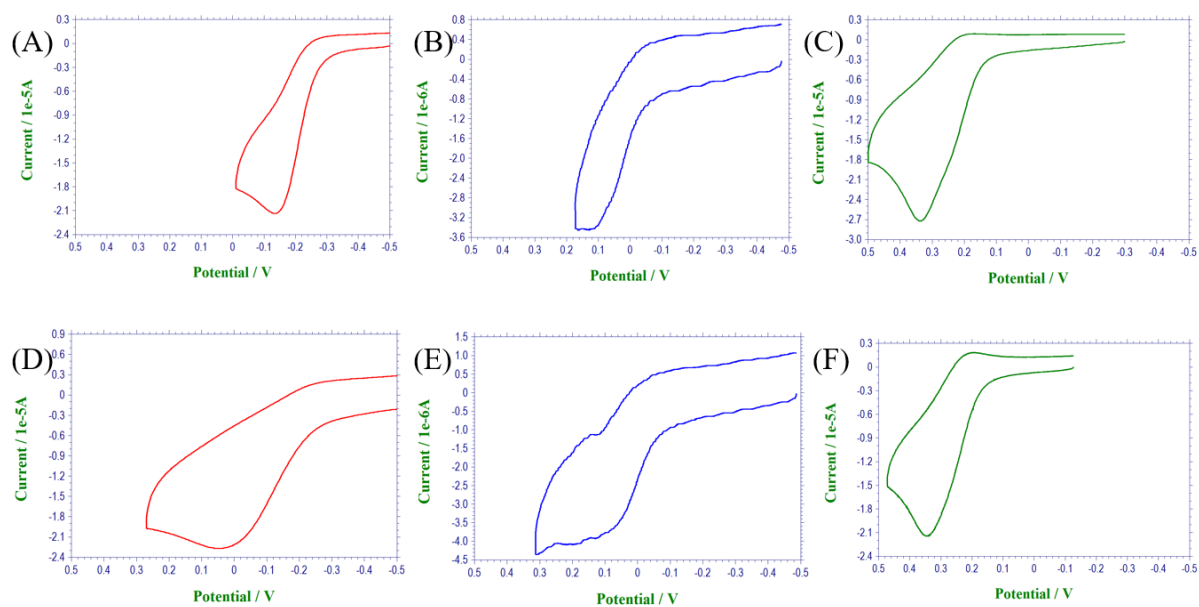

**Figure S46.** Cyclic voltammety diagrams correspond to two SN chelator copper complexes with  $10^{-4}$  M solutions of  $[L_1Cu]_3$  in (A)  $CH_3CN$ , (B)  $CH_2Cl_2$ , (C)  $CH_3NO_2$  respectively and  $[L_2Cu]_3$  in (D)  $CH_3CN$ , (E)  $CH_2Cl_2$ , (F)  $CH_3NO_2$  respectively using 0.1 M  $(Bu_4N)(PF_6)$  as supporting electrolyte, referenced to  $Fc^{+/0}$ .

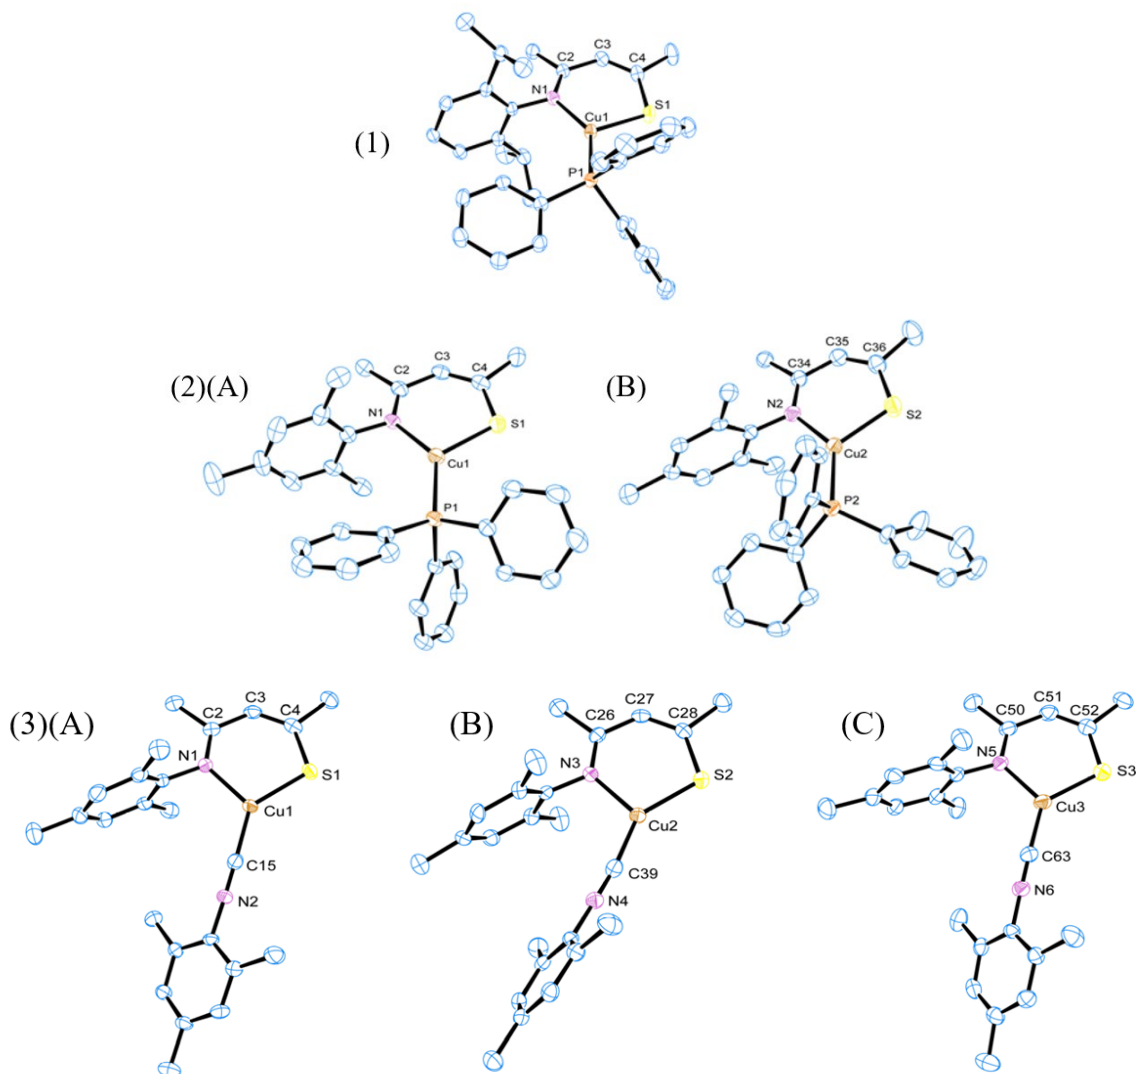

**Figure S47.** (1) ORTEP X-ray structure of  $L_1Cu(PPh_3)$  (2) ORTEP X-ray structures of two independent molecules of  $L_2CuPPh_3$  (a) and (b) similar to each other present in same unit cell (3) ORTEP X-ray structures of three independent molecules of  $L_2Cu(2,4,6-CNC_6H_2Me_3)$  a, b, and c similar to each other present in same unit cell at the 50% probability level. Hydrogen atoms are not shown for clarity.

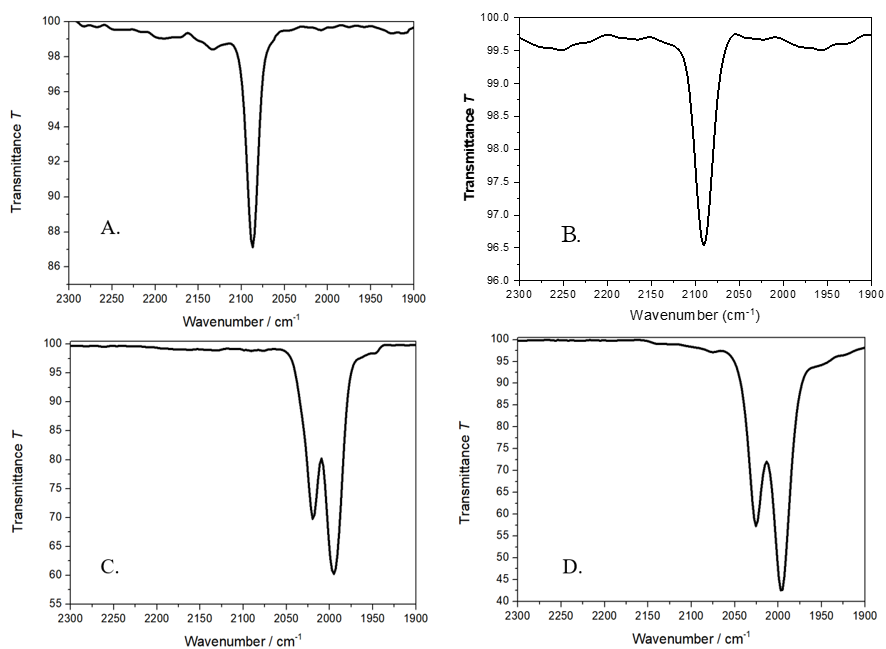

**Figure S48.** Solution state FTIR (THF) of copper(I) carbonyl adducts. (A)  $L_1CuCO$ , (B)  $L_2CuCO$ , (C)  $L_3CuCO$ , (D)  $L_4CuCO$ .

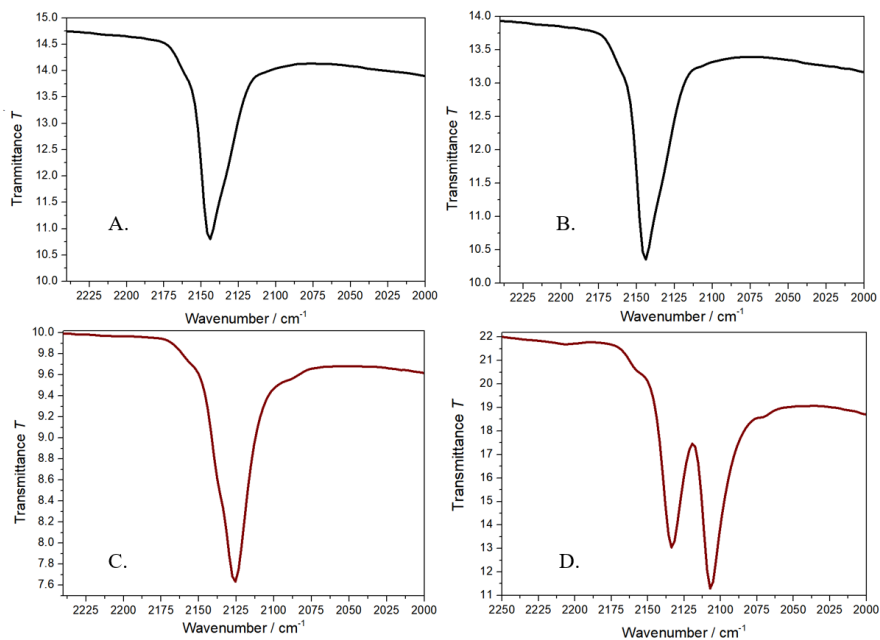

**Figure S49.** Solid state FTIR (KBr) of copper(I) isocyanide adducts. (A)  $L_1CuCNR$ , (B)  $L_2CuCNR$ , (C)  $L_3CuCNR$ , (D)  $L_4CuCNR$ .

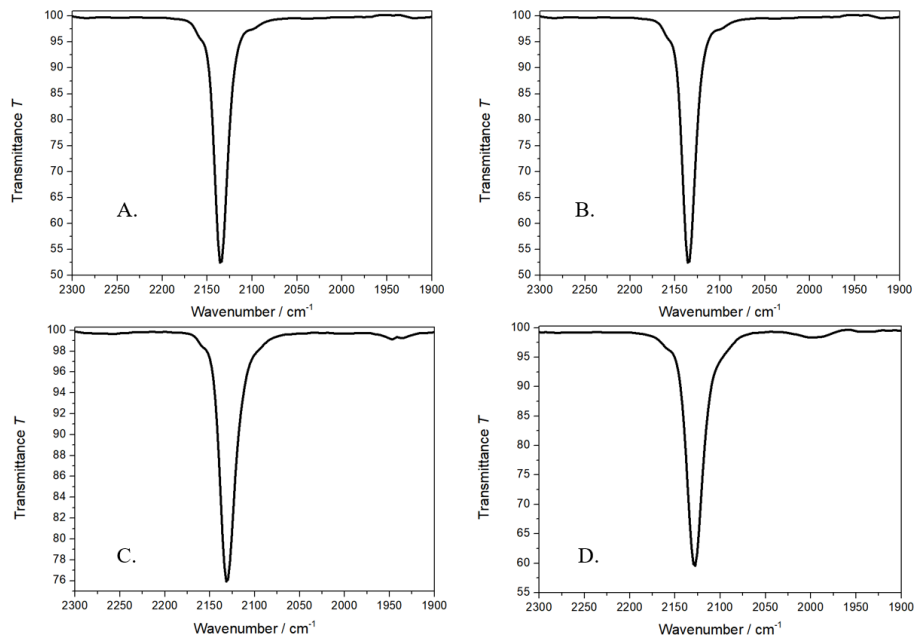

**Figure S50.** Solution state FTIR (THF) of copper(I) isocyanide adducts. (A)  $L_1CuCNR$ , (B)  $L_2CuCNR$ , (C)  $L_3CuCNR$ , D.  $L_4CuCNR$

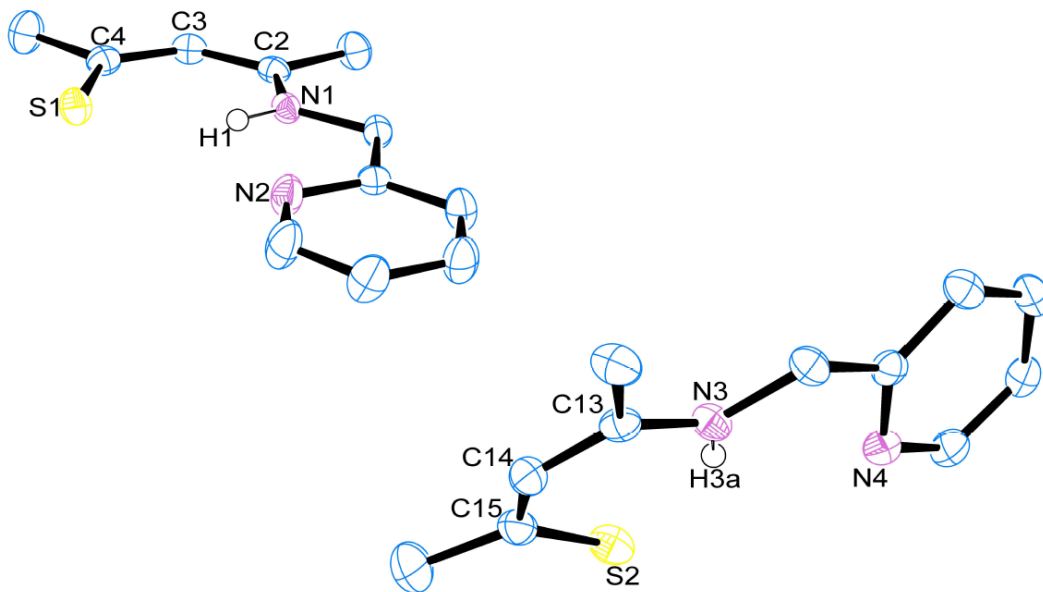

**Figure S51.** ORTEP X-ray structure of  $HL_3$  at the 50% probability level. Hydrogen atoms are not shown for clarity except  $H_1$  and  $H_{3a}$  group.



**(A)**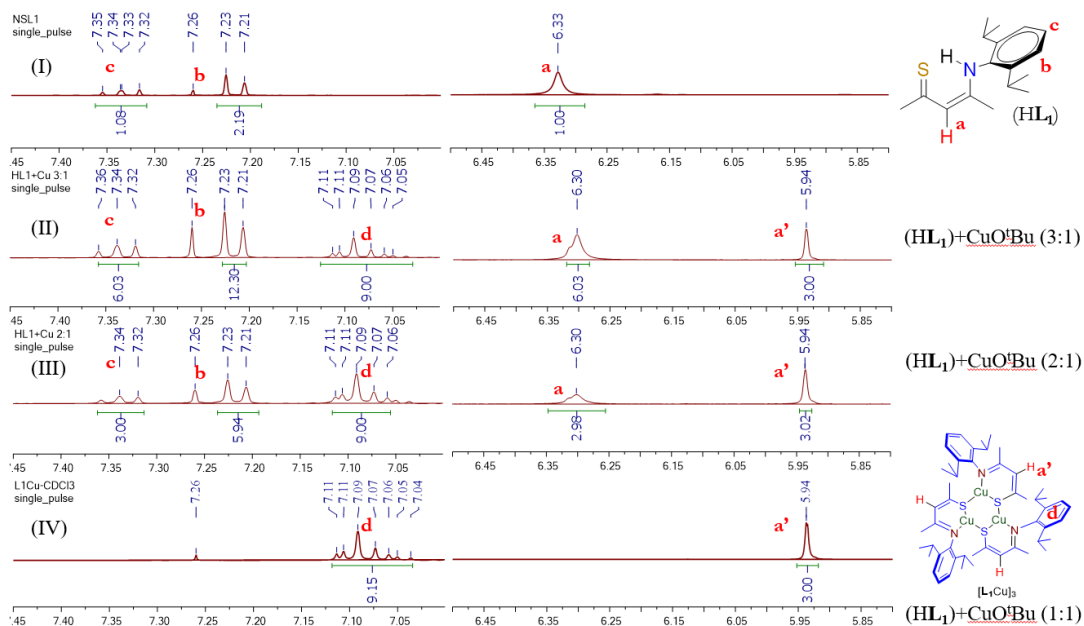**(B)**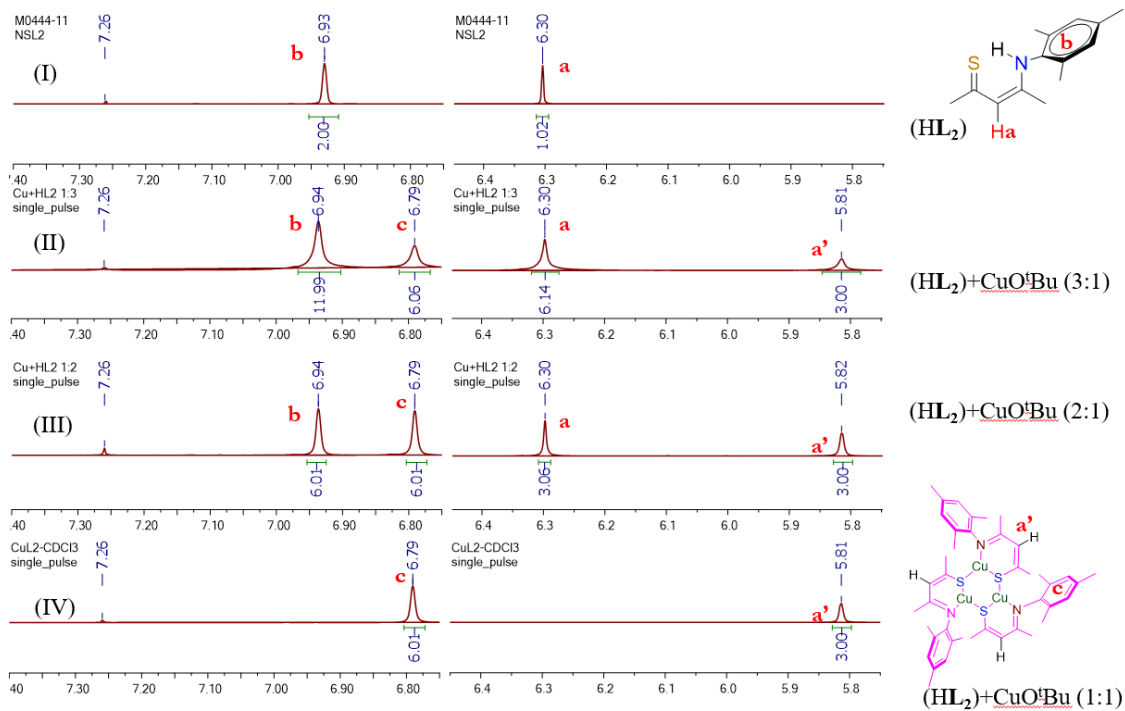

(C)

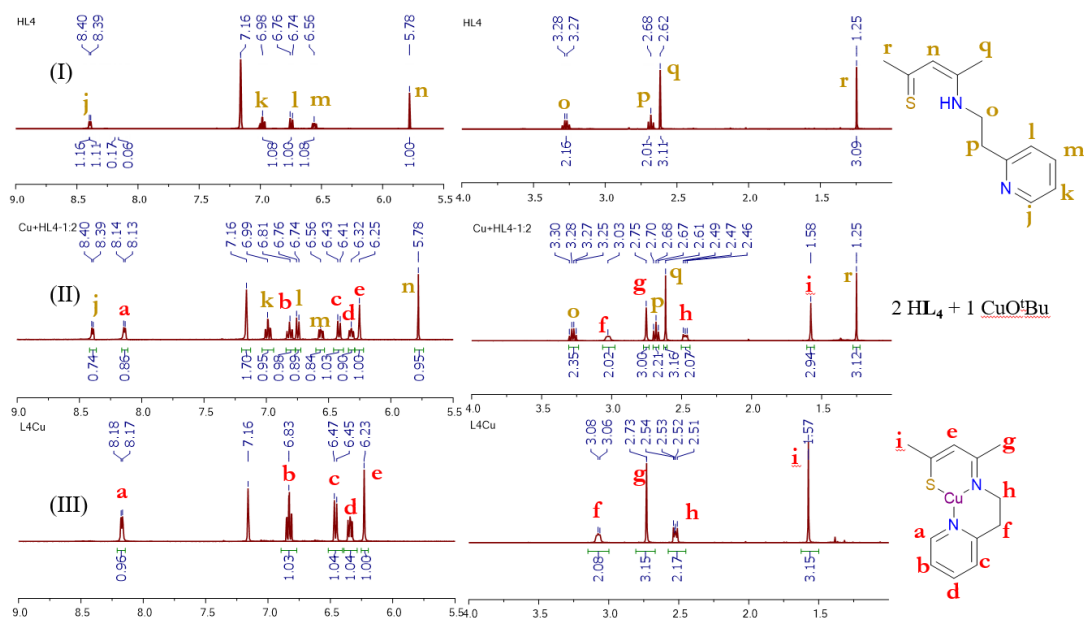

**Figure S52.** Stoichiometry-dependent NMR titration was performed at different concentrations in  $\text{CDCl}_3$ . The  $^1\text{H}$  NMR spectra were recorded for the following samples: (A) Expanded regions 7.00 to 7.45 ppm and 5.80 to 6.50 ppm for I, only  $\text{HL}_1$ ; II,  $\text{CuO}^t\text{Bu} + \text{HL}_1$  in 1:3 equivalents; III,  $\text{CuO}^t\text{Bu} + \text{HL}_1$  in 1:2 equivalents; IV, only  $[\text{L}_1\text{Cu}]_3$ . (B) Expanded regions 6.75 to 7.40 ppm and 5.80 to 6.50 ppm for I, only  $\text{HL}_2$ ; II,  $\text{CuO}^t\text{Bu} + \text{HL}_2$  in 1:3 equivalents; III,  $\text{CuO}^t\text{Bu} + \text{HL}_2$  in 1:2 equivalents; IV, only  $[\text{L}_2\text{Cu}]_3$ . (C) Expanded regions 9.00 to 5.00 ppm and 4.00 to 1.00 ppm for I, only  $\text{HL}_4$ ; II,  $\text{CuO}^t\text{Bu} + \text{HL}_4$  in 1:2 equivalents; III, only  $\text{L}_4\text{Cu}$ .

(A)

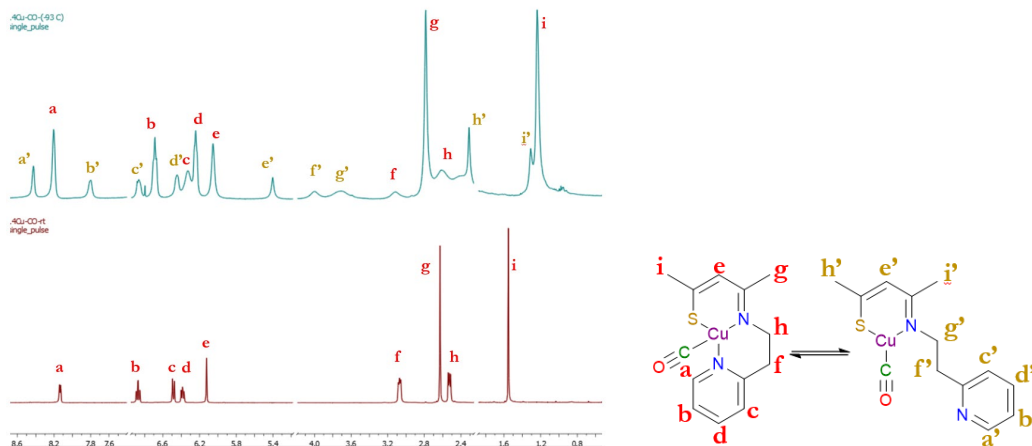

(B)

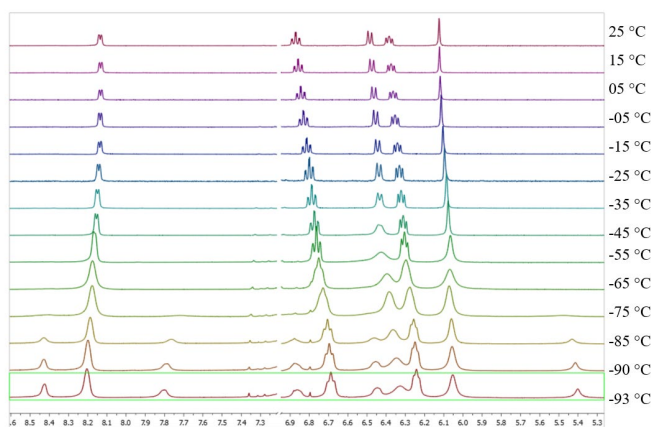

(C)

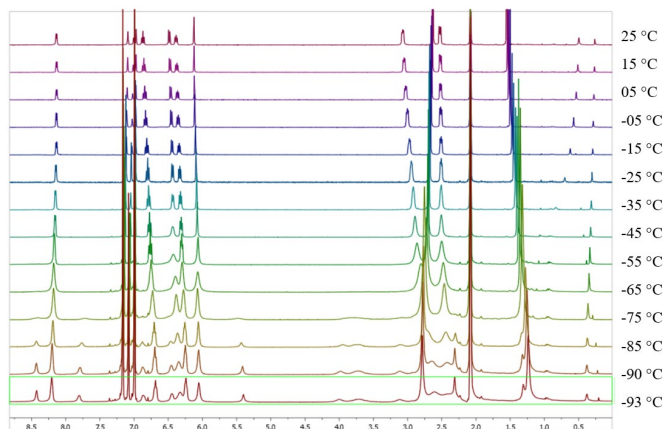

**Figure S53.** (A) The variable temperature  $^1\text{H}$  NMR spectra of  $\text{L}_4\text{CuCO}$  in  $\text{toluene-d}_8$  were obtained at  $-93\text{ }^\circ\text{C}$  and  $25\text{ }^\circ\text{C}$ , with an expanded region of 0.5 to 4.2 ppm and 5.2 to 8.6 ppm. (B) The expanded region of 5.2 to 8.6 ppm was studied using variable temperature  $^1\text{H}$  NMR

spectroscopy for  $\mathbf{L}_4\text{CuCO}$ . (C) The full  $^1\text{H}$  NMR spectrum of  $\mathbf{L}_4\text{CuCO}$ , along with the toluene- $d_8$  peaks, was recorded.

Note: Toluene- $d_8$  peaks were avoided for clarity for both A and B at 2.0 to 2.2 ppm and 7.0 to 7.2 ppm.

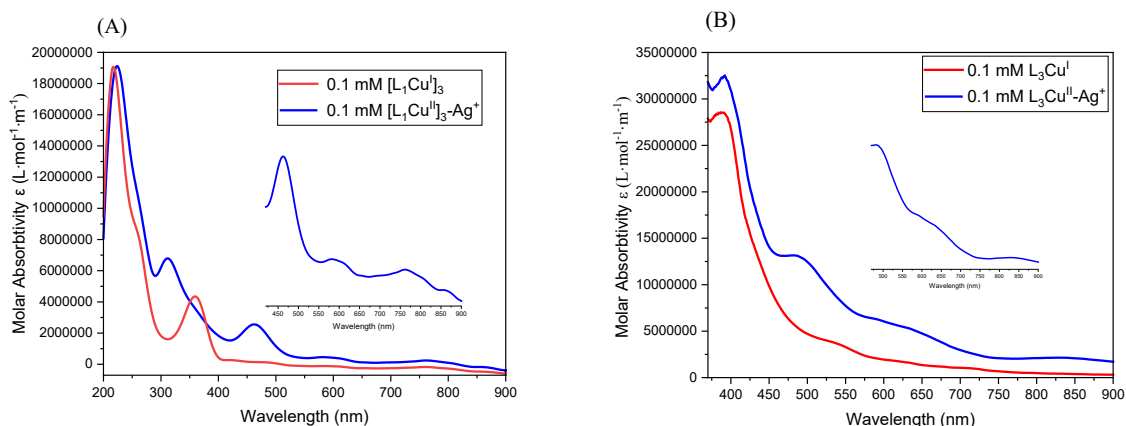

**Figure S54.** UV absorbance change for 0.1 mM (A) [ $\mathbf{L}_1\text{Cu}$ ]<sub>3</sub> and (B)  $\mathbf{L}_3\text{Cu}$  complexes before and after treatment with Ag<sup>+</sup> in acetonitrile at room temperature. The insets show the increases in the d-d transition band intensities.

**Note:** We performed stoichiometry-dependent UV titration experiments in acetonitrile to observe the mixed [ $\mathbf{L}_1\text{Cu}$ ]<sub>3</sub> and its copper (II) products as shown in the scheme below. Unreacted [ $\mathbf{L}_1\text{Cu}$ ]<sub>3</sub> complexes could be extracted by ether to the expected yield.

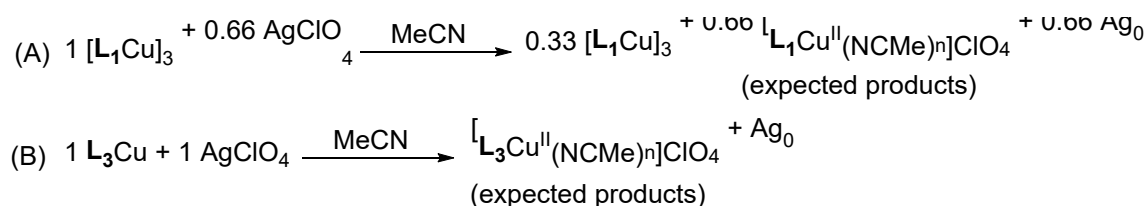

**Scheme S1.** Stoichiometry-dependent oxidation control experiments. (A) Stoichiometry dependent titration of [ $\mathbf{L}_1\text{Cu}$ ]<sub>3</sub> with AgClO<sub>4</sub> in MeCN at room temperature. (B) Treatment of  $\mathbf{L}_3\text{Cu}$  by AgClO<sub>4</sub> in MeCN at room temperature.

**Table S1.** Selected bond distances (Å) and bond angles (deg) for **L**<sub>1</sub>Cu(2,4,6-CNC<sub>6</sub>H<sub>2</sub>Me<sub>3</sub>), **L**<sub>2</sub>Cu(2,4,6-CNC<sub>6</sub>H<sub>2</sub>Me<sub>3</sub>), and **L**<sub>4</sub>Cu(2,4,6-CNC<sub>6</sub>H<sub>2</sub>Me<sub>3</sub>).

|                                 | <b>L</b> <sub>1</sub> Cu(2,4,6-CNC <sub>6</sub> H <sub>2</sub> Me <sub>3</sub> ) | <b>L</b> <sub>2</sub> Cu(2,4,6-CNC <sub>6</sub> H <sub>2</sub> Me <sub>3</sub> ) <sup>b</sup> | <b>L</b> <sub>4</sub> Cu(2,4,6-CNC <sub>6</sub> H <sub>2</sub> Me <sub>3</sub> ) |            |
|---------------------------------|----------------------------------------------------------------------------------|-----------------------------------------------------------------------------------------------|----------------------------------------------------------------------------------|------------|
|                                 |                                                                                  |                                                                                               | Molecule A                                                                       | Molecule B |
| Cu–N(amide(aryl))               | 1.973(16)                                                                        | 1.970(4)                                                                                      |                                                                                  |            |
| Cu–N(amide(alkyl))              |                                                                                  |                                                                                               | 2.046(19)                                                                        | 1.952(2)   |
| Cu–N(Py)                        |                                                                                  |                                                                                               | 2.110(2)                                                                         |            |
| Cu–S                            | 2.174(5)                                                                         | 2.175(13)                                                                                     | 2.268(7)                                                                         | 2.172(7)   |
| C–C(NCCCS backbone)             | 1.436(3)                                                                         | 1.433(7)                                                                                      | 1.443(3)                                                                         | 1.438(4)   |
|                                 | 1.364(3)                                                                         | 1.358(7)                                                                                      | 1.359(4)                                                                         | 1.362(4)   |
| C–N                             | 1.302(7)                                                                         | 1.308(6)                                                                                      | 1.303(3)                                                                         | 1.477(3)   |
| C–S                             | 1.719(2)                                                                         | 1.730(5)                                                                                      | 1.725(3)                                                                         | 1.721(3)   |
| Cu–C(isocyanide)                | 1.848(2)                                                                         | 1.844(5)                                                                                      | 1.867(3)                                                                         | 1.834(3)   |
| C≡N(isocyanide)                 | 1.154(3)                                                                         | 1.157(6)                                                                                      | 1.164(3)                                                                         | 1.161(3)   |
| N(amide(alkyl))–Cu–N(Py)        |                                                                                  |                                                                                               | 90.20(8)                                                                         |            |
| N(amide(aryl))–Cu–S             | 103.49(5)                                                                        | 102.79(12)                                                                                    |                                                                                  |            |
| N(amide(alkyl))–Cu–S            |                                                                                  |                                                                                               | 99.19(5)                                                                         | 104.48(6)  |
| C(isocyanide)–Cu–S              | 136.33(6)                                                                        | 136.35(15)                                                                                    | 118.29(7)                                                                        | 130.81(8)  |
| C(isocyanide)–Cu–N(amide(aryl)) | 120.19(8)                                                                        | 120.44(19)                                                                                    | 109.58(9)                                                                        | 124.60(10) |
| ∠NCCCS(aryl) <sup>a</sup>       | 86.50                                                                            | 88.79                                                                                         |                                                                                  |            |

<sup>a</sup> Dihedral angle between NCCCS plane and the *N*-aryl ring. <sup>b</sup> There are three independent molecules of **L**<sub>2</sub>Cu(2,4,6-CNC<sub>6</sub>H<sub>2</sub>Me<sub>3</sub>) in the unit cell, only one molecule data shown here. For complete information refer supporting information Figure S47 and Table S3.

**Table S2.** Selected Bond distances (Å) and Bond Angles (deg) for **L<sub>1</sub>Cu(PPh<sub>3</sub>)**, **L<sub>2</sub>Cu(PPh<sub>3</sub>)**, and **L<sub>4</sub>Cu(PPh<sub>3</sub>)**.

|                           | <b>L<sub>1</sub>Cu(PPh<sub>3</sub>)</b> | <b>L<sub>2</sub>Cu(PPh<sub>3</sub>)<sup>b</sup></b> | <b>L<sub>4</sub>Cu(PPh<sub>3</sub>)</b> |
|---------------------------|-----------------------------------------|-----------------------------------------------------|-----------------------------------------|
| Cu–N(amide(aryl))         | 1.956(3)                                | 1.941(5)                                            |                                         |
| Cu–N(amide(alkyl))        |                                         |                                                     | 2.049(17)                               |
| Cu–N(Py)                  |                                         |                                                     | 2.069(17)                               |
| Cu–S                      | 2.204(9)                                | 2.188(19)                                           | 2.256(6)                                |
| Cu–P                      | 2.195(10)                               | 2.182(19)                                           | 2.210(6)                                |
| C–C(NCCCS backbone)       | 1.431(5)                                | 1.441(9)                                            | 1.448(3)                                |
|                           | 1.363(5)                                | 1.351(9)                                            | 1.365(3)                                |
| C–N                       | 1.315(5)                                | 1.312(8)                                            | 1.296(3)                                |
| C–S                       | 1.721(4)                                | 1.726(7)                                            | 1.720(2)                                |
| P–Cu–S                    | 116.88(4)                               | 122.41(7)                                           | 114.15(2)                               |
| N(amide(aryl))–Cu–P       | 139.42(9)                               | 133.96(15)                                          |                                         |
| N(amide(alkyl))–Cu–P      |                                         |                                                     | 115.54(5)                               |
| N(amide(aryl))–Cu–S       | 103.68(9)                               | 103.53(15)                                          |                                         |
| N(amide(alkyl))–Cu–S      |                                         |                                                     | 100.28(5)                               |
| N(amide(alkyl))–Cu–N(Py)  |                                         |                                                     | 90.93(7)                                |
| ∠NCCCS(aryl) <sup>a</sup> | 82.93                                   | 83.49                                               |                                         |

<sup>a</sup> Dihedral angle between NCCCS plane and the *N*-aryl ring. <sup>b</sup> There are two independent molecules of **L<sub>2</sub>Cu(PPh<sub>3</sub>)** in the unit cell, only one molecule data shown here. For complete information see figures S46, S48 and Table S3.

**Table S3.** Selected bond lengths (Å) and bond angles (°) for copper(I) adducts, L<sub>2</sub>Cu(2,4,6-CNC<sub>6</sub>H<sub>2</sub>Me<sub>3</sub>) and L<sub>2</sub>CuPPh<sub>3</sub>.

|                                 | L <sub>2</sub> Cu(2,4,6-CNC <sub>6</sub> H <sub>2</sub> Me <sub>3</sub> ) <sup>b</sup> | L <sub>2</sub> Cu(2,4,6-CNC <sub>6</sub> H <sub>2</sub> Me <sub>3</sub> ) <sup>b</sup> | L <sub>2</sub> Cu(2,4,6-CNC <sub>6</sub> H <sub>2</sub> Me <sub>3</sub> ) <sup>b</sup> | L <sub>2</sub> CuPPh <sub>3</sub> <sup>c</sup> | L <sub>2</sub> CuPPh <sub>3</sub> <sup>c</sup> |
|---------------------------------|----------------------------------------------------------------------------------------|----------------------------------------------------------------------------------------|----------------------------------------------------------------------------------------|------------------------------------------------|------------------------------------------------|
| Cu–N(amide(aryl))               | 1.970(4)                                                                               | 1.977(4)                                                                               | 1.950(4)                                                                               | 1.941(5)                                       | 1.937(5)                                       |
| Cu–S                            | 2.175(13)                                                                              | 2.161(13)                                                                              | 2.175(15)                                                                              | 2.188(19)                                      | 2.187(2)                                       |
| Cu–P                            |                                                                                        |                                                                                        |                                                                                        | 2.182(19)                                      | 2.183(19)                                      |
| C–C(NCCCS backbone)             | 1.433(7)                                                                               | 1.440(7)                                                                               | 1.441(7)                                                                               | 1.441(9)                                       | 1.433(9)                                       |
|                                 | 1.358(7)                                                                               | 1.361(6)                                                                               | 1.360(7)                                                                               | 1.351(9)                                       | 1.353(9)                                       |
| C–N                             | 1.308(6)                                                                               | 1.297(6)                                                                               | 1.307(6)                                                                               | 1.312(8)                                       | 1.305(8)                                       |
| C–S                             | 1.730(5)                                                                               | 1.729(5)                                                                               | 1.706(5)                                                                               | 1.726(7)                                       | 1.723(7)                                       |
| Cu–C(isocyanide)                | 1.844(5)                                                                               | 1.837(5)                                                                               | 1.835(5)                                                                               |                                                |                                                |
| C≡N(isocyanide)                 | 1.157(6)                                                                               | 1.161(6)                                                                               | 1.155(6)                                                                               |                                                |                                                |
| P–Cu–S                          |                                                                                        |                                                                                        |                                                                                        | 122.41(7)                                      | 122.08(8)                                      |
| N(amide(aryl))–Cu–P             |                                                                                        |                                                                                        |                                                                                        | 133.96(15)                                     | 134.67(17)                                     |
| N(amide(aryl))–Cu–S             | 102.79(11)                                                                             | 103.87(11)                                                                             | 104.89(12)                                                                             | 103.53(15)                                     | 103.07(17)                                     |
| C(isocyanide)–Cu–S              | 136.35(15)                                                                             | 142.51(16)                                                                             | 132.79(17)                                                                             |                                                |                                                |
| C(isocyanide)–Cu–N(amide(aryl)) | 120.44(19)                                                                             | 113.53(19)                                                                             | 122.0(2)                                                                               |                                                |                                                |
| ∠NCCCS(aryl) <sup>a</sup>       | 88.79                                                                                  | 88.54                                                                                  | 89.92                                                                                  | 83.49                                          | 85.72                                          |

<sup>a</sup>Dihedral angle between N-aryl ring and NCCCS plane. <sup>b</sup>There are three independent crystal structures of L<sub>2</sub>Cu(2,4,6-CNC<sub>6</sub>H<sub>2</sub>Me<sub>3</sub>) see figure S47 similar to each other in same unit cell. <sup>c</sup>There are two independent crystal structures of L<sub>2</sub>Cu(PPh<sub>3</sub>) similar to each other in same unit cell.

**Table S4.** Crystallographic data for synthesized ligands HL<sub>1</sub>, HL<sub>2</sub>, HL<sub>3</sub>, HL<sub>4</sub> and copper(I) complexes [L<sub>1</sub>Cu]<sub>3</sub>, L<sub>3</sub>Cu

|                                                   | HL <sub>1</sub> <sup>a</sup>        | HL <sub>2</sub>                     | HL <sub>3</sub>                                               | HL <sub>4</sub>                                  | [L <sub>1</sub> Cu] <sub>3</sub>                                              | L <sub>3</sub> Cu                                   |
|---------------------------------------------------|-------------------------------------|-------------------------------------|---------------------------------------------------------------|--------------------------------------------------|-------------------------------------------------------------------------------|-----------------------------------------------------|
| CCDC Number                                       | 2177690                             | 2177691                             | 2177692                                                       | 2177693                                          | 2177697                                                                       | 2177698                                             |
| Empirical formula                                 | C <sub>17</sub> H <sub>24</sub> N S | C <sub>14</sub> H <sub>19</sub> N S | C <sub>22</sub> H <sub>28</sub> N <sub>4</sub> S <sub>2</sub> | C <sub>12</sub> H <sub>16</sub> N <sub>2</sub> S | C <sub>50</sub> H <sub>70</sub> Cu <sub>3</sub> N <sub>3</sub> S <sub>3</sub> | C <sub>11</sub> H <sub>13</sub> Cu N <sub>2</sub> S |
| Formula weight                                    | 274.43                              | 233.36                              | 412.60                                                        | 220.33                                           | 999.89                                                                        | 268.83                                              |
| T° K                                              | 113(2)                              | 113(2)                              | 113(2)                                                        | 113(2)                                           | 113(2)                                                                        | 113(2)                                              |
| Crystal size mm <sup>3</sup>                      | 0.3 x 0.25 x 0.2                    | 0.25 x 0.2 x 0.2                    | 0.25 x 0.2 x 0.2                                              | 0.25 x 0.2 x 0.2                                 | 0.2 x 0.15 x 0.1                                                              | 0.25 x 0.2 x 0.2                                    |
| Crystal system                                    | Monoclinic                          | Monoclinic                          | Triclinic                                                     | Triclinic                                        | Orthorhombic                                                                  | Triclinic                                           |
| Space group                                       | P2 <sub>1</sub> /c                  | P2 <sub>1</sub> /c                  | P-1                                                           | P-1                                              | P2 <sub>1</sub> 2 <sub>1</sub> 2 <sub>1</sub>                                 | P-1                                                 |
| a(Å)                                              | 11.8498(4)                          | 8.1962(3)                           | 6.8410(2)                                                     | 7.0013(5)                                        | 15.3411(3)                                                                    | 7.5980(3)                                           |
| b(Å)                                              | 8.9288(4)                           | 8.8474(2)                           | 9.3645(3)                                                     | 7.2355(5)                                        | 16.6809(3)                                                                    | 7.7676(3)                                           |
| c(Å)                                              | 15.6583(6)                          | 18.7562(5)                          | 18.5881(4)                                                    | 12.2312(9)                                       | 19.9753(4)                                                                    | 10.3763(4)                                          |
| α(deg)                                            | 90°                                 | 90°                                 | 93.715(2)°                                                    | 105.091(6)°                                      | 90°                                                                           | 102.817(3)°                                         |
| β(deg)                                            | 99.025(3)°                          | 100.089(3)°                         | 99.741(2)°                                                    | 93.555(6)°                                       | 90°                                                                           | 98.971(3)°                                          |
| γ(deg)                                            | 90°                                 | 90°                                 | 107.792(3)°                                                   | 92.253(6)°                                       | 90°                                                                           | 107.163(4)°                                         |
| V (Å <sup>3</sup> )                               | 1636.21(11)                         | 1339.08(7)                          | 1108.86(6)                                                    | 596.10(8)                                        | 5111.75(17)                                                                   | 554.20(4)                                           |
| Z                                                 | 4                                   | 4                                   | 2                                                             | 2                                                | 4                                                                             | 2                                                   |
| D <sub>calcd</sub> (g cm <sup>-3</sup> )          | 1.118                               | 1.158                               | 1.236                                                         | 1.228                                            | 1.299                                                                         | 1.611                                               |
| μ(mm <sup>-1</sup> )                              | 0.186                               | 0.216                               | 0.255                                                         | 0.241                                            | 1.394                                                                         | 2.124                                               |
| Reflns mcsd/indep                                 | 13693/2888                          | 19261/2818                          | 15514/4610                                                    | 6999/ 2447                                       | 33473/10353                                                                   | 6328/2274                                           |
| Data/restraints/params                            | 2888/102/182                        | 2818 / 0 / 150                      | 4610 / 0 / 257                                                | 2447 / 0 / 138                                   | 10353 / 306 / 561                                                             | 2274 / 0 / 138                                      |
| GOF                                               | 1.065                               | 1.072                               | 1.071                                                         | 1.073                                            | 1.034                                                                         | 1.144                                               |
| R <sub>int</sub>                                  | 0.0297                              | 0.0242                              | 0.0295                                                        | 0.0407                                           | 0.0729                                                                        | 0.0574                                              |
| R <sub>i</sub> [I>2σ] (all data)                  | 0.0367 (0.0914)                     | 0.0328(0.0834)                      | 0.0355 (0.0812)                                               | 0.0444 (0.1185)                                  | 0.0570 (0.1258)                                                               | 0.0355 (0.0841)                                     |
| R <sub>w</sub> [I>2σ] (all data)                  | 0.0446 (0.0952)                     | 0.0387(0.0860)                      | 0.0454 (0.0850)                                               | 0.0547 (0.1232)                                  | 0.0667 (0.1298)                                                               | 0.0417 (0.0863)                                     |
| Max. peak/hole (e <sup>-</sup> / Å <sup>3</sup> ) | 0.18/ -0.21                         | 0.23 / -0.21                        | 0.29 / -0.21                                                  | 0.423 / -0.320                                   | 0.820 / -0.642                                                                | 0.511 / -0.744                                      |

<sup>a</sup>The N-H hydrogen of HL<sub>1</sub> also could be confirmed by the NMR characterizations in comparison with HL<sub>2</sub> analogue.



**Table S5.** Crystallographic data for synthesized copper(I) phosphine and isocyanide adducts

|                                                   | L <sub>1</sub> Cu(2,4,6-CNC <sub>6</sub> H <sub>2</sub> Me <sub>3</sub> ) | L <sub>2</sub> Cu(2,4,6-CNC <sub>6</sub> H <sub>2</sub> Me <sub>3</sub> )     | L <sub>4</sub> Cu(2,4,6-CNC <sub>6</sub> H <sub>2</sub> Me <sub>3</sub> )     | L <sub>1</sub> Cu(PPh <sub>3</sub> )  | L <sub>2</sub> Cu(PPh <sub>3</sub> )                                                         | L <sub>4</sub> Cu(PPh <sub>3</sub> )                |
|---------------------------------------------------|---------------------------------------------------------------------------|-------------------------------------------------------------------------------|-------------------------------------------------------------------------------|---------------------------------------|----------------------------------------------------------------------------------------------|-----------------------------------------------------|
| CCDC Number                                       | 2260182                                                                   | 2177695                                                                       | 2177696                                                                       | 2177687                               | 2177688                                                                                      | 2177689                                             |
| Empirical formula                                 | C <sub>27</sub> H <sub>35</sub> CuN <sub>2</sub> S                        | C <sub>72</sub> H <sub>87</sub> Cu <sub>3</sub> N <sub>6</sub> S <sub>3</sub> | C <sub>44</sub> H <sub>52</sub> Cu <sub>2</sub> N <sub>6</sub> S <sub>2</sub> | C <sub>35</sub> H <sub>39</sub> CuNPS | C <sub>64</sub> H <sub>66</sub> Cu <sub>2</sub> N <sub>2</sub> P <sub>2</sub> S <sub>2</sub> | C <sub>30</sub> H <sub>30</sub> CuN <sub>2</sub> PS |
| Formula weight                                    | 483.17                                                                    | 441.09                                                                        | 856.1                                                                         | 600.24                                | 1116.32                                                                                      | 545.13                                              |
| T° K                                              | 113(2)                                                                    | 113(2)                                                                        | 113(2)                                                                        | 113(2)                                | 113(2)                                                                                       | 113(2)                                              |
| Crystal size mm <sup>3</sup>                      | 0.3 x 0.2 x 0.2                                                           | 0.2 × 0.15 × 0.1                                                              | 0.38 × 0.25 × 0.25                                                            | 0.25 × 0.15 × 0.1                     | 0.2 × 0.15 × 0.1                                                                             | 0.3 × 0.2 × 0.2                                     |
| Crystal system                                    | Tetragonal                                                                | Monoclinic                                                                    | Triclinic                                                                     | Monoclinic                            | Monoclinic                                                                                   | Monoclinic                                          |
| Space group                                       | P-42 <sub>1</sub> c                                                       | P2 <sub>1</sub> /c                                                            | P-1                                                                           | Pn                                    | P2 <sub>1</sub> /c                                                                           | P2 <sub>1</sub> /c                                  |
| a(Å)                                              | 10.195(3)                                                                 | 8.3921(2)                                                                     | 8.4434(3)                                                                     | 8.7209(2)                             | 34.0853(6)                                                                                   | 10.0287(2)                                          |
| b(Å)                                              | 11.398(3)                                                                 | 72.7477(11)                                                                   | 13.9072(4)                                                                    | 11.5302(2)                            | 10.8570(2)                                                                                   | 9.2600(2)                                           |
| c(Å)                                              | 13.1968(3)                                                                | 11.9258(3)                                                                    | 19.3518(6)                                                                    | 15.5452(3)                            | 15.8802(4)                                                                                   | 28.7420(6)                                          |
| α(deg)                                            | 103.579(2)°                                                               | 90°                                                                           | 99.445(2)°                                                                    | 90°                                   | 90°                                                                                          | 90°                                                 |
| β(deg)                                            | 103.829(2)°                                                               | 109.714(3)°                                                                   | 100.502(3)°                                                                   | 97.780(2)                             | 102.842(2)°                                                                                  | 96.315(2)°                                          |
| γ(deg)                                            | 111.271(2)°                                                               | 90°                                                                           | 105.746(3)°                                                                   | 90°                                   | 90°                                                                                          | 90°                                                 |
| V (Å <sup>3</sup> )                               | 1297.18(7)                                                                | 6854.0(3)                                                                     | 2094.97(12)                                                                   | 1548.74(5)                            | 5729.7(2)                                                                                    | 2652.95(10)                                         |
| Z                                                 | 2                                                                         | 12                                                                            | 4                                                                             | 2                                     | 4                                                                                            | 4                                                   |
| D <sub>calcd</sub> (g cm <sup>-3</sup> )          | 1.237                                                                     | 1.282                                                                         | 1.357                                                                         | 1.287                                 | 1.294                                                                                        | 1.365                                               |
| μ(mm <sup>-1</sup> )                              | 0.938                                                                     | 1.058                                                                         | 1.153                                                                         | 0.848                                 | 0.912                                                                                        | 0.984                                               |
| Reflns measd/indep                                | 37815/4553                                                                | 63787/13864                                                                   | 43908/7357                                                                    | 25463/4673                            | 48453/10040                                                                                  | 21461/5531                                          |
| Data/restrains/params                             | 4553 / 0 / 289                                                            | 13864/0/781                                                                   | 7357/0/497                                                                    | 4673/32/359                           | 10040/0/660                                                                                  | 5531/0/318                                          |
| GOF                                               | 1.089                                                                     | 1.238                                                                         | 1.104                                                                         | 1.094                                 | 1.157                                                                                        | 1.045                                               |
| R <sub>int</sub>                                  | 0.0576                                                                    | 0.0508                                                                        | 0.0295                                                                        | 0.0343                                | 0.0828                                                                                       | 0.0341                                              |
| R <sub>i</sub> [I>2σ] (all data)                  | 0.0331 (0.0838)                                                           | 0.0712 (0.1330)                                                               | 0.0378 (0.1022)                                                               | 0.0437, (0.1118)                      | 0.0873 (0.1782)                                                                              | 0.0351 (0.0782)                                     |
| R <sub>w</sub> [I>2σ] (all data)                  | 0.0385 (0.0858)                                                           | 0.0941 (0.1388)                                                               | 0.0460 (0.1068)                                                               | 0.0463, (0.1124)                      | 0.1121 (0.1873)                                                                              | 0.0469 (0.0818)                                     |
| Max. peak/hole (e <sup>-</sup> / Å <sup>3</sup> ) | 0.41/ -0.36                                                               | 0.58/-0.71                                                                    | 0.73/ -0.46                                                                   | 0.33/-0.68                            | 1.18/-0.75                                                                                   | 0.46/-0.43                                          |

**Table S6.** Selected bond lengths (Å) and bond angles (°) for HL<sub>3</sub>

|                                 | HL <sub>3</sub>    |                    |
|---------------------------------|--------------------|--------------------|
|                                 | Molecule I         | Molecule II        |
| C–C <sub>(NCCCS backbone)</sub> | 1.409(2), 1.381(2) | 1.405(2), 1.380(2) |
| C–N <sub>(NCCCS backbone)</sub> | 1.317(18)          | 1.317(19)          |
| C–S                             | 1.698(16)          | 1.6959(17)         |
| N–H                             | 0.860              | 0.860              |

**Table S7.** CV data for [L<sub>1</sub>Cu]<sub>3</sub>, [L<sub>2</sub>Cu]<sub>3</sub>, L<sub>3</sub>Cu, and L<sub>4</sub>Cu complexes in MeCN solutions

| Complex                          | E <sub>a</sub> | E <sub>c</sub> | i <sub>pa</sub> /i <sub>pc</sub> | E <sub>1/2</sub> (V) | ΔE(V) <sup>c</sup> |
|----------------------------------|----------------|----------------|----------------------------------|----------------------|--------------------|
| [L <sub>1</sub> Cu] <sub>3</sub> | -0.153         | -              | -                                | -                    | -                  |
| [L <sub>2</sub> Cu] <sub>3</sub> | -0.011         | -              | -                                | -                    | -                  |
| L <sub>3</sub> Cu                | -0.562         | -0.692         | 0.93                             | -0.627               | 0.130 <sup>b</sup> |
| L <sub>4</sub> Cu                | -0.286         | -0.440         | 1.20                             | -0.363               | 0.154 <sup>b</sup> |

<sup>a</sup>All values reported vs NHE, by adding 0.64V to the value measured vs the ferrocene/ferrocenium couple in CH<sub>3</sub>CN with Bu<sub>4</sub>NPF<sub>6</sub> as electrolyte and potentials (in V vs. Fc<sup>+0</sup>) were measured at a glassy carbon electrode at a scan rate of 0.01Vs<sup>-1</sup>.

<sup>b</sup>. Quasi-reversible.

<sup>c</sup>. ΔE=E<sub>c</sub>-E<sub>a</sub>.

**Table S8.** Kinetic data and equilibrium constants of carbonylation and decarbonylation for β-thioketiminato copper(I) complexes.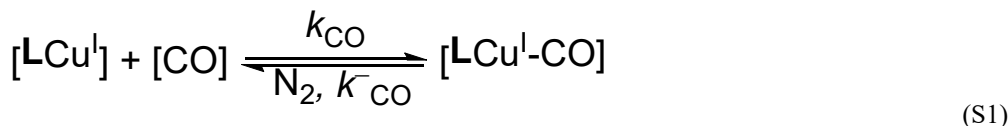

$$K_{\text{CO}} = \frac{k_{\text{CO}}}{k_{-\text{CO}}} \quad (\text{S2})$$

The equilibrium constants and the binding constants for carbonylation and decarbonylation experiments were calculated using the above equations (S1) and (S2).

| Complex                          | Wavenumber (cm <sup>-1</sup> ) | k <sub>CO</sub> , M <sup>-1</sup> s <sup>-1</sup> | k <sub>-CO</sub> , s <sup>-1</sup> | K <sub>CO</sub> , M <sup>-1</sup> |
|----------------------------------|--------------------------------|---------------------------------------------------|------------------------------------|-----------------------------------|
| [L <sub>1</sub> Cu] <sub>3</sub> | 2085                           | 4.77x10 <sup>-4</sup> (±0.17)                     | 1.45x10 <sup>-3</sup> (±0.09)      | 0.32(±0.06)                       |
| [L <sub>2</sub> Cu] <sub>3</sub> | 2085                           | 1.09x10 <sup>-3</sup> (±0.04)                     | 3.22x10 <sup>-3</sup> (±0.09)      | 0.33(±0.15)                       |
| L <sub>3</sub> Cu                | 1995                           | 5.91x10 <sup>-3</sup> (±0.05)                     | 2.14x10 <sup>-4</sup> (±0.18)      | 27.61(±0.12)                      |
|                                  | 2019                           | 4.57x10 <sup>-3</sup> (±0.26)                     | 2.25x10 <sup>-4</sup> (±0.20)      | 20.31(±0.26)                      |
| L <sub>4</sub> Cu                | 1995                           | 8.91x10 <sup>-3</sup> (±0.67)                     | 3.35x10 <sup>-4</sup> (±0.07)      | 26.53(±0.33)                      |
|                                  | 2020                           | 5.35x10 <sup>-3</sup> (±0.59)                     | 3.26x10 <sup>-4</sup> (±0.10)      | 16.40(±0.56)                      |
